# Supplementary material
Source: MDPI journal article supplement (https://www.mdpi.com/2075-163X/9/6/375)
Supplement: s1 [file s1]

## Sheet: Table S1
																														MW=
																														60.08	79.9	101.96	71.85	70.94	40.3	56.08	61.98	94.2	141.937
																														LIQUID												LIQUID
					Liquid (Glass) Composition - in Weight Percent														Feldspar Compositions - in Weight Percent											CATION PROPORTIONS												CATION FRACTIONS
Data Source	Exp	P (GPa)	T (°C)		SiO2	TiO2	Al2O3	FeOt	MnO	MgO	CaO	Na2O	K2O	P2O5	Total		H2O		SiO2	TiO2	Al2O3	FeOt	MnO	MgO	CaO	Na2O	K2O	Total		SiO2	TiO2	AlO3/2	FeO	MnO	MgO	CaO	NaO0.5	KO0.5	PO5/2	sum		SiO2	TiO2	AlO3/2	FeO	MnO	MgO	CaO	NaO0.5
Calibration dataset																	FTIR-based determination
This work	CA-4	0.15	1000		64.3411	0.286813	17.9855	1.71067	0.0173517	0.467475	1.73619	4.49204	7.54288	0	98.58		1.37		58.9575	0.04625	25.242	0.66775	0.01375	0.0475	6.799	6.10525	1.9845	99.8635		1.07092	0.00358965	0.352796	0.0238089	0.000244597	0.0115999	0.0309591	0.144951	0.160146	0	1.79902		0.595282	0.00199534	0.196105	0.0132344	0.000135961	0.00644789	0.0172089	0.0805725
This work	CA-7	0.15	1000		65.4011	0.279441	16.9538	1.70043	0.00891834	0.600501	1.0702	4.40566	7.31997	0	97.74		1.72		58.2825	0.02675	26.5	0.59025	0.02775	0.0265	7.5645	6.001	1.584	100.603		1.08857	0.00349739	0.332557	0.0236664	0.000125717	0.0149008	0.0190835	0.142164	0.155413	0	1.77998		0.611563	0.00196485	0.186832	0.0132959	7.06283e-05	0.00837134	0.0107212	0.0798684
This work	CA-8	0.15	1000		63.159	0.372	17.245	2.351	0.11	0.809	1.983	4.692	7.052	0	97.773		2.2		57.4732	0.0782	26.2784	0.9708	0.0172	0.1028	7.9796	5.5292	1.6104	100.04		1.05125	0.00465582	0.33827	0.0327209	0.00155061	0.0200744	0.0353602	0.151404	0.149724	0	1.78501		0.588932	0.00260829	0.189506	0.018331	0.000868683	0.0112461	0.0198095	0.0848196
This work	CA-9	0.15	1000		64.45	0.28	18.01	1.73	0.04	0.52	1.91	4.41	7.42	0	98.77		1.27		58.651	0.049	26.0173	0.505	0.013	0.0153333	7.07067	6.05	1.76	100.131		1.07274	0.00350438	0.353276	0.0240779	0.000563857	0.0129032	0.0340585	0.142304	0.157537	0	1.80096		0.595647	0.00194584	0.19616	0.0133695	0.000313087	0.00716463	0.0189113	0.0790156
This work	CA-17	0.15	1000		62.7947	0.309285	17.3229	2.09957	0.144729	0.724639	1.64853	4.39244	7.27315	0	96.71		2.96		54.291	0.033	29.0298	0.700667	0.0301667	0.0645	10.9128	4.49867	0.812667	100.373		1.04519	0.0038709	0.339798	0.0292215	0.00204017	0.0179811	0.029396	0.141737	0.154419	0	1.76365		0.592626	0.00219482	0.192668	0.0165688	0.00115679	0.0101954	0.0166677	0.0803659
This work	CA-21	0.15	1000		62.595	0.322	17.374	2.129	0.047	0.878	2.203	4.349	6.483	0	96.38		3.5		54.2378	0.0394	28.841	0.8784	0.018	0.068	10.8638	4.4026	0.7836	100.133		1.04186	0.00403004	0.3408	0.0296312	0.000662532	0.0217866	0.0392832	0.140336	0.137643	0	1.75603		0.593303	0.00229497	0.194074	0.0168739	0.000377289	0.0124067	0.0223704	0.0799162
This work	CA-19	0.15	1020		62.217	0.427	16.986	2.636	0.149	1.059	2.623	4.289	6.389	0	96.775		2.23		56.372	0.04825	27.6097	0.5695	0.01575	0.0355	9.5575	5.16775	1.13125	100.507		1.03557	0.00534418	0.333189	0.0366875	0.00210037	0.0262779	0.0467725	0.138399	0.135648	0	1.75999		0.588396	0.00303649	0.189313	0.0208453	0.0011934	0.0149307	0.0265754	0.0786366
This work	CA-22	0.15	1020		61.82	0.33	17.42	2.87	0.12	1.21	3.12	4.26	6.09	0	97.24		2.63		54.8928	0.044	27.9388	0.814	0.0035	0.0876667	10.2455	4.6605	0.9805	99.6673		1.02896	0.00413016	0.341703	0.0399443	0.00169157	0.0300248	0.0556348	0.137464	0.129299	0	1.76885		0.581711	0.00233494	0.193178	0.0225821	0.000956309	0.0169742	0.0314525	0.0777135
Masotta and Keppler (GCA2015)	AND-15	0.2	850		65.7983	0.465827	18.9369	1.62606	0	0.2495	1.69615	5.01783	6.05573	0	99.8463		7.3249		57.38	0.19	23.75	1.16	0	0.43	7.34	5.92	1.6	97.77		1.09518	0.00583012	0.371457	0.0226313	0	0.00619107	0.0302453	0.161918	0.128572	0	1.82202		0.601078	0.00319981	0.203871	0.012421	0	0.00339791	0.0165998	0.088867
Masotta and Keppler (GCA2015)	AND-13	0.202	900		63.9151	0.434528	19.6129	1.71377	0	0.796105	2.75954	5.69303	4.87019	0	99.7952		5.7467		54.08	0.19	27.37	1.21	0	0.17	10.56	4.9	0.69	99.17		1.06383	0.0054384	0.384718	0.023852	0	0.0197545	0.0492072	0.183705	0.103401	0	1.83391		0.58009	0.00296547	0.20978	0.0130061	0	0.0107718	0.0268319	0.100171
Masotta and Keppler (GCA2015)	AND-16	0.202	900		63.8703	0.47799	19.5616	1.83416	0	0.651651	2.99714	5.61047	4.79886	0	99.8022		6.35724		54.85	0.14	26.43	1.06	0	0.24	10.13	5.11	0.97	98.93		1.06309	0.00598235	0.383711	0.0255277	0	0.01617	0.053444	0.181041	0.101887	0	1.83085		0.580652	0.00326752	0.209581	0.0139431	0	0.00883196	0.0291908	0.0988837
Masotta and Keppler (GCA2015)	AND-18	0.195	950		60.1921	0.880998	19.1282	3.31583	0	1.47446	5.23211	5.5993	3.70211	0	99.5252		7.39726		49.2	0.16	29.53	1.26	0	0.23	14.96	2.62	0.62	98.58		1.00187	0.0110263	0.37521	0.0461494	0	0.0365871	0.0932973	0.180681	0.0786011	0	1.82342		0.549444	0.00604703	0.205773	0.0253093	0	0.0200651	0.0511661	0.0990891
Masotta and Keppler (GCA2015)	AND-7	0.2	850		64.71	0.67	19.51	1.64	0	0.48	2.28	4.81	5.76	0	99.86		7.57393		56.64	0.22	24.17	1.18	0	0.35	7.89	5.51	1.75	97.71		1.07706	0.00838548	0.382699	0.0228253	0	0.0119107	0.0406562	0.155211	0.122293	0	1.82105		0.591454	0.00460476	0.210154	0.0125342	0	0.00654057	0.0223258	0.085232
Masotta and Keppler (GCA2015)	AND-10	0.2	850		65.2185	0.614944	19.5607	1.45049	0	0.434499	2.49224	4.69635	5.39329	0	99.861		7.1043		56.8	0.34	23.43	1.87	0	0.3	7.26	5.6	1.81	97.41		1.08553	0.00769642	0.383693	0.0201877	0	0.0107816	0.0444408	0.151544	0.114507	0	1.81838		0.596976	0.00423257	0.211008	0.0111021	0	0.00592924	0.0244398	0.0833402
Masotta and Keppler (GCA2015)	AND-8	0.202	900		62.8091	0.578809	19.7937	1.97608	0	0.71265	3.52508	5.83307	4.5041	0	99.7325		6.64954		52.81	0.05	28.6	1.04	0	0.13	12.04	4.48	0.49	99.64		1.04542	0.00724416	0.388263	0.0275028	0	0.0176836	0.0628581	0.188224	0.0956284	0	1.83283		0.570388	0.00395245	0.211838	0.0150057	0	0.00964827	0.0342956	0.102696
Masotta and Keppler (GCA2015)	AND-12	0.202	900		63.9835	0.479805	19.6522	1.81687	0	0.815787	2.74879	5.36322	4.90689	0	99.767		5.89275		54.7	0.19	26.29	1.13	0	0.24	9.75	5.06	1.08	98.44		1.06497	0.00600507	0.385488	0.025287	0	0.0202429	0.0490156	0.173063	0.10418	0	1.82825		0.582508	0.00328459	0.21085	0.0138312	0	0.0110722	0.0268101	0.0946603
Masotta and Keppler (GCA2015)	AND-9	0.17	950		62.0134	0.641267	19.2871	2.45995	0	1.15497	4.57958	5.50643	3.9863	0	99.629		6.03027		51.32	0.15	28.13	1.42	0	0.23	12.49	3.24	0.87	97.85		1.03218	0.00802587	0.378327	0.0342373	0	0.0286594	0.0816615	0.177684	0.0846348	0	1.82541		0.565451	0.00439675	0.207256	0.018756	0	0.0157002	0.044736	0.0973392
Masotta and Keppler (GCA2015)	AND-11	0.17	950		62.0206	0.628531	19.1753	2.38491	0	1.27911	4.57931	5.62978	3.93813	0	99.6356		6.56236		49.1	0.05	30.86	1.18	0	0.13	15.09	2.89	0.2	99.5		1.0323	0.00786647	0.376134	0.0331928	0	0.0317397	0.0816568	0.181664	0.0836121	0	1.82817		0.564664	0.00430293	0.205744	0.0181564	0	0.0173615	0.0446659	0.0993698
Masotta and Keppler (GCA2015)	AND-19	0.202	950		62.3503	0.490081	19.7095	2.09483	0	0.974397	3.41741	6.08301	4.6006	0	99.7201		5.11639		53.79	0.15	26.55	1.1	0	0.28	10.07	4.69	1.09	97.72		1.03779	0.00613368	0.386613	0.0291556	0	0.0241786	0.0609381	0.196289	0.0976773	0	1.83877		0.564391	0.00333575	0.210256	0.015856	0	0.0131493	0.0331406	0.10675
Test dataset
Masotta et al. (CMP2013)	VGPL-2	0.3	900		66.976	0.385773	18.7895	2.41929	0.0868818	0.627295	2.19056	2.38526	6.00342	0.135969	100		4.91		56.4498	0.03525	26.7343	0.771	0.022	0.04775	8.62625	5.20325	1.50675	99.3962		1.11478	0.0048282	0.368566	0.0336714	0.00122472	0.0155656	0.0390614	0.0769686	0.127461	0.00191591	1.78404		0.624862	0.00270632	0.20659	0.0188736	0.000686486	0.00872492	0.0218949	0.0431428
Masotta et al. (CMP2013)	VGPL-4	0.3	950		62.4119	0.483291	18.4331	2.49195	0.069079	0.782414	2.45709	5.19521	7.35121	0.324815	100		4.51		57.5142	0.02	25.9383	0.67875	0.023	0.048	8.08025	5.54675	1.712	99.5612		1.03881	0.00604869	0.361575	0.0346827	0.000973766	0.0194147	0.043814	0.167642	0.156077	0.00457689	1.83362		0.566538	0.00329878	0.197192	0.0189149	0.000531063	0.0105882	0.0238948	0.0914267
Masotta et al. (CMP2013)	VGPL-5	0.3	950		63.52	0.47	18.19	2.6	0.07	0.85	2.65	4.76	6.59	0.31	100.01		3.4		57.3296	0.0758	26.4238	0.895	0.0112	0.0404	8.8508	5.5568	1.429	100.612		1.05726	0.00588235	0.356807	0.0361865	0.000986749	0.0210918	0.0472539	0.153598	0.139915	0.00436814	1.82335		0.579844	0.00322613	0.195688	0.0198462	0.000541175	0.0115676	0.025916	0.0842396
Masotta et al. (CMP2013)	VGPL-6	0.3	950		64.59	0.35	18.2	2.99	0.09	0.71	2.11	4.04	6.72	0.2	100		2.97		56.2318	0.0865	26.2368	0.709	0.0165	0.192	8.17075	5.90875	1.68275	99.2347		1.07507	0.00438048	0.357003	0.0416145	0.00126868	0.0176179	0.0376248	0.130365	0.142675	0.00281815	1.81043		0.593817	0.00241957	0.197192	0.0229859	0.000700759	0.0097313	0.0207822	0.0720074
Andujar et al. (2010)	LN8	0.2	875		62.1	0.45	20.2	1.86	0.12	0.26	0.71	9.1	5.2	0	100		4.7		63.7	0.16	19.32	1.07	0	0.28	1.71	7.69	4.15	98.08		1.03362	0.00563204	0.396234	0.0258873	0.00169157	0.00645161	0.0126605	0.293643	0.110403	0	1.88623		0.547984	0.00298588	0.210067	0.0137244	0.000896802	0.00342038	0.00671208	0.155678
Andujar et al. (2010)	LN11	0.1	850		62	0.46	20.6	1.77	0.13	0.2	0.56	8.9	5.4	0	100.02		4.9		64.9	0.09	20.22	0.49	0	0.01	1.11	8.55	4.47	99.84		1.03196	0.0057572	0.40408	0.0246347	0.00183253	0.00496278	0.00998573	0.287189	0.11465	0	1.88505		0.547443	0.00305414	0.21436	0.0130684	0.000972141	0.00263271	0.00529733	0.152351
Andujar et al. (2010)	LN12	0.1	850		60.5	0.54	20.7	2.28	0.15	0.24	0.6	9.3	5.7	0	100.01		4.9		64	0.35	19.68	1.45	0	0.16	0.87	8.55	3.96	99.02		1.00699	0.00675845	0.406042	0.0317328	0.00211446	0.00595533	0.010699	0.300097	0.121019	0	1.89141		0.532403	0.00357324	0.214677	0.0167773	0.00111793	0.00314862	0.00565663	0.158663
Andujar et al. (2010)	LN14	0.1	875		62	0.51	20.1	2.12	0.14	0.25	0.6	9.4	4.9	0	100.02		2.5		63.4	0.35	19.6	1.55	0	0.16	1.38	8.48	3.45	98.37		1.03196	0.00638298	0.394272	0.0295059	0.0019735	0.00620347	0.010699	0.303324	0.104034	0	1.88835		0.546486	0.00338018	0.208792	0.0156252	0.00104509	0.00328513	0.00566579	0.160629
Andujar et al. (2010)	LN19	0.2	775		60.9	0.26	21.8	1.85	0.18	0.11	0.35	9.6	5	0	100.05		8.1		62.9	0.06	19.47	0.49	0	0	0.49	5.72	7.99	97.12		1.01365	0.00325407	0.427619	0.0257481	0.00253736	0.00272953	0.00624108	0.309777	0.106157	0	1.89771		0.534142	0.00171473	0.225334	0.013568	0.00133706	0.00143833	0.00328874	0.163237
Andujar et al. (2010)	LN22	0.25	775		62.4	0.2	21.3	1.55	0.12	0.08	0.39	8.9	5	0	99.94		9.5		64.7	0.04	19.43	0.36	0	0.02	0.43	5.81	7.35	98.14		1.03862	0.00250313	0.417811	0.0215727	0.00169157	0.00198511	0.00695435	0.287189	0.106157	0	1.88448		0.551142	0.00132829	0.221712	0.0114476	0.000897633	0.0010534	0.00369033	0.152397
Andujar et al. (2010)	LN23	0.1	887		61.4	0.49	19.9	2.31	0.16	0.26	0.73	9.1	5.7	0	100.05		4.1		65.2	0.19	20	0.95	0	0.3	2.31	7.54	3.2	99.69		1.02197	0.00613267	0.390349	0.0321503	0.00225543	0.00645161	0.0130171	0.293643	0.121019	0	1.88699		0.541588	0.00324997	0.206863	0.0170379	0.00119525	0.003419	0.00689835	0.155615
Andujar et al. (2010)	LN27	0.1	900		60.9	0.39	19.9	2.5	0.2	0.25	0.69	9.4	5.8	0	100.03		2		64.4	0.4	19.59	1.94	0	0.33	1.58	7.48	3.99	99.71		1.01365	0.0048811	0.390349	0.0347947	0.00281928	0.00620347	0.0123039	0.303324	0.123142	0	1.89147		0.535906	0.00258059	0.206374	0.0183956	0.00149053	0.00327972	0.00650493	0.160364
Andujar et al. (2010)	LN29	0.2	900		61.4	0.31	19.8	2.3	0.14	0.21	0.61	9.5	5.7	0	99.97		3.4		65.2	0.38	19.18	1.24	0	0.19	1.34	7.58	4.39	99.5		1.02197	0.00387985	0.388388	0.0320111	0.0019735	0.00521092	0.0108773	0.306551	0.121019	0	1.89188		0.540188	0.00205079	0.205292	0.0169203	0.00104314	0.00275436	0.00574947	0.162035
Andujar et al. (2010)	LN31	0.2	925		61.7	0.33	19.6	2.32	0.19	0.24	0.68	9.2	5.7	0	99.96		2.8		65.3	0.26	19.45	1.29	0	0.21	1.65	7.43	3.33	98.92		1.02696	0.00413016	0.384464	0.0322895	0.00267832	0.00595533	0.0121255	0.29687	0.121019	0	1.8865		0.544376	0.00218933	0.203798	0.0171161	0.00141973	0.00315682	0.00642754	0.157366
Romano et al. (JPet2018)	GTR7-3	0.15	900		66.57	0.85	15.96	3.35	0.18	0.66	1.35	6.35	4.59	0.14	100		3.54		65.84	0.22	18.1	1.1	0.02	0.07	0.97	7.61	4.75	98.68		1.10802	0.0106383	0.313064	0.0466249	0.00253736	0.0163772	0.0240728	0.204905	0.0974522	0.00197271	1.82567		0.606914	0.00582708	0.171479	0.0255386	0.00138982	0.00897051	0.0131857	0.112236
Romano et al. (JPet2018)	GTR8-2	0.15	850		68.34	0.56	14.59	3.85	0.17	0.12	0.45	6.74	5.08	0.09	99.99		4.47		68.48	0.3	17.83	1.37	0.14	0.15	0.89	6.76	4.99	100.91		1.13748	0.00700876	0.286191	0.0535839	0.00239639	0.00297767	0.00802425	0.21749	0.107856	0.00126817	1.82428		0.623525	0.00384194	0.156879	0.0293726	0.00131361	0.00163224	0.00439859	0.119219
Romano et al. (JPet2018)	GTR10-5	0.15	950		66.65	0.68	14.68	4.8	0.22	0.35	1	6.36	5.09	0.16	99.99		1.11		64.78	0.31	19.02	1.05	0.02	0.04	1.04	8.01	4.33	98.6		1.10935	0.00851064	0.287956	0.0668058	0.00310121	0.00868486	0.0178317	0.205227	0.108068	0.00225452	1.81779		0.610275	0.00468185	0.15841	0.036751	0.00170603	0.00477769	0.00980951	0.112899
Romano et al. (JPet2018)	GTR2-3	0.1	900		67.61	0.48	15.35	3.35	0.07	0.3	1.13	6.5	4.95	0.26	100		2.65		65.09	0.44	18.46	1.25	0.07	0.35	1.88	7.51	3.54	98.59		1.12533	0.00600751	0.301098	0.0466249	0.000986749	0.00744417	0.0201498	0.209745	0.105096	0.0036636	1.82615		0.616233	0.00328972	0.164882	0.0255318	0.000540344	0.00407643	0.011034	0.114857
Romano et al. (JPet2018)	GTR2-4	0.1	900		67.69	0.56	14.59	4.27	0.19	0.27	0.91	6.29	4.98	0.25	100		2.01		64.96	0.5	18.72	1	0	0.05	2	7.5	4.01	98.74		1.12666	0.00700876	0.286191	0.0594294	0.00267832	0.00669975	0.0162268	0.202969	0.105732	0.00352269	1.81712		0.620027	0.00385707	0.157497	0.0327052	0.00147393	0.00368701	0.00892996	0.111698
Romano et al. (JPet2018)	GTR11-4	0.05	950		65.2	1	14.87	5.05	0.33	0.28	1.49	6.31	5.47	0	100		1.67		64.29	0.21	18.15	0.74	0.2	0.11	1.92	7.55	3.68	96.85		1.08522	0.0125156	0.291683	0.0702853	0.00465182	0.00694789	0.0265692	0.203614	0.116136	0	1.81762		0.597054	0.00688572	0.160475	0.0386688	0.00255929	0.00382252	0.0146175	0.112022
Romano et al. (JPet2018)	GTR11-5	0.05	950		65.77	0.74	14.31	5.67	0.18	0.38	1.37	6.3	5	0.28	100		0.83		63.85	0.11	19.05	1.39	0.02	0.06	1.88	7.79	3.51	97.66		1.09471	0.00926158	0.280698	0.0789144	0.00253736	0.00942928	0.0244294	0.203291	0.106157	0.00394541	1.81337		0.603686	0.00510738	0.154794	0.0435181	0.00139925	0.00519986	0.0134718	0.112107
Romano et al. (JPet2018)	R1-5	0.15	950		67.1	0.62	15.29	4.14	0.19	0.25	1.31	6.07	4.93	0.1	100		1.44		65.53	0.17	19.52	0.64	0	0	1.09	7.6	4.42	98.97		1.11684	0.0077597	0.299922	0.05762	0.00267832	0.00620347	0.0233595	0.19587	0.104671	0.00140908	1.81634		0.614888	0.00427217	0.165124	0.0317232	0.00147457	0.00341538	0.0128608	0.107838
Romano et al. (JPet2018)	R4-4	0.1	950		67.45	0.69	15.12	3.46	0.16	0.37	1.34	6.46	4.81	0.17	100.03		2.5		65.8	0.13	19.52	0.61	0.3	0.8	1.02	7.8	4.91	100.89		1.12267	0.00863579	0.296587	0.0481559	0.00225543	0.00918114	0.0238944	0.208454	0.102123	0.00239543	1.82435		0.61538	0.00473362	0.162571	0.0263962	0.00123629	0.00503255	0.0130975	0.114262
Romano et al. (JPet2018)	R4-5	0.1	950		68.53	0.79	13.97	3.64	0.18	0.31	0.91	6.05	5.41	0.18	99.97		1.11		63.29	0.26	17.95	1.63	0.02	0.06	1.19	7.79	4.25	96.44		1.14065	0.00988736	0.274029	0.0506611	0.00253736	0.00769231	0.0162268	0.195224	0.114862	0.00253634	1.8143		0.628697	0.00544968	0.151038	0.0279232	0.00139853	0.00423982	0.00894383	0.107603
Romano et al. (JPet2018)	R3-3	0.05	900		68.25	0.44	15.02	3.23	0.15	0.24	1.09	6.33	5.11	0.15	100.01		2.86		64.19	0.1	19.03	0.65	0.04	0.01	1.38	8.3	3.98	97.68		1.13599	0.00550688	0.294625	0.0449548	0.00211446	0.00595533	0.0194365	0.204259	0.108493	0.00211361	1.82344		0.622989	0.00302004	0.161576	0.0246538	0.0011596	0.00326598	0.0106592	0.112018
Mollo et al 2015		0.1	862		60.29	0.41	16.36	1.18	0.64	0.34	2.53	6.21	7.01	0.83	95.8		4.16		60.36	0	24.75	0	0	0	6.33	7.06	1.5	100		1.0035	0.00513141	0.32091	0.0164231	0.00902171	0.00843672	0.0451141	0.200387	0.148832	0.0116953	1.76945		0.567124	0.00290001	0.181362	0.00928149	0.0050986	0.004768	0.0254962	0.113248
Mollo et al 2015		0.1	832		60.66	0.21	12.73	1.58	1.62	0.27	2.64	9.3	4.78	0.82	94.61		5.32		61.83	0	23.73	0	0	0	5.15	7.65	1.64	100		1.00965	0.00262829	0.249706	0.0219903	0.0228362	0.00669975	0.0470756	0.300097	0.101486	0.0115544	1.77373		0.569227	0.00148179	0.14078	0.0123978	0.0128747	0.00377722	0.0265405	0.16919
Mollo et al 2015		0.2	1007		60.28	0.54	17.04	2.28	0.16	0.94	3.05	4.86	8.12	0.9	98.17		1.77		55.84	0	27.8	0	0	0	9.91	4.98	1.48	100.01		1.00333	0.00675845	0.334249	0.0317328	0.00225543	0.0233251	0.0543866	0.156825	0.172399	0.0126817	1.79794		0.558043	0.00375899	0.185906	0.0176495	0.00125445	0.0129732	0.0302494	0.0872246
Mollo et al 2015		0.2	977		58.28	0.52	16.77	2.66	0.24	1.16	4.12	5.7	6.38	1.39	97.22		2.7		56.52	0	27.35	0	0	0	9.37	5.31	1.45	100		0.97004	0.00650814	0.328953	0.0370216	0.00338314	0.0287841	0.0734665	0.18393	0.135456	0.0195862	1.78713		0.542792	0.00364167	0.184068	0.0207157	0.00189306	0.0161063	0.0411087	0.102919
Mollo et al 2015		0.2	947		57.14	0.47	15.3	2.84	0.54	0.96	5.69	6.28	4.89	2.13	96.24		3.67		57.47	0	26.7	0	0	0	8.62	5.74	1.46	99.99		0.951065	0.00588235	0.300118	0.0395268	0.00761207	0.0238213	0.101462	0.202646	0.103822	0.0300133	1.76597		0.538552	0.00333095	0.169945	0.0223825	0.00431042	0.0134891	0.0574541	0.114751
Mollo et al 2015		0.2	917		55.83	0.41	14.2	2.76	0.72	0.73	7.18	6.68	3.86	2.84	95.21		4.7		57.94	0	26.41	0	0	0	8.27	6	1.4	100.02		0.929261	0.00513141	0.278541	0.0384134	0.0101494	0.0181141	0.128031	0.215553	0.0819533	0.0400178	1.74517		0.532477	0.00294036	0.159607	0.0220113	0.00581574	0.0103796	0.0733635	0.123515
Mollo et al 2015		0.2	846		59.29	0.37	17.36	1.12	0.35	0.23	2.55	5.5	7.14	0.83	94.74		5.22		59.2	0	25.58	0	0	0	7.29	6.67	1.26	100		0.986851	0.00463079	0.340526	0.015588	0.00493375	0.0057072	0.0454708	0.177477	0.151592	0.0116953	1.74447		0.565702	0.00265455	0.195203	0.00893568	0.00282822	0.00327159	0.0260656	0.101737
Mollo et al 2015		0.2	816		58.57	0.21	15.98	1.26	0.62	0.17	2.64	6.86	5.64	1	92.95		7.02		60.11	0	24.98	0	0	0	6.58	7.09	1.25	100.01		0.974867	0.00262829	0.313456	0.0175365	0.00873978	0.00421836	0.0470756	0.221362	0.119745	0.0140908	1.72372		0.56556	0.00152478	0.181849	0.0101737	0.0050703	0.00244724	0.0273105	0.128421
Mollo et al 2015		0.2	804		57.3	0.15	15.08	1.46	1.27	0.16	2.59	8.2	4.52	1.17	91.9		8.07		61.64	0	23.9	0	0	0	5.34	7.68	1.45	100.01		0.953728	0.00187735	0.295802	0.0203201	0.0179025	0.00397022	0.046184	0.264601	0.095966	0.0164862	1.71684		0.555514	0.00109349	0.172295	0.0118358	0.0104276	0.00231252	0.0269006	0.154121
Mollo et al 2015		0.3	922		59.57	0.69	17.97	1.41	0.36	0.56	2.52	5.08	8.18	0.68	97.02		2.93		60.31	0	24.69	0	0	0	6.3	6.79	1.92	100.01		0.991511	0.00863579	0.352491	0.0196242	0.00507471	0.0138958	0.0449358	0.163924	0.173673	0.00958172	1.78335		0.555983	0.00484246	0.197657	0.0110041	0.00284561	0.00779197	0.0251974	0.0919192
Mollo et al 2015		0.3	862		58.45	0.37	17.46	1.37	0.64	0.25	2.36	6.44	6.71	0.73	94.78		5.18		60.27	0	24.8	0	0	0	6.4	6.99	1.54	100		0.97287	0.00463079	0.342487	0.0190675	0.00902171	0.00620347	0.0420827	0.207809	0.142463	0.0102863	1.75692		0.553735	0.00263574	0.194936	0.0108528	0.00513495	0.00353088	0.0239525	0.11828
Mollo et al 2015		0.3	908		59.74	0.45	18.33	1.43	0.22	0.45	2.42	4.73	8.13	0.68	96.58		3.36		59.89	0	25.01	0	0	0	6.66	6.7	1.73	99.99		0.994341	0.00563204	0.359553	0.0199026	0.00310121	0.0111663	0.0431526	0.15263	0.172611	0.00958172	1.77167		0.561245	0.00317894	0.202946	0.0112338	0.00175044	0.00630267	0.024357	0.0861502
Mollo et al 2015		0.3	878		59.34	0.49	18.08	1.25	0.29	0.3	2.43	5.06	7.71	0.71	95.66		4.31		59.54	0	25.3	0	0	0	6.98	6.68	1.5	100		0.987683	0.00613267	0.354649	0.0173974	0.00408796	0.00744417	0.043331	0.163278	0.163694	0.0100044	1.7577		0.561917	0.00348902	0.201768	0.00989778	0.00232574	0.00423517	0.024652	0.0928931
Mollo et al 2015		0.3	848		58.65	0.35	17.82	1.23	0.38	0.21	2.41	5.62	6.87	0.79	94.33		5.61		59.65	0	25.26	0	0	0	6.92	6.81	1.36	100		0.976198	0.00438048	0.349549	0.017119	0.00535664	0.00521092	0.0429743	0.181349	0.14586	0.0111317	1.73913		0.561315	0.00251878	0.200991	0.00984343	0.00308007	0.00299628	0.0247103	0.104276
Mollo et al 2015		0.3	818		57.47	0.22	17.28	1.28	0.49	0.15	2.56	6.27	5.88	0.96	92.56		7.39		59.65	0	25.29	0	0	0	6.95	6.89	1.22	100		0.956558	0.00275344	0.338956	0.0178149	0.00690725	0.00372208	0.0456491	0.202323	0.124841	0.0135271	1.71305		0.558394	0.00160733	0.197867	0.0103995	0.00403213	0.00217278	0.0266478	0.118107
[truncated: 134 more columns]

## Sheet: Table S2
																										MW=
																										60.08	79.9	101.96	71.85	70.94	40.3	56.08	61.98	94.2	141.937
																										LIQUID												LIQUID
			Liquid (Glass) Composition - in Weight Percent												Clinopyroxene Compositions - in Weight Percent											CATION PROPORTIONS												CATION FRACTIONS
Data Source	H2O		SiO2	TiO2	Al2O3	FeOt	MnO	MgO	CaO	Na2O	K2O	P2O5	Total		SiO2	TiO2	Al2O3	FeOt	MnO	MgO	CaO	Na2O	K2O	Total		SiO2	TiO2	AlO3/2	FeO	MnO	MgO	CaO	NaO0.5	KO0.5	PO5/2	sum		SiO2	TiO2	AlO3/2	FeO	MnO	MgO	CaO	NaO0.5	KO0.5	PO5/2
Clinopyroxene in Latite	2		59.8	0.52	16.7	5.47	0.11	2.36	5	4.23	5.51	0.3	100
Bullock et al. (2019)	2		59.8	0.52	16.7	5.47	0.11	2.36	5	4.23	5.51	0.3	100		51.81	0.59	3.45	8.61	0.24	13.94	21.99	0.47	0	101.1		0.99534	0.00650814	0.327579	0.0761308	0.00155061	0.0585608	0.0891583	0.136496	0.116985	0.00422723	1.81254		0.549142	0.00359062	0.18073	0.0420024	0.00085549	0.0323088	0.0491898	0.0753065	0.0645423	0.00233222	1
Bullock et al. (2019)	2		59.8	0.52	16.7	5.47	0.11	2.36	5	4.23	5.51	0.3	100		51.49	0.6	3.61	8.48	0.26	13.92	22.04	0.46	0	100.86		0.99534	0.00650814	0.327579	0.0761308	0.00155061	0.0585608	0.0891583	0.136496	0.116985	0.00422723	1.81254		0.549142	0.00359062	0.18073	0.0420024	0.00085549	0.0323088	0.0491898	0.0753065	0.0645423	0.00233222	1
Bullock et al. (2019)	2		59.8	0.52	16.7	5.47	0.11	2.36	5	4.23	5.51	0.3	100		51.75	0.58	3.9	8.72	0.26	13.72	20.92	0.43	0	100.28		0.99534	0.00650814	0.327579	0.0761308	0.00155061	0.0585608	0.0891583	0.136496	0.116985	0.00422723	1.81254		0.549142	0.00359062	0.18073	0.0420024	0.00085549	0.0323088	0.0491898	0.0753065	0.0645423	0.00233222	1
Bullock et al. (2019)	2		59.8	0.52	16.7	5.47	0.11	2.36	5	4.23	5.51	0.3	100		51.38	0.34	2.43	9.1	0.3	14.23	20.18	0.43	0	98.39		0.99534	0.00650814	0.327579	0.0761308	0.00155061	0.0585608	0.0891583	0.136496	0.116985	0.00422723	1.81254		0.549142	0.00359062	0.18073	0.0420024	0.00085549	0.0323088	0.0491898	0.0753065	0.0645423	0.00233222	1
Bullock et al. (2019)	2		59.8	0.52	16.7	5.47	0.11	2.36	5	4.23	5.51	0.3	100		51.26	0.54	3.67	8.53	0.23	13.95	20.48	0.47	0	99.13		0.99534	0.00650814	0.327579	0.0761308	0.00155061	0.0585608	0.0891583	0.136496	0.116985	0.00422723	1.81254		0.549142	0.00359062	0.18073	0.0420024	0.00085549	0.0323088	0.0491898	0.0753065	0.0645423	0.00233222	1
Bullock et al. (2019)	2		59.8	0.52	16.7	5.47	0.11	2.36	5	4.23	5.51	0.3	100		50.67	0.36	2.68	8.96	0.27	14.28	20.3	0.48	0	98		0.99534	0.00650814	0.327579	0.0761308	0.00155061	0.0585608	0.0891583	0.136496	0.116985	0.00422723	1.81254		0.549142	0.00359062	0.18073	0.0420024	0.00085549	0.0323088	0.0491898	0.0753065	0.0645423	0.00233222	1
Bullock et al. (2019)	2		59.8	0.52	16.7	5.47	0.11	2.36	5	4.23	5.51	0.3	100		51.91	0.57	3.6	8.66	0.22	13.7	20.78	0.46	0	99.9		0.99534	0.00650814	0.327579	0.0761308	0.00155061	0.0585608	0.0891583	0.136496	0.116985	0.00422723	1.81254		0.549142	0.00359062	0.18073	0.0420024	0.00085549	0.0323088	0.0491898	0.0753065	0.0645423	0.00233222	1
Bullock et al. (2019)	2		59.8	0.52	16.7	5.47	0.11	2.36	5	4.23	5.51	0.3	100		52.08	0.38	2.55	9.02	0.3	14.27	20.88	0.43	0	99.91		0.99534	0.00650814	0.327579	0.0761308	0.00155061	0.0585608	0.0891583	0.136496	0.116985	0.00422723	1.81254		0.549142	0.00359062	0.18073	0.0420024	0.00085549	0.0323088	0.0491898	0.0753065	0.0645423	0.00233222	1
Bullock et al. (2019)	2		59.8	0.52	16.7	5.47	0.11	2.36	5	4.23	5.51	0.3	100		53.1	0.47	3.21	7.09	0.15	14.17	21.37	0.31	0	99.87		0.99534	0.00650814	0.327579	0.0761308	0.00155061	0.0585608	0.0891583	0.136496	0.116985	0.00422723	1.81254		0.549142	0.00359062	0.18073	0.0420024	0.00085549	0.0323088	0.0491898	0.0753065	0.0645423	0.00233222	1
Bullock et al. (2019)	2		59.8	0.52	16.7	5.47	0.11	2.36	5	4.23	5.51	0.3	100		52.07	0.4	2.01	9.66	0.46	14.04	21.04	0.47	0	100.15		0.99534	0.00650814	0.327579	0.0761308	0.00155061	0.0585608	0.0891583	0.136496	0.116985	0.00422723	1.81254		0.549142	0.00359062	0.18073	0.0420024	0.00085549	0.0323088	0.0491898	0.0753065	0.0645423	0.00233222	1
Bullock et al. (2019)	2		59.8	0.52	16.7	5.47	0.11	2.36	5	4.23	5.51	0.3	100		51.11	0.52	2.96	9.06	0.35	13.67	21.3	0.51	0	99.48		0.99534	0.00650814	0.327579	0.0761308	0.00155061	0.0585608	0.0891583	0.136496	0.116985	0.00422723	1.81254		0.549142	0.00359062	0.18073	0.0420024	0.00085549	0.0323088	0.0491898	0.0753065	0.0645423	0.00233222	1
Bullock et al. (2019)	2		59.8	0.52	16.7	5.47	0.11	2.36	5	4.23	5.51	0.3	100		51.62	0.47	2.53	9.16	0.36	13.98	21.48	0.47	0	100.07		0.99534	0.00650814	0.327579	0.0761308	0.00155061	0.0585608	0.0891583	0.136496	0.116985	0.00422723	1.81254		0.549142	0.00359062	0.18073	0.0420024	0.00085549	0.0323088	0.0491898	0.0753065	0.0645423	0.00233222	1
Bullock et al. (2019)	2		59.8	0.52	16.7	5.47	0.11	2.36	5	4.23	5.51	0.3	100		52.22	0.4	2.46	9.78	0.35	13.05	21.75	0.58	0	100.59		0.99534	0.00650814	0.327579	0.0761308	0.00155061	0.0585608	0.0891583	0.136496	0.116985	0.00422723	1.81254		0.549142	0.00359062	0.18073	0.0420024	0.00085549	0.0323088	0.0491898	0.0753065	0.0645423	0.00233222	1
Bullock et al. (2019)	2		59.8	0.52	16.7	5.47	0.11	2.36	5	4.23	5.51	0.3	100		50.9	0.53	2.91	9.51	0.32	13.83	21.22	0.48	0	99.7		0.99534	0.00650814	0.327579	0.0761308	0.00155061	0.0585608	0.0891583	0.136496	0.116985	0.00422723	1.81254		0.549142	0.00359062	0.18073	0.0420024	0.00085549	0.0323088	0.0491898	0.0753065	0.0645423	0.00233222	1
Bullock et al. (2019)	2		59.8	0.52	16.7	5.47	0.11	2.36	5	4.23	5.51	0.3	100		52.42	0.46	3.92	6	0.13	14.73	21.06	0.51	0	99.23		0.99534	0.00650814	0.327579	0.0761308	0.00155061	0.0585608	0.0891583	0.136496	0.116985	0.00422723	1.81254		0.549142	0.00359062	0.18073	0.0420024	0.00085549	0.0323088	0.0491898	0.0753065	0.0645423	0.00233222	1
Bullock et al. (2019)	2		59.8	0.52	16.7	5.47	0.11	2.36	5	4.23	5.51	0.3	100		50.97	0.51	2.88	9.38	0.31	13.89	21.59	0.51	0	100.04		0.99534	0.00650814	0.327579	0.0761308	0.00155061	0.0585608	0.0891583	0.136496	0.116985	0.00422723	1.81254		0.549142	0.00359062	0.18073	0.0420024	0.00085549	0.0323088	0.0491898	0.0753065	0.0645423	0.00233222	1
Bullock et al. (2019)	2		59.8	0.52	16.7	5.47	0.11	2.36	5	4.23	5.51	0.3	100		50.66	0.53	3.43	9.33	0.35	13.58	21.35	0.46	0	99.69		0.99534	0.00650814	0.327579	0.0761308	0.00155061	0.0585608	0.0891583	0.136496	0.116985	0.00422723	1.81254		0.549142	0.00359062	0.18073	0.0420024	0.00085549	0.0323088	0.0491898	0.0753065	0.0645423	0.00233222	1
Bullock et al. (2019)	2		59.8	0.52	16.7	5.47	0.11	2.36	5	4.23	5.51	0.3	100		52.97	0.41	2.9	4.61	0.08	16.22	21.13	0.28	0	98.6		0.99534	0.00650814	0.327579	0.0761308	0.00155061	0.0585608	0.0891583	0.136496	0.116985	0.00422723	1.81254		0.549142	0.00359062	0.18073	0.0420024	0.00085549	0.0323088	0.0491898	0.0753065	0.0645423	0.00233222	1
Bullock et al. (2019)	2		59.8	0.52	16.7	5.47	0.11	2.36	5	4.23	5.51	0.3	100		52.84	0.37	2.87	5.93	0.18	15.57	21.59	0.25	0	99.6		0.99534	0.00650814	0.327579	0.0761308	0.00155061	0.0585608	0.0891583	0.136496	0.116985	0.00422723	1.81254		0.549142	0.00359062	0.18073	0.0420024	0.00085549	0.0323088	0.0491898	0.0753065	0.0645423	0.00233222	1
Bullock et al. (2019)	2		59.8	0.52	16.7	5.47	0.11	2.36	5	4.23	5.51	0.3	100		51.68	0.42	2.8	8.99	0.35	14.25	21.34	0.5	0	100.33		0.99534	0.00650814	0.327579	0.0761308	0.00155061	0.0585608	0.0891583	0.136496	0.116985	0.00422723	1.81254		0.549142	0.00359062	0.18073	0.0420024	0.00085549	0.0323088	0.0491898	0.0753065	0.0645423	0.00233222	1
Bullock et al. (2019)	2		59.8	0.52	16.7	5.47	0.11	2.36	5	4.23	5.51	0.3	100		52.16	0.41	1.93	9.75	0.45	14.23	20.96	0.46	0	100.35		0.99534	0.00650814	0.327579	0.0761308	0.00155061	0.0585608	0.0891583	0.136496	0.116985	0.00422723	1.81254		0.549142	0.00359062	0.18073	0.0420024	0.00085549	0.0323088	0.0491898	0.0753065	0.0645423	0.00233222	1
Bullock et al. (2019)	2		59.8	0.52	16.7	5.47	0.11	2.36	5	4.23	5.51	0.3	100		51.73	0.38	1.99	9.44	0.43	14.18	20.73	0.47	0	99.35		0.99534	0.00650814	0.327579	0.0761308	0.00155061	0.0585608	0.0891583	0.136496	0.116985	0.00422723	1.81254		0.549142	0.00359062	0.18073	0.0420024	0.00085549	0.0323088	0.0491898	0.0753065	0.0645423	0.00233222	1
Bullock et al. (2019)	2		59.8	0.52	16.7	5.47	0.11	2.36	5	4.23	5.51	0.3	100		51.06	0.52	2.87	9.23	0.35	13.76	21.3	0.47	0	99.56		0.99534	0.00650814	0.327579	0.0761308	0.00155061	0.0585608	0.0891583	0.136496	0.116985	0.00422723	1.81254		0.549142	0.00359062	0.18073	0.0420024	0.00085549	0.0323088	0.0491898	0.0753065	0.0645423	0.00233222	1
Bullock et al. (2019)	2		59.8	0.52	16.7	5.47	0.11	2.36	5	4.23	5.51	0.3	100		51.6	0.4	2.59	8.96	0.33	14.1	21.35	0.41	0	99.74		0.99534	0.00650814	0.327579	0.0761308	0.00155061	0.0585608	0.0891583	0.136496	0.116985	0.00422723	1.81254		0.549142	0.00359062	0.18073	0.0420024	0.00085549	0.0323088	0.0491898	0.0753065	0.0645423	0.00233222	1
Bullock et al. (2019)	2		59.8	0.52	16.7	5.47	0.11	2.36	5	4.23	5.51	0.3	100		51.04	0.4	2.94	8.12	0.25	14.53	21.67	0.4	0	99.35		0.99534	0.00650814	0.327579	0.0761308	0.00155061	0.0585608	0.0891583	0.136496	0.116985	0.00422723	1.81254		0.549142	0.00359062	0.18073	0.0420024	0.00085549	0.0323088	0.0491898	0.0753065	0.0645423	0.00233222	1
Bullock et al. (2019)	2		59.8	0.52	16.7	5.47	0.11	2.36	5	4.23	5.51	0.3	100		51.66	0.54	2.65	9.35	0.28	14.08	21.42	0.4	0	100.38		0.99534	0.00650814	0.327579	0.0761308	0.00155061	0.0585608	0.0891583	0.136496	0.116985	0.00422723	1.81254		0.549142	0.00359062	0.18073	0.0420024	0.00085549	0.0323088	0.0491898	0.0753065	0.0645423	0.00233222	1
Bullock et al. (2019)	2		59.8	0.52	16.7	5.47	0.11	2.36	5	4.23	5.51	0.3	100		51.18	0.44	2.85	9.22	0.33	14.2	21.21	0.44	0	99.87		0.99534	0.00650814	0.327579	0.0761308	0.00155061	0.0585608	0.0891583	0.136496	0.116985	0.00422723	1.81254		0.549142	0.00359062	0.18073	0.0420024	0.00085549	0.0323088	0.0491898	0.0753065	0.0645423	0.00233222	1
Bullock et al. (2019)	2		59.8	0.52	16.7	5.47	0.11	2.36	5	4.23	5.51	0.3	100		50.65	0.62	3.35	9.55	0.33	13.46	21.27	0.5	0	99.73		0.99534	0.00650814	0.327579	0.0761308	0.00155061	0.0585608	0.0891583	0.136496	0.116985	0.00422723	1.81254		0.549142	0.00359062	0.18073	0.0420024	0.00085549	0.0323088	0.0491898	0.0753065	0.0645423	0.00233222	1
Bullock et al. (2019)	2		59.8	0.52	16.7	5.47	0.11	2.36	5	4.23	5.51	0.3	100		51.03	0.49	3.7	8.01	0.23	13.97	22.01	0.31	0	99.75		0.99534	0.00650814	0.327579	0.0761308	0.00155061	0.0585608	0.0891583	0.136496	0.116985	0.00422723	1.81254		0.549142	0.00359062	0.18073	0.0420024	0.00085549	0.0323088	0.0491898	0.0753065	0.0645423	0.00233222	1
Bullock et al. (2019)	2		59.8	0.52	16.7	5.47	0.11	2.36	5	4.23	5.51	0.3	100		51.5	0.45	2.57	8.4	0.3	14.5	21.98	0.41	0	100.11		0.99534	0.00650814	0.327579	0.0761308	0.00155061	0.0585608	0.0891583	0.136496	0.116985	0.00422723	1.81254		0.549142	0.00359062	0.18073	0.0420024	0.00085549	0.0323088	0.0491898	0.0753065	0.0645423	0.00233222	1
Bullock et al. (2019)	2		59.8	0.52	16.7	5.47	0.11	2.36	5	4.23	5.51	0.3	100		52.22	0.34	1.89	9.4	0.4	14.44	20.85	0.44	0	99.98		0.99534	0.00650814	0.327579	0.0761308	0.00155061	0.0585608	0.0891583	0.136496	0.116985	0.00422723	1.81254		0.549142	0.00359062	0.18073	0.0420024	0.00085549	0.0323088	0.0491898	0.0753065	0.0645423	0.00233222	1
Bullock et al. (2019)	2		59.8	0.52	16.7	5.47	0.11	2.36	5	4.23	5.51	0.3	100		51.52	0.39	3.03	7.86	0.27	14.48	21.99	0.4	0	99.94		0.99534	0.00650814	0.327579	0.0761308	0.00155061	0.0585608	0.0891583	0.136496	0.116985	0.00422723	1.81254		0.549142	0.00359062	0.18073	0.0420024	0.00085549	0.0323088	0.0491898	0.0753065	0.0645423	0.00233222	1
Bullock et al. (2019)	2		59.8	0.52	16.7	5.47	0.11	2.36	5	4.23	5.51	0.3	100		51.16	0.51	2.84	9.19	0.3	13.91	21.53	0.45	0	99.89		0.99534	0.00650814	0.327579	0.0761308	0.00155061	0.0585608	0.0891583	0.136496	0.116985	0.00422723	1.81254		0.549142	0.00359062	0.18073	0.0420024	0.00085549	0.0323088	0.0491898	0.0753065	0.0645423	0.00233222	1
Bullock et al. (2019)	2		59.8	0.52	16.7	5.47	0.11	2.36	5	4.23	5.51	0.3	100		50.31	0.64	3.74	9.14	0.29	13.6	21.41	0.46	0	99.59		0.99534	0.00650814	0.327579	0.0761308	0.00155061	0.0585608	0.0891583	0.136496	0.116985	0.00422723	1.81254		0.549142	0.00359062	0.18073	0.0420024	0.00085549	0.0323088	0.0491898	0.0753065	0.0645423	0.00233222	1
Bullock et al. (2019)	2		59.8	0.52	16.7	5.47	0.11	2.36	5	4.23	5.51	0.3	100		51.18	0.53	2.94	9.13	0.28	13.95	21.37	0.44	0	99.82		0.99534	0.00650814	0.327579	0.0761308	0.00155061	0.0585608	0.0891583	0.136496	0.116985	0.00422723	1.81254		0.549142	0.00359062	0.18073	0.0420024	0.00085549	0.0323088	0.0491898	0.0753065	0.0645423	0.00233222	1
Bullock et al. (2019)	2		59.8	0.52	16.7	5.47	0.11	2.36	5	4.23	5.51	0.3	100		50.38	0.59	3.4	8.95	0.3	13.93	21.5	0.47	0	99.52		0.99534	0.00650814	0.327579	0.0761308	0.00155061	0.0585608	0.0891583	0.136496	0.116985	0.00422723	1.81254		0.549142	0.00359062	0.18073	0.0420024	0.00085549	0.0323088	0.0491898	0.0753065	0.0645423	0.00233222	1
Bullock et al. (2019)	2		59.8	0.52	16.7	5.47	0.11	2.36	5	4.23	5.51	0.3	100		50.72	0.6	3.17	9.4	0.32	13.71	21.63	0.48	0	100.03		0.99534	0.00650814	0.327579	0.0761308	0.00155061	0.0585608	0.0891583	0.136496	0.116985	0.00422723	1.81254		0.549142	0.00359062	0.18073	0.0420024	0.00085549	0.0323088	0.0491898	0.0753065	0.0645423	0.00233222	1
Bullock et al. (2019)	2		59.8	0.52	16.7	5.47	0.11	2.36	5	4.23	5.51	0.3	100		51.25	0.29	3.63	9.96	0.13	13.83	21.05	0.19	0	100.33		0.99534	0.00650814	0.327579	0.0761308	0.00155061	0.0585608	0.0891583	0.136496	0.116985	0.00422723	1.81254		0.549142	0.00359062	0.18073	0.0420024	0.00085549	0.0323088	0.0491898	0.0753065	0.0645423	0.00233222	1
Bullock et al. (2019)	2		59.8	0.52	16.7	5.47	0.11	2.36	5	4.23	5.51	0.3	100		50.77	0.6	3.59	9.53	0.31	13.51	21.57	0.48	0	100.36		0.99534	0.00650814	0.327579	0.0761308	0.00155061	0.0585608	0.0891583	0.136496	0.116985	0.00422723	1.81254		0.549142	0.00359062	0.18073	0.0420024	0.00085549	0.0323088	0.0491898	0.0753065	0.0645423	0.00233222	1
Bullock et al. (2019)	2		59.8	0.52	16.7	5.47	0.11	2.36	5	4.23	5.51	0.3	100		50.99	0.51	3.26	9.05	0.3	13.99	21.46	0.43	0	99.99		0.99534	0.00650814	0.327579	0.0761308	0.00155061	0.0585608	0.0891583	0.136496	0.116985	0.00422723	1.81254		0.549142	0.00359062	0.18073	0.0420024	0.00085549	0.0323088	0.0491898	0.0753065	0.0645423	0.00233222	1
Bullock et al. (2019)	2		59.8	0.52	16.7	5.47	0.11	2.36	5	4.23	5.51	0.3	100		50.83	0.59	2.99	9.75	0.32	13.81	21.32	0.45	0	100.06		0.99534	0.00650814	0.327579	0.0761308	0.00155061	0.0585608	0.0891583	0.136496	0.116985	0.00422723	1.81254		0.549142	0.00359062	0.18073	0.0420024	0.00085549	0.0323088	0.0491898	0.0753065	0.0645423	0.00233222	1
Bullock et al. (2019)	2		59.8	0.52	16.7	5.47	0.11	2.36	5	4.23	5.51	0.3	100		51.64	0.43	2.6	9.04	0.33	13.94	21.26	0.44	0	99.68		0.99534	0.00650814	0.327579	0.0761308	0.00155061	0.0585608	0.0891583	0.136496	0.116985	0.00422723	1.81254		0.549142	0.00359062	0.18073	0.0420024	0.00085549	0.0323088	0.0491898	0.0753065	0.0645423	0.00233222	1
Bullock et al. (2019)	2		59.8	0.52	16.7	5.47	0.11	2.36	5	4.23	5.51	0.3	100		51.23	0.52	2.76	8.91	0.34	14.12	21.74	0.44	0	100.06		0.99534	0.00650814	0.327579	0.0761308	0.00155061	0.0585608	0.0891583	0.136496	0.116985	0.00422723	1.81254		0.549142	0.00359062	0.18073	0.0420024	0.00085549	0.0323088	0.0491898	0.0753065	0.0645423	0.00233222	1
Bullock et al. (2019)	2		59.8	0.52	16.7	5.47	0.11	2.36	5	4.23	5.51	0.3	100		51.22	0.39	2.5	8.81	0.33	14.3	21.72	0.43	0	99.7		0.99534	0.00650814	0.327579	0.0761308	0.00155061	0.0585608	0.0891583	0.136496	0.116985	0.00422723	1.81254		0.549142	0.00359062	0.18073	0.0420024	0.00085549	0.0323088	0.0491898	0.0753065	0.0645423	0.00233222	1
Bullock et al. (2019)	2		59.8	0.52	16.7	5.47	0.11	2.36	5	4.23	5.51	0.3	100		51.65	0.49	2.75	9.16	0.31	13.78	21.29	0.48	0	99.91		0.99534	0.00650814	0.327579	0.0761308	0.00155061	0.0585608	0.0891583	0.136496	0.116985	0.00422723	1.81254		0.549142	0.00359062	0.18073	0.0420024	0.00085549	0.0323088	0.0491898	0.0753065	0.0645423	0.00233222	1
Bullock et al. (2019)	2		59.8	0.52	16.7	5.47	0.11	2.36	5	4.23	5.51	0.3	100		51.58	0.52	3.2	8.6	0.27	14.15	21.97	0.45	0	100.74		0.99534	0.00650814	0.327579	0.0761308	0.00155061	0.0585608	0.0891583	0.136496	0.116985	0.00422723	1.81254		0.549142	0.00359062	0.18073	0.0420024	0.00085549	0.0323088	0.0491898	0.0753065	0.0645423	0.00233222	1
Bullock et al. (2019)	2		59.8	0.52	16.7	5.47	0.11	2.36	5	4.23	5.51	0.3	100		51.07	0.59	4	7.82	0.19	14.21	22.12	0.37	0	100.37		0.99534	0.00650814	0.327579	0.0761308	0.00155061	0.0585608	0.0891583	0.136496	0.116985	0.00422723	1.81254		0.549142	0.00359062	0.18073	0.0420024	0.00085549	0.0323088	0.0491898	0.0753065	0.0645423	0.00233222	1
Bullock et al. (2019)	2		59.8	0.52	16.7	5.47	0.11	2.36	5	4.23	5.51	0.3	100		52.2	0.51	3.17	9.28	0.3	13.84	21.56	0.46	0	101.32		0.99534	0.00650814	0.327579	0.0761308	0.00155061	0.0585608	0.0891583	0.136496	0.116985	0.00422723	1.81254		0.549142	0.00359062	0.18073	0.0420024	0.00085549	0.0323088	0.0491898	0.0753065	0.0645423	0.00233222	1
Bullock et al. (2019)	2		59.8	0.52	16.7	5.47	0.11	2.36	5	4.23	5.51	0.3	100		51.82	0.46	2.52	7.9	0.21	14.68	22.25	0.37	0	100.21		0.99534	0.00650814	0.327579	0.0761308	0.00155061	0.0585608	0.0891583	0.136496	0.116985	0.00422723	1.81254		0.549142	0.00359062	0.18073	0.0420024	0.00085549	0.0323088	0.0491898	0.0753065	0.0645423	0.00233222	1
Bullock et al. (2019)	2		59.8	0.52	16.7	5.47	0.11	2.36	5	4.23	5.51	0.3	100		51.3	0.57	3.56	8.34	0.27	13.85	22.08	0.48	0	100.45		0.99534	0.00650814	0.327579	0.0761308	0.00155061	0.0585608	0.0891583	0.136496	0.116985	0.00422723	1.81254		0.549142	0.00359062	0.18073	0.0420024	0.00085549	0.0323088	0.0491898	0.0753065	0.0645423	0.00233222	1
Bullock et al. (2019)	2		59.8	0.52	16.7	5.47	0.11	2.36	5	4.23	5.51	0.3	100		51.67	0.53	3.23	8.74	0.3	13.94	21.9	0.45	0	100.76		0.99534	0.00650814	0.327579	0.0761308	0.00155061	0.0585608	0.0891583	0.136496	0.116985	0.00422723	1.81254		0.549142	0.00359062	0.18073	0.0420024	0.00085549	0.0323088	0.0491898	0.0753065	0.0645423	0.00233222	1
Bullock et al. (2019)	2		59.8	0.52	16.7	5.47	0.11	2.36	5	4.23	5.51	0.3	100		51.51	0.69	3.74	8.82	0.2	13.59	21.61	0.48	0	100.64		0.99534	0.00650814	0.327579	0.0761308	0.00155061	0.0585608	0.0891583	0.136496	0.116985	0.00422723	1.81254		0.549142	0.00359062	0.18073	0.0420024	0.00085549	0.0323088	0.0491898	0.0753065	0.0645423	0.00233222	1
Bullock et al. (2019)	2		59.8	0.52	16.7	5.47	0.11	2.36	5	4.23	5.51	0.3	100		51.31	0.65	3.27	8.55	0.28	13.77	22.17	0.43	0	100.43		0.99534	0.00650814	0.327579	0.0761308	0.00155061	0.0585608	0.0891583	0.136496	0.116985	0.00422723	1.81254		0.549142	0.00359062	0.18073	0.0420024	0.00085549	0.0323088	0.0491898	0.0753065	0.0645423	0.00233222	1
Clinopyroxene in Trachyte	2		61.4	0.44	17.2	4.52	0.1	1.67	4	4.46	5.88	0.29	99.96
Bullock et al. (2019)	2		61.4	0.44	17.2	4.52	0.1	1.67	4	4.46	5.88	0.29	99.96		51.81	0.59	3.45	8.61	0.24	13.94	21.99	0.47	0	101.1		1.02197	0.00550688	0.337387	0.0629088	0.00140964	0.0414392	0.0713267	0.143917	0.124841	0.00408632	1.81479		0.563133	0.00303444	0.185909	0.0346645	0.000776751	0.0228341	0.0393029	0.0793023	0.0687906	0.00225167	1
Bullock et al. (2019)	2		61.4	0.44	17.2	4.52	0.1	1.67	4	4.46	5.88	0.29	99.96		51.49	0.6	3.61	8.48	0.26	13.92	22.04	0.46	0	100.86		1.02197	0.00550688	0.337387	0.0629088	0.00140964	0.0414392	0.0713267	0.143917	0.124841	0.00408632	1.81479		0.563133	0.00303444	0.185909	0.0346645	0.000776751	0.0228341	0.0393029	0.0793023	0.0687906	0.00225167	1
Bullock et al. (2019)	2		61.4	0.44	17.2	4.52	0.1	1.67	4	4.46	5.88	0.29	99.96		51.75	0.58	3.9	8.72	0.26	13.72	20.92	0.43	0	100.28		1.02197	0.00550688	0.337387	0.0629088	0.00140964	0.0414392	0.0713267	0.143917	0.124841	0.00408632	1.81479		0.563133	0.00303444	0.185909	0.0346645	0.000776751	0.0228341	0.0393029	0.0793023	0.0687906	0.00225167	1
Bullock et al. (2019)	2		61.4	0.44	17.2	4.52	0.1	1.67	4	4.46	5.88	0.29	99.96		51.38	0.34	2.43	9.1	0.3	14.23	20.18	0.43	0	98.39		1.02197	0.00550688	0.337387	0.0629088	0.00140964	0.0414392	0.0713267	0.143917	0.124841	0.00408632	1.81479		0.563133	0.00303444	0.185909	0.0346645	0.000776751	0.0228341	0.0393029	0.0793023	0.0687906	0.00225167	1
Bullock et al. (2019)	2		61.4	0.44	17.2	4.52	0.1	1.67	4	4.46	5.88	0.29	99.96		51.26	0.54	3.67	8.53	0.23	13.95	20.48	0.47	0	99.13		1.02197	0.00550688	0.337387	0.0629088	0.00140964	0.0414392	0.0713267	0.143917	0.124841	0.00408632	1.81479		0.563133	0.00303444	0.185909	0.0346645	0.000776751	0.0228341	0.0393029	0.0793023	0.0687906	0.00225167	1
Bullock et al. (2019)	2		61.4	0.44	17.2	4.52	0.1	1.67	4	4.46	5.88	0.29	99.96		50.67	0.36	2.68	8.96	0.27	14.28	20.3	0.48	0	98		1.02197	0.00550688	0.337387	0.0629088	0.00140964	0.0414392	0.0713267	0.143917	0.124841	0.00408632	1.81479		0.563133	0.00303444	0.185909	0.0346645	0.000776751	0.0228341	0.0393029	0.0793023	0.0687906	0.00225167	1
Bullock et al. (2019)	2		61.4	0.44	17.2	4.52	0.1	1.67	4	4.46	5.88	0.29	99.96		51.91	0.57	3.6	8.66	0.22	13.7	20.78	0.46	0	99.9		1.02197	0.00550688	0.337387	0.0629088	0.00140964	0.0414392	0.0713267	0.143917	0.124841	0.00408632	1.81479		0.563133	0.00303444	0.185909	0.0346645	0.000776751	0.0228341	0.0393029	0.0793023	0.0687906	0.00225167	1
Bullock et al. (2019)	2		61.4	0.44	17.2	4.52	0.1	1.67	4	4.46	5.88	0.29	99.96		52.08	0.38	2.55	9.02	0.3	14.27	20.88	0.43	0	99.91		1.02197	0.00550688	0.337387	0.0629088	0.00140964	0.0414392	0.0713267	0.143917	0.124841	0.00408632	1.81479		0.563133	0.00303444	0.185909	0.0346645	0.000776751	0.0228341	0.0393029	0.0793023	0.0687906	0.00225167	1
Bullock et al. (2019)	2		61.4	0.44	17.2	4.52	0.1	1.67	4	4.46	5.88	0.29	99.96		53.1	0.47	3.21	7.09	0.15	14.17	21.37	0.31	0	99.87		1.02197	0.00550688	0.337387	0.0629088	0.00140964	0.0414392	0.0713267	0.143917	0.124841	0.00408632	1.81479		0.563133	0.00303444	0.185909	0.0346645	0.000776751	0.0228341	0.0393029	0.0793023	0.0687906	0.00225167	1
Bullock et al. (2019)	2		61.4	0.44	17.2	4.52	0.1	1.67	4	4.46	5.88	0.29	99.96		52.07	0.4	2.01	9.66	0.46	14.04	21.04	0.47	0	100.15		1.02197	0.00550688	0.337387	0.0629088	0.00140964	0.0414392	0.0713267	0.143917	0.124841	0.00408632	1.81479		0.563133	0.00303444	0.185909	0.0346645	0.000776751	0.0228341	0.0393029	0.0793023	0.0687906	0.00225167	1
Bullock et al. (2019)	2		61.4	0.44	17.2	4.52	0.1	1.67	4	4.46	5.88	0.29	99.96		51.11	0.52	2.96	9.06	0.35	13.67	21.3	0.51	0	99.48		1.02197	0.00550688	0.337387	0.0629088	0.00140964	0.0414392	0.0713267	0.143917	0.124841	0.00408632	1.81479		0.563133	0.00303444	0.185909	0.0346645	0.000776751	0.0228341	0.0393029	0.0793023	0.0687906	0.00225167	1
Bullock et al. (2019)	2		61.4	0.44	17.2	4.52	0.1	1.67	4	4.46	5.88	0.29	99.96		51.62	0.47	2.53	9.16	0.36	13.98	21.48	0.47	0	100.07		1.02197	0.00550688	0.337387	0.0629088	0.00140964	0.0414392	0.0713267	0.143917	0.124841	0.00408632	1.81479		0.563133	0.00303444	0.185909	0.0346645	0.000776751	0.0228341	0.0393029	0.0793023	0.0687906	0.00225167	1
Bullock et al. (2019)	2		61.4	0.44	17.2	4.52	0.1	1.67	4	4.46	5.88	0.29	99.96		52.22	0.4	2.46	9.78	0.35	13.05	21.75	0.58	0	100.59		1.02197	0.00550688	0.337387	0.0629088	0.00140964	0.0414392	0.0713267	0.143917	0.124841	0.00408632	1.81479		0.563133	0.00303444	0.185909	0.0346645	0.000776751	0.0228341	0.0393029	0.0793023	0.0687906	0.00225167	1
Bullock et al. (2019)	2		61.4	0.44	17.2	4.52	0.1	1.67	4	4.46	5.88	0.29	99.96		50.9	0.53	2.91	9.51	0.32	13.83	21.22	0.48	0	99.7		1.02197	0.00550688	0.337387	0.0629088	0.00140964	0.0414392	0.0713267	0.143917	0.124841	0.00408632	1.81479		0.563133	0.00303444	0.185909	0.0346645	0.000776751	0.0228341	0.0393029	0.0793023	0.0687906	0.00225167	1
Bullock et al. (2019)	2		61.4	0.44	17.2	4.52	0.1	1.67	4	4.46	5.88	0.29	99.96		52.42	0.46	3.92	6	0.13	14.73	21.06	0.51	0	99.23		1.02197	0.00550688	0.337387	0.0629088	0.00140964	0.0414392	0.0713267	0.143917	0.124841	0.00408632	1.81479		0.563133	0.00303444	0.185909	0.0346645	0.000776751	0.0228341	0.0393029	0.0793023	0.0687906	0.00225167	1
Bullock et al. (2019)	2		61.4	0.44	17.2	4.52	0.1	1.67	4	4.46	5.88	0.29	99.96		50.97	0.51	2.88	9.38	0.31	13.89	21.59	0.51	0	100.04		1.02197	0.00550688	0.337387	0.0629088	0.00140964	0.0414392	0.0713267	0.143917	0.124841	0.00408632	1.81479		0.563133	0.00303444	0.185909	0.0346645	0.000776751	0.0228341	0.0393029	0.0793023	0.0687906	0.00225167	1
Bullock et al. (2019)	2		61.4	0.44	17.2	4.52	0.1	1.67	4	4.46	5.88	0.29	99.96		50.66	0.53	3.43	9.33	0.35	13.58	21.35	0.46	0	99.69		1.02197	0.00550688	0.337387	0.0629088	0.00140964	0.0414392	0.0713267	0.143917	0.124841	0.00408632	1.81479		0.563133	0.00303444	0.185909	0.0346645	0.000776751	0.0228341	0.0393029	0.0793023	0.0687906	0.00225167	1
Bullock et al. (2019)	2		61.4	0.44	17.2	4.52	0.1	1.67	4	4.46	5.88	0.29	99.96		52.97	0.41	2.9	4.61	0.08	16.22	21.13	0.28	0	98.6		1.02197	0.00550688	0.337387	0.0629088	0.00140964	0.0414392	0.0713267	0.143917	0.124841	0.00408632	1.81479		0.563133	0.00303444	0.185909	0.0346645	0.000776751	0.0228341	0.0393029	0.0793023	0.0687906	0.00225167	1
Bullock et al. (2019)	2		61.4	0.44	17.2	4.52	0.1	1.67	4	4.46	5.88	0.29	99.96		52.84	0.37	2.87	5.93	0.18	15.57	21.59	0.25	0	99.6		1.02197	0.00550688	0.337387	0.0629088	0.00140964	0.0414392	0.0713267	0.143917	0.124841	0.00408632	1.81479		0.563133	0.00303444	0.185909	0.0346645	0.000776751	0.0228341	0.0393029	0.0793023	0.0687906	0.00225167	1
Bullock et al. (2019)	2		61.4	0.44	17.2	4.52	0.1	1.67	4	4.46	5.88	0.29	99.96		51.68	0.42	2.8	8.99	0.35	14.25	21.34	0.5	0	100.33		1.02197	0.00550688	0.337387	0.0629088	0.00140964	0.0414392	0.0713267	0.143917	0.124841	0.00408632	1.81479		0.563133	0.00303444	0.185909	0.0346645	0.000776751	0.0228341	0.0393029	0.0793023	0.0687906	0.00225167	1
Bullock et al. (2019)	2		61.4	0.44	17.2	4.52	0.1	1.67	4	4.46	5.88	0.29	99.96		52.16	0.41	1.93	9.75	0.45	14.23	20.96	0.46	0	100.35		1.02197	0.00550688	0.337387	0.0629088	0.00140964	0.0414392	0.0713267	0.143917	0.124841	0.00408632	1.81479		0.563133	0.00303444	0.185909	0.0346645	0.000776751	0.0228341	0.0393029	0.0793023	0.0687906	0.00225167	1
Bullock et al. (2019)	2		61.4	0.44	17.2	4.52	0.1	1.67	4	4.46	5.88	0.29	99.96		51.73	0.38	1.99	9.44	0.43	14.18	20.73	0.47	0	99.35		1.02197	0.00550688	0.337387	0.0629088	0.00140964	0.0414392	0.0713267	0.143917	0.124841	0.00408632	1.81479		0.563133	0.00303444	0.185909	0.0346645	0.000776751	0.0228341	0.0393029	0.0793023	0.0687906	0.00225167	1
Bullock et al. (2019)	2		61.4	0.44	17.2	4.52	0.1	1.67	4	4.46	5.88	0.29	99.96		51.06	0.52	2.87	9.23	0.35	13.76	21.3	0.47	0	99.56		1.02197	0.00550688	0.337387	0.0629088	0.00140964	0.0414392	0.0713267	0.143917	0.124841	0.00408632	1.81479		0.563133	0.00303444	0.185909	0.0346645	0.000776751	0.0228341	0.0393029	0.0793023	0.0687906	0.00225167	1
Bullock et al. (2019)	2		61.4	0.44	17.2	4.52	0.1	1.67	4	4.46	5.88	0.29	99.96		51.6	0.4	2.59	8.96	0.33	14.1	21.35	0.41	0	99.74		1.02197	0.00550688	0.337387	0.0629088	0.00140964	0.0414392	0.0713267	0.143917	0.124841	0.00408632	1.81479		0.563133	0.00303444	0.185909	0.0346645	0.000776751	0.0228341	0.0393029	0.0793023	0.0687906	0.00225167	1
Bullock et al. (2019)	2		61.4	0.44	17.2	4.52	0.1	1.67	4	4.46	5.88	0.29	99.96		51.04	0.4	2.94	8.12	0.25	14.53	21.67	0.4	0	99.35		1.02197	0.00550688	0.337387	0.0629088	0.00140964	0.0414392	0.0713267	0.143917	0.124841	0.00408632	1.81479		0.563133	0.00303444	0.185909	0.0346645	0.000776751	0.0228341	0.0393029	0.0793023	0.0687906	0.00225167	1
Bullock et al. (2019)	2		61.4	0.44	17.2	4.52	0.1	1.67	4	4.46	5.88	0.29	99.96		51.66	0.54	2.65	9.35	0.28	14.08	21.42	0.4	0	100.38		1.02197	0.00550688	0.337387	0.0629088	0.00140964	0.0414392	0.0713267	0.143917	0.124841	0.00408632	1.81479		0.563133	0.00303444	0.185909	0.0346645	0.000776751	0.0228341	0.0393029	0.0793023	0.0687906	0.00225167	1
Bullock et al. (2019)	2		61.4	0.44	17.2	4.52	0.1	1.67	4	4.46	5.88	0.29	99.96		51.18	0.44	2.85	9.22	0.33	14.2	21.21	0.44	0	99.87		1.02197	0.00550688	0.337387	0.0629088	0.00140964	0.0414392	0.0713267	0.143917	0.124841	0.00408632	1.81479		0.563133	0.00303444	0.185909	0.0346645	0.000776751	0.0228341	0.0393029	0.0793023	0.0687906	0.00225167	1
Bullock et al. (2019)	2		61.4	0.44	17.2	4.52	0.1	1.67	4	4.46	5.88	0.29	99.96		50.65	0.62	3.35	9.55	0.33	13.46	21.27	0.5	0	99.73		1.02197	0.00550688	0.337387	0.0629088	0.00140964	0.0414392	0.0713267	0.143917	0.124841	0.00408632	1.81479		0.563133	0.00303444	0.185909	0.0346645	0.000776751	0.0228341	0.0393029	0.0793023	0.0687906	0.00225167	1
Bullock et al. (2019)	2		61.4	0.44	17.2	4.52	0.1	1.67	4	4.46	5.88	0.29	99.96		51.03	0.49	3.7	8.01	0.23	13.97	22.01	0.31	0	99.75		1.02197	0.00550688	0.337387	0.0629088	0.00140964	0.0414392	0.0713267	0.143917	0.124841	0.00408632	1.81479		0.563133	0.00303444	0.185909	0.0346645	0.000776751	0.0228341	0.0393029	0.0793023	0.0687906	0.00225167	1
Bullock et al. (2019)	2		61.4	0.44	17.2	4.52	0.1	1.67	4	4.46	5.88	0.29	99.96		51.5	0.45	2.57	8.4	0.3	14.5	21.98	0.41	0	100.11		1.02197	0.00550688	0.337387	0.0629088	0.00140964	0.0414392	0.0713267	0.143917	0.124841	0.00408632	1.81479		0.563133	0.00303444	0.185909	0.0346645	0.000776751	0.0228341	0.0393029	0.0793023	0.0687906	0.00225167	1
Bullock et al. (2019)	2		61.4	0.44	17.2	4.52	0.1	1.67	4	4.46	5.88	0.29	99.96		52.22	0.34	1.89	9.4	0.4	14.44	20.85	0.44	0	99.98		1.02197	0.00550688	0.337387	0.0629088	0.00140964	0.0414392	0.0713267	0.143917	0.124841	0.00408632	1.81479		0.563133	0.00303444	0.185909	0.0346645	0.000776751	0.0228341	0.0393029	0.0793023	0.0687906	0.00225167	1
Bullock et al. (2019)	2		61.4	0.44	17.2	4.52	0.1	1.67	4	4.46	5.88	0.29	99.96		51.52	0.39	3.03	7.86	0.27	14.48	21.99	0.4	0	99.94		1.02197	0.00550688	0.337387	0.0629088	0.00140964	0.0414392	0.0713267	0.143917	0.124841	0.00408632	1.81479		0.563133	0.00303444	0.185909	0.0346645	0.000776751	0.0228341	0.0393029	0.0793023	0.0687906	0.00225167	1
Bullock et al. (2019)	2		61.4	0.44	17.2	4.52	0.1	1.67	4	4.46	5.88	0.29	99.96		51.16	0.51	2.84	9.19	0.3	13.91	21.53	0.45	0	99.89		1.02197	0.00550688	0.337387	0.0629088	0.00140964	0.0414392	0.0713267	0.143917	0.124841	0.00408632	1.81479		0.563133	0.00303444	0.185909	0.0346645	0.000776751	0.0228341	0.0393029	0.0793023	0.0687906	0.00225167	1
Bullock et al. (2019)	2		61.4	0.44	17.2	4.52	0.1	1.67	4	4.46	5.88	0.29	99.96		50.31	0.64	3.74	9.14	0.29	13.6	21.41	0.46	0	99.59		1.02197	0.00550688	0.337387	0.0629088	0.00140964	0.0414392	0.0713267	0.143917	0.124841	0.00408632	1.81479		0.563133	0.00303444	0.185909	0.0346645	0.000776751	0.0228341	0.0393029	0.0793023	0.0687906	0.00225167	1
Bullock et al. (2019)	2		61.4	0.44	17.2	4.52	0.1	1.67	4	4.46	5.88	0.29	99.96		51.18	0.53	2.94	9.13	0.28	13.95	21.37	0.44	0	99.82		1.02197	0.00550688	0.337387	0.0629088	0.00140964	0.0414392	0.0713267	0.143917	0.124841	0.00408632	1.81479		0.563133	0.00303444	0.185909	0.0346645	0.000776751	0.0228341	0.0393029	0.0793023	0.0687906	0.00225167	1
Bullock et al. (2019)	2		61.4	0.44	17.2	4.52	0.1	1.67	4	4.46	5.88	0.29	99.96		50.38	0.59	3.4	8.95	0.3	13.93	21.5	0.47	0	99.52		1.02197	0.00550688	0.337387	0.0629088	0.00140964	0.0414392	0.0713267	0.143917	0.124841	0.00408632	1.81479		0.563133	0.00303444	0.185909	0.0346645	0.000776751	0.0228341	0.0393029	0.0793023	0.0687906	0.00225167	1
Bullock et al. (2019)	2		61.4	0.44	17.2	4.52	0.1	1.67	4	4.46	5.88	0.29	99.96		50.72	0.6	3.17	9.4	0.32	13.71	21.63	0.48	0	100.03		1.02197	0.00550688	0.337387	0.0629088	0.00140964	0.0414392	0.0713267	0.143917	0.124841	0.00408632	1.81479		0.563133	0.00303444	0.185909	0.0346645	0.000776751	0.0228341	0.0393029	0.0793023	0.0687906	0.00225167	1
Bullock et al. (2019)	2		61.4	0.44	17.2	4.52	0.1	1.67	4	4.46	5.88	0.29	99.96		51.25	0.29	3.63	9.96	0.13	13.83	21.05	0.19	0	100.33		1.02197	0.00550688	0.337387	0.0629088	0.00140964	0.0414392	0.0713267	0.143917	0.124841	0.00408632	1.81479		0.563133	0.00303444	0.185909	0.0346645	0.000776751	0.0228341	0.0393029	0.0793023	0.0687906	0.00225167	1
Bullock et al. (2019)	2		61.4	0.44	17.2	4.52	0.1	1.67	4	4.46	5.88	0.29	99.96		50.77	0.6	3.59	9.53	0.31	13.51	21.57	0.48	0	100.36		1.02197	0.00550688	0.337387	0.0629088	0.00140964	0.0414392	0.0713267	0.143917	0.124841	0.00408632	1.81479		0.563133	0.00303444	0.185909	0.0346645	0.000776751	0.0228341	0.0393029	0.0793023	0.0687906	0.00225167	1
Bullock et al. (2019)	2		61.4	0.44	17.2	4.52	0.1	1.67	4	4.46	5.88	0.29	99.96		50.99	0.51	3.26	9.05	0.3	13.99	21.46	0.43	0	99.99		1.02197	0.00550688	0.337387	0.0629088	0.00140964	0.0414392	0.0713267	0.143917	0.124841	0.00408632	1.81479		0.563133	0.00303444	0.185909	0.0346645	0.000776751	0.0228341	0.0393029	0.0793023	0.0687906	0.00225167	1
Bullock et al. (2019)	2		61.4	0.44	17.2	4.52	0.1	1.67	4	4.46	5.88	0.29	99.96		50.83	0.59	2.99	9.75	0.32	13.81	21.32	0.45	0	100.06		1.02197	0.00550688	0.337387	0.0629088	0.00140964	0.0414392	0.0713267	0.143917	0.124841	0.00408632	1.81479		0.563133	0.00303444	0.185909	0.0346645	0.000776751	0.0228341	0.0393029	0.0793023	0.0687906	0.00225167	1
Bullock et al. (2019)	2		61.4	0.44	17.2	4.52	0.1	1.67	4	4.46	5.88	0.29	99.96		51.64	0.43	2.6	9.04	0.33	13.94	21.26	0.44	0	99.68		1.02197	0.00550688	0.337387	0.0629088	0.00140964	0.0414392	0.0713267	0.143917	0.124841	0.00408632	1.81479		0.563133	0.00303444	0.185909	0.0346645	0.000776751	0.0228341	0.0393029	0.0793023	0.0687906	0.00225167	1
Bullock et al. (2019)	2		61.4	0.44	17.2	4.52	0.1	1.67	4	4.46	5.88	0.29	99.96		51.23	0.52	2.76	8.91	0.34	14.12	21.74	0.44	0	100.06		1.02197	0.00550688	0.337387	0.0629088	0.00140964	0.0414392	0.0713267	0.143917	0.124841	0.00408632	1.81479		0.563133	0.00303444	0.185909	0.0346645	0.000776751	0.0228341	0.0393029	0.0793023	0.0687906	0.00225167	1
Bullock et al. (2019)	2		61.4	0.44	17.2	4.52	0.1	1.67	4	4.46	5.88	0.29	99.96		51.22	0.39	2.5	8.81	0.33	14.3	21.72	0.43	0	99.7		1.02197	0.00550688	0.337387	0.0629088	0.00140964	0.0414392	0.0713267	0.143917	0.124841	0.00408632	1.81479		0.563133	0.00303444	0.185909	0.0346645	0.000776751	0.0228341	0.0393029	0.0793023	0.0687906	0.00225167	1
Bullock et al. (2019)	2		61.4	0.44	17.2	4.52	0.1	1.67	4	4.46	5.88	0.29	99.96		51.65	0.49	2.75	9.16	0.31	13.78	21.29	0.48	0	99.91		1.02197	0.00550688	0.337387	0.0629088	0.00140964	0.0414392	0.0713267	0.143917	0.124841	0.00408632	1.81479		0.563133	0.00303444	0.185909	0.0346645	0.000776751	0.0228341	0.0393029	0.0793023	0.0687906	0.00225167	1
Bullock et al. (2019)	2		61.4	0.44	17.2	4.52	0.1	1.67	4	4.46	5.88	0.29	99.96		51.58	0.52	3.2	8.6	0.27	14.15	21.97	0.45	0	100.74		1.02197	0.00550688	0.337387	0.0629088	0.00140964	0.0414392	0.0713267	0.143917	0.124841	0.00408632	1.81479		0.563133	0.00303444	0.185909	0.0346645	0.000776751	0.0228341	0.0393029	0.0793023	0.0687906	0.00225167	1
Bullock et al. (2019)	2		61.4	0.44	17.2	4.52	0.1	1.67	4	4.46	5.88	0.29	99.96		51.07	0.59	4	7.82	0.19	14.21	22.12	0.37	0	100.37		1.02197	0.00550688	0.337387	0.0629088	0.00140964	0.0414392	0.0713267	0.143917	0.124841	0.00408632	1.81479		0.563133	0.00303444	0.185909	0.0346645	0.000776751	0.0228341	0.0393029	0.0793023	0.0687906	0.00225167	1
Bullock et al. (2019)	2		61.4	0.44	17.2	4.52	0.1	1.67	4	4.46	5.88	0.29	99.96		52.2	0.51	3.17	9.28	0.3	13.84	21.56	0.46	0	101.32		1.02197	0.00550688	0.337387	0.0629088	0.00140964	0.0414392	0.0713267	0.143917	0.124841	0.00408632	1.81479		0.563133	0.00303444	0.185909	0.0346645	0.000776751	0.0228341	0.0393029	0.0793023	0.0687906	0.00225167	1
Bullock et al. (2019)	2		61.4	0.44	17.2	4.52	0.1	1.67	4	4.46	5.88	0.29	99.96		51.82	0.46	2.52	7.9	0.21	14.68	22.25	0.37	0	100.21		1.02197	0.00550688	0.337387	0.0629088	0.00140964	0.0414392	0.0713267	0.143917	0.124841	0.00408632	1.81479		0.563133	0.00303444	0.185909	0.0346645	0.000776751	0.0228341	0.0393029	0.0793023	0.0687906	0.00225167	1
Bullock et al. (2019)	2		61.4	0.44	17.2	4.52	0.1	1.67	4	4.46	5.88	0.29	99.96		51.3	0.57	3.56	8.34	0.27	13.85	22.08	0.48	0	100.45		1.02197	0.00550688	0.337387	0.0629088	0.00140964	0.0414392	0.0713267	0.143917	0.124841	0.00408632	1.81479		0.563133	0.00303444	0.185909	0.0346645	0.000776751	0.0228341	0.0393029	0.0793023	0.0687906	0.00225167	1
Bullock et al. (2019)	2		61.4	0.44	17.2	4.52	0.1	1.67	4	4.46	5.88	0.29	99.96		51.67	0.53	3.23	8.74	0.3	13.94	21.9	0.45	0	100.76		1.02197	0.00550688	0.337387	0.0629088	0.00140964	0.0414392	0.0713267	0.143917	0.124841	0.00408632	1.81479		0.563133	0.00303444	0.185909	0.0346645	0.000776751	0.0228341	0.0393029	0.0793023	0.0687906	0.00225167	1
Bullock et al. (2019)	2		61.4	0.44	17.2	4.52	0.1	1.67	4	4.46	5.88	0.29	99.96		51.51	0.69	3.74	8.82	0.2	13.59	21.61	0.48	0	100.64		1.02197	0.00550688	0.337387	0.0629088	0.00140964	0.0414392	0.0713267	0.143917	0.124841	0.00408632	1.81479		0.563133	0.00303444	0.185909	0.0346645	0.000776751	0.0228341	0.0393029	0.0793023	0.0687906	0.00225167	1
Bullock et al. (2019)	2		61.4	0.44	17.2	4.52	0.1	1.67	4	4.46	5.88	0.29	99.96		51.31	0.65	3.27	8.55	0.28	13.77	22.17	0.43	0	100.43		1.02197	0.00550688	0.337387	0.0629088	0.00140964	0.0414392	0.0713267	0.143917	0.124841	0.00408632	1.81479		0.563133	0.00303444	0.185909	0.0346645	0.000776751	0.0228341	0.0393029	0.0793023	0.0687906	0.00225167	1
Fulignati et al. (2018)	2		61.4	0.44	17.2	4.52	0.1	1.67	4	4.46	5.88	0.29	99.96		51.4	0.38	2.33	8.1	0.22	14.73	21.95	0.44	0	99.55		1.02197	0.00550688	0.337387	0.0629088	0.00140964	0.0414392	0.0713267	0.143917	0.124841	0.00408632	1.81479		0.563133	0.00303444	0.185909	0.0346645	0.000776751	0.0228341	0.0393029	0.0793023	0.0687906	0.00225167	1
Fulignati et al. (2018)	2		61.4	0.44	17.2	4.52	0.1	1.67	4	4.46	5.88	0.29	99.96		50.08	0.61	3.09	9.52	0.33	13.96	21.44	0.52	0.07	99.62		1.02197	0.00550688	0.337387	0.0629088	0.00140964	0.0414392	0.0713267	0.143917	0.124841	0.00408632	1.81479		0.563133	0.00303444	0.185909	0.0346645	0.000776751	0.0228341	0.0393029	0.0793023	0.0687906	0.00225167	1
[truncated: 42 more columns]

## Sheet: Table S3
																												MW=
																												60.08	79.9	101.96	71.85	70.94	40.3	56.08	61.98	94.2	141.937
																												LIQUID												LIQUID
					Liquid (Glass) Composition - in Weight Percent												Feldspar Compositions - in Weight Percent											CATION PROPORTIONS												CATION FRACTIONS
Data Source			T (°C)		SiO2	TiO2	Al2O3	FeOt	MnO	MgO	CaO	Na2O	K2O	P2O5	Total		SiO2	TiO2	Al2O3	FeOt	MnO	MgO	CaO	Na2O	K2O	Total		SiO2	TiO2	AlO3/2	FeO	MnO	MgO	CaO	NaO0.5	KO0.5	PO5/2	sum		SiO2	TiO2	AlO3/2	FeO	MnO	MgO	CaO	NaO0.5	KO0.5	PO5/2
Palizzi Trachyte - VP2 Plag3		profile	1008
Nicotra et al. (2018)		0	1008		61.4	0.44	17.2	4.52	0.1	1.67	4	4.46	5.88	0.29	99.96		55.58	0.28	27.45	0.79	0.16	0.37	9.46	4.42	1.39	99.9		1.02197	0.00550688	0.337387	0.0629088	0.00140964	0.0414392	0.0713267	0.143917	0.124841	0.00408632	1.81479		0.563133	0.00303444	0.185909	0.0346645	0.000776751	0.0228341	0.0393029	0.0793023	0.0687906	0.00225167
Nicotra et al. (2018)		7	1008		61.4	0.44	17.2	4.52	0.1	1.67	4	4.46	5.88	0.29	99.96		54.88	0.37	27.29	0.78	0.2	0.27	10.41	4.43	1.15	99.78		1.02197	0.00550688	0.337387	0.0629088	0.00140964	0.0414392	0.0713267	0.143917	0.124841	0.00408632	1.81479		0.563133	0.00303444	0.185909	0.0346645	0.000776751	0.0228341	0.0393029	0.0793023	0.0687906	0.00225167
Nicotra et al. (2018)		14	1008		61.4	0.44	17.2	4.52	0.1	1.67	4	4.46	5.88	0.29	99.96		55.57	0.31	26.87	0.81	0.15	0.31	9.82	4.65	1.31	99.8		1.02197	0.00550688	0.337387	0.0629088	0.00140964	0.0414392	0.0713267	0.143917	0.124841	0.00408632	1.81479		0.563133	0.00303444	0.185909	0.0346645	0.000776751	0.0228341	0.0393029	0.0793023	0.0687906	0.00225167
Nicotra et al. (2018)		21	1008		61.4	0.44	17.2	4.52	0.1	1.67	4	4.46	5.88	0.29	99.96		55.54	0.32	27.02	0.81	0.17	0.3	10.09	4.49	1.14	99.88		1.02197	0.00550688	0.337387	0.0629088	0.00140964	0.0414392	0.0713267	0.143917	0.124841	0.00408632	1.81479		0.563133	0.00303444	0.185909	0.0346645	0.000776751	0.0228341	0.0393029	0.0793023	0.0687906	0.00225167
Nicotra et al. (2018)		28	1008		61.4	0.44	17.2	4.52	0.1	1.67	4	4.46	5.88	0.29	99.96		55.52	0.32	26.9	0.88	0.16	0.27	9.95	4.67	1.19	99.86		1.02197	0.00550688	0.337387	0.0629088	0.00140964	0.0414392	0.0713267	0.143917	0.124841	0.00408632	1.81479		0.563133	0.00303444	0.185909	0.0346645	0.000776751	0.0228341	0.0393029	0.0793023	0.0687906	0.00225167
Nicotra et al. (2018)		35	1008		61.4	0.44	17.2	4.52	0.1	1.67	4	4.46	5.88	0.29	99.96		56.11	0.18	27.07	0.75	0.13	0.32	9.17	4.96	1.17	99.86		1.02197	0.00550688	0.337387	0.0629088	0.00140964	0.0414392	0.0713267	0.143917	0.124841	0.00408632	1.81479		0.563133	0.00303444	0.185909	0.0346645	0.000776751	0.0228341	0.0393029	0.0793023	0.0687906	0.00225167
Nicotra et al. (2018)		42	1008		61.4	0.44	17.2	4.52	0.1	1.67	4	4.46	5.88	0.29	99.96		55.35	0.25	27.46	0.79	0.22	0.26	9.6	4.77	1.23	99.93		1.02197	0.00550688	0.337387	0.0629088	0.00140964	0.0414392	0.0713267	0.143917	0.124841	0.00408632	1.81479		0.563133	0.00303444	0.185909	0.0346645	0.000776751	0.0228341	0.0393029	0.0793023	0.0687906	0.00225167
Nicotra et al. (2018)		49	1008		61.4	0.44	17.2	4.52	0.1	1.67	4	4.46	5.88	0.29	99.96		55.66	0.19	27.19	0.77	0.11	0.27	9.82	4.62	1.19	99.82		1.02197	0.00550688	0.337387	0.0629088	0.00140964	0.0414392	0.0713267	0.143917	0.124841	0.00408632	1.81479		0.563133	0.00303444	0.185909	0.0346645	0.000776751	0.0228341	0.0393029	0.0793023	0.0687906	0.00225167
Nicotra et al. (2018)		56	1008		61.4	0.44	17.2	4.52	0.1	1.67	4	4.46	5.88	0.29	99.96		56.2	0.23	27.02	0.73	0.07	0.29	9.75	4.56	1.02	99.87		1.02197	0.00550688	0.337387	0.0629088	0.00140964	0.0414392	0.0713267	0.143917	0.124841	0.00408632	1.81479		0.563133	0.00303444	0.185909	0.0346645	0.000776751	0.0228341	0.0393029	0.0793023	0.0687906	0.00225167
Nicotra et al. (2018)		63	1008		61.4	0.44	17.2	4.52	0.1	1.67	4	4.46	5.88	0.29	99.96		55.92	0.21	26.8	0.78	0.09	0.38	9.28	4.87	1.33	99.66		1.02197	0.00550688	0.337387	0.0629088	0.00140964	0.0414392	0.0713267	0.143917	0.124841	0.00408632	1.81479		0.563133	0.00303444	0.185909	0.0346645	0.000776751	0.0228341	0.0393029	0.0793023	0.0687906	0.00225167
Nicotra et al. (2018)		77	1008		61.4	0.44	17.2	4.52	0.1	1.67	4	4.46	5.88	0.29	99.96		56.38	0.11	26.75	0.84	0.17	0.2	9.26	4.89	1.16	99.76		1.02197	0.00550688	0.337387	0.0629088	0.00140964	0.0414392	0.0713267	0.143917	0.124841	0.00408632	1.81479		0.563133	0.00303444	0.185909	0.0346645	0.000776751	0.0228341	0.0393029	0.0793023	0.0687906	0.00225167
Nicotra et al. (2018)		84	1008		61.4	0.44	17.2	4.52	0.1	1.67	4	4.46	5.88	0.29	99.96		55.96	0.36	26.93	0.84	0.18	0.19	9.09	4.95	1.2	99.7		1.02197	0.00550688	0.337387	0.0629088	0.00140964	0.0414392	0.0713267	0.143917	0.124841	0.00408632	1.81479		0.563133	0.00303444	0.185909	0.0346645	0.000776751	0.0228341	0.0393029	0.0793023	0.0687906	0.00225167
Nicotra et al. (2018)		91	1008		61.4	0.44	17.2	4.52	0.1	1.67	4	4.46	5.88	0.29	99.96		56.24	0.21	27.3	0.62	0	0.23	9.01	5.13	1.25	99.99		1.02197	0.00550688	0.337387	0.0629088	0.00140964	0.0414392	0.0713267	0.143917	0.124841	0.00408632	1.81479		0.563133	0.00303444	0.185909	0.0346645	0.000776751	0.0228341	0.0393029	0.0793023	0.0687906	0.00225167
Nicotra et al. (2018)		98	1008		61.4	0.44	17.2	4.52	0.1	1.67	4	4.46	5.88	0.29	99.96		55.38	0.33	27.01	0.91	0.18	0.41	10.36	3.95	1.42	99.95		1.02197	0.00550688	0.337387	0.0629088	0.00140964	0.0414392	0.0713267	0.143917	0.124841	0.00408632	1.81479		0.563133	0.00303444	0.185909	0.0346645	0.000776751	0.0228341	0.0393029	0.0793023	0.0687906	0.00225167
Nicotra et al. (2018)		105	1008		61.4	0.44	17.2	4.52	0.1	1.67	4	4.46	5.88	0.29	99.96		56.23	0.26	27.25	0.71	0.1	0.18	8.82	5.43	1.01	99.99		1.02197	0.00550688	0.337387	0.0629088	0.00140964	0.0414392	0.0713267	0.143917	0.124841	0.00408632	1.81479		0.563133	0.00303444	0.185909	0.0346645	0.000776751	0.0228341	0.0393029	0.0793023	0.0687906	0.00225167
Nicotra et al. (2018)		112	1008		61.4	0.44	17.2	4.52	0.1	1.67	4	4.46	5.88	0.29	99.96		55.52	0.31	26.84	1.03	0.18	0.21	10.89	3.78	1.23	99.99		1.02197	0.00550688	0.337387	0.0629088	0.00140964	0.0414392	0.0713267	0.143917	0.124841	0.00408632	1.81479		0.563133	0.00303444	0.185909	0.0346645	0.000776751	0.0228341	0.0393029	0.0793023	0.0687906	0.00225167
Nicotra et al. (2018)		119	1008		61.4	0.44	17.2	4.52	0.1	1.67	4	4.46	5.88	0.29	99.96		55.89	0.2	27.37	0.66	0.16	0.19	9.09	5.07	1.03	99.66		1.02197	0.00550688	0.337387	0.0629088	0.00140964	0.0414392	0.0713267	0.143917	0.124841	0.00408632	1.81479		0.563133	0.00303444	0.185909	0.0346645	0.000776751	0.0228341	0.0393029	0.0793023	0.0687906	0.00225167
Nicotra et al. (2018)		126	1008		61.4	0.44	17.2	4.52	0.1	1.67	4	4.46	5.88	0.29	99.96		55.53	0.24	27.38	0.78	0.23	0.24	9.15	5.47	0.97	99.99		1.02197	0.00550688	0.337387	0.0629088	0.00140964	0.0414392	0.0713267	0.143917	0.124841	0.00408632	1.81479		0.563133	0.00303444	0.185909	0.0346645	0.000776751	0.0228341	0.0393029	0.0793023	0.0687906	0.00225167
Nicotra et al. (2018)		133	1008		61.4	0.44	17.2	4.52	0.1	1.67	4	4.46	5.88	0.29	99.96		55.28	0.26	27.35	0.65	0.19	0.33	9.88	4.74	1.14	99.82		1.02197	0.00550688	0.337387	0.0629088	0.00140964	0.0414392	0.0713267	0.143917	0.124841	0.00408632	1.81479		0.563133	0.00303444	0.185909	0.0346645	0.000776751	0.0228341	0.0393029	0.0793023	0.0687906	0.00225167
Nicotra et al. (2018)		140	1008		61.4	0.44	17.2	4.52	0.1	1.67	4	4.46	5.88	0.29	99.96		54.39	0.25	27.68	0.64	0.2	0.25	9.48	5.04	1.88	99.81		1.02197	0.00550688	0.337387	0.0629088	0.00140964	0.0414392	0.0713267	0.143917	0.124841	0.00408632	1.81479		0.563133	0.00303444	0.185909	0.0346645	0.000776751	0.0228341	0.0393029	0.0793023	0.0687906	0.00225167
Nicotra et al. (2018)		147	1008		61.4	0.44	17.2	4.52	0.1	1.67	4	4.46	5.88	0.29	99.96		56.36	0.28	25.27	0.96	0.22	0.5	8.06	4.4	3.57	99.62		1.02197	0.00550688	0.337387	0.0629088	0.00140964	0.0414392	0.0713267	0.143917	0.124841	0.00408632	1.81479		0.563133	0.00303444	0.185909	0.0346645	0.000776751	0.0228341	0.0393029	0.0793023	0.0687906	0.00225167
Nicotra et al. (2018)		154	1008		61.4	0.44	17.2	4.52	0.1	1.67	4	4.46	5.88	0.29	99.96		55.32	0.22	27.28	0.79	0.13	0.18	10.13	4.6	1.34	99.99		1.02197	0.00550688	0.337387	0.0629088	0.00140964	0.0414392	0.0713267	0.143917	0.124841	0.00408632	1.81479		0.563133	0.00303444	0.185909	0.0346645	0.000776751	0.0228341	0.0393029	0.0793023	0.0687906	0.00225167
Nicotra et al. (2018)		161	1008		61.4	0.44	17.2	4.52	0.1	1.67	4	4.46	5.88	0.29	99.96		53.7	0.46	26.75	1	0.14	0.43	11.51	4.34	1.25	99.58		1.02197	0.00550688	0.337387	0.0629088	0.00140964	0.0414392	0.0713267	0.143917	0.124841	0.00408632	1.81479		0.563133	0.00303444	0.185909	0.0346645	0.000776751	0.0228341	0.0393029	0.0793023	0.0687906	0.00225167
Nicotra et al. (2018)		168	1008		61.4	0.44	17.2	4.52	0.1	1.67	4	4.46	5.88	0.29	99.96		55.17	0.58	26.73	0.7	0.11	0.53	9.9	5.04	1.23	99.99		1.02197	0.00550688	0.337387	0.0629088	0.00140964	0.0414392	0.0713267	0.143917	0.124841	0.00408632	1.81479		0.563133	0.00303444	0.185909	0.0346645	0.000776751	0.0228341	0.0393029	0.0793023	0.0687906	0.00225167
Nicotra et al. (2018)		175	1008		61.4	0.44	17.2	4.52	0.1	1.67	4	4.46	5.88	0.29	99.96		56.37	0.22	26.98	0.7	0.14	0.23	8.96	4.82	1.32	99.74		1.02197	0.00550688	0.337387	0.0629088	0.00140964	0.0414392	0.0713267	0.143917	0.124841	0.00408632	1.81479		0.563133	0.00303444	0.185909	0.0346645	0.000776751	0.0228341	0.0393029	0.0793023	0.0687906	0.00225167
Nicotra et al. (2018)		182	1008		61.4	0.44	17.2	4.52	0.1	1.67	4	4.46	5.88	0.29	99.96		55.79	0.23	27.12	0.82	0.19	0.14	9.37	4.85	1.42	99.93		1.02197	0.00550688	0.337387	0.0629088	0.00140964	0.0414392	0.0713267	0.143917	0.124841	0.00408632	1.81479		0.563133	0.00303444	0.185909	0.0346645	0.000776751	0.0228341	0.0393029	0.0793023	0.0687906	0.00225167
Nicotra et al. (2018)		189	1008		61.4	0.44	17.2	4.52	0.1	1.67	4	4.46	5.88	0.29	99.96		55.39	0.31	27.08	0.72	0.18	0.36	9.97	4.6	1.3	99.91		1.02197	0.00550688	0.337387	0.0629088	0.00140964	0.0414392	0.0713267	0.143917	0.124841	0.00408632	1.81479		0.563133	0.00303444	0.185909	0.0346645	0.000776751	0.0228341	0.0393029	0.0793023	0.0687906	0.00225167
Nicotra et al. (2018)		196	1008		61.4	0.44	17.2	4.52	0.1	1.67	4	4.46	5.88	0.29	99.96		55.68	0.25	27.13	0.8	0.19	0.15	9.55	4.78	1.36	99.89		1.02197	0.00550688	0.337387	0.0629088	0.00140964	0.0414392	0.0713267	0.143917	0.124841	0.00408632	1.81479		0.563133	0.00303444	0.185909	0.0346645	0.000776751	0.0228341	0.0393029	0.0793023	0.0687906	0.00225167
Nicotra et al. (2018)		203	1008		61.4	0.44	17.2	4.52	0.1	1.67	4	4.46	5.88	0.29	99.96		55.16	0.21	27.58	0.65	0.11	0.44	9.77	4.76	1.17	99.85		1.02197	0.00550688	0.337387	0.0629088	0.00140964	0.0414392	0.0713267	0.143917	0.124841	0.00408632	1.81479		0.563133	0.00303444	0.185909	0.0346645	0.000776751	0.0228341	0.0393029	0.0793023	0.0687906	0.00225167
Nicotra et al. (2018)		210	1008		61.4	0.44	17.2	4.52	0.1	1.67	4	4.46	5.88	0.29	99.96		55.62	0.27	26.69	0.86	0.21	0.33	9.8	4.8	1.25	99.83		1.02197	0.00550688	0.337387	0.0629088	0.00140964	0.0414392	0.0713267	0.143917	0.124841	0.00408632	1.81479		0.563133	0.00303444	0.185909	0.0346645	0.000776751	0.0228341	0.0393029	0.0793023	0.0687906	0.00225167
Nicotra et al. (2018)		217	1008		61.4	0.44	17.2	4.52	0.1	1.67	4	4.46	5.88	0.29	99.96		55.73	0.16	27.67	0.69	0.12	0.31	9.66	4.74	0.94	100.02		1.02197	0.00550688	0.337387	0.0629088	0.00140964	0.0414392	0.0713267	0.143917	0.124841	0.00408632	1.81479		0.563133	0.00303444	0.185909	0.0346645	0.000776751	0.0228341	0.0393029	0.0793023	0.0687906	0.00225167
Nicotra et al. (2018)		224	1008		61.4	0.44	17.2	4.52	0.1	1.67	4	4.46	5.88	0.29	99.96		56.01	0.23	26.81	0.84	0.19	0.26	9.4	5	1.28	100.02		1.02197	0.00550688	0.337387	0.0629088	0.00140964	0.0414392	0.0713267	0.143917	0.124841	0.00408632	1.81479		0.563133	0.00303444	0.185909	0.0346645	0.000776751	0.0228341	0.0393029	0.0793023	0.0687906	0.00225167
Nicotra et al. (2018)		231	1008		61.4	0.44	17.2	4.52	0.1	1.67	4	4.46	5.88	0.29	99.96		54.84	0.18	27.98	0.85	0.27	0.28	10.35	4.24	0.93	99.92		1.02197	0.00550688	0.337387	0.0629088	0.00140964	0.0414392	0.0713267	0.143917	0.124841	0.00408632	1.81479		0.563133	0.00303444	0.185909	0.0346645	0.000776751	0.0228341	0.0393029	0.0793023	0.0687906	0.00225167
Nicotra et al. (2018)		238	1008		61.4	0.44	17.2	4.52	0.1	1.67	4	4.46	5.88	0.29	99.96		54.56	0.23	28.07	0.74	0.16	0.18	10.47	4.43	1.02	99.86		1.02197	0.00550688	0.337387	0.0629088	0.00140964	0.0414392	0.0713267	0.143917	0.124841	0.00408632	1.81479		0.563133	0.00303444	0.185909	0.0346645	0.000776751	0.0228341	0.0393029	0.0793023	0.0687906	0.00225167
Nicotra et al. (2018)		245	1008		61.4	0.44	17.2	4.52	0.1	1.67	4	4.46	5.88	0.29	99.96		55.36	0.28	27.33	0.69	0.21	0.38	10.16	4.53	1.05	99.99		1.02197	0.00550688	0.337387	0.0629088	0.00140964	0.0414392	0.0713267	0.143917	0.124841	0.00408632	1.81479		0.563133	0.00303444	0.185909	0.0346645	0.000776751	0.0228341	0.0393029	0.0793023	0.0687906	0.00225167
Nicotra et al. (2018)		252	1008		61.4	0.44	17.2	4.52	0.1	1.67	4	4.46	5.88	0.29	99.96		55.52	0.26	27.5	0.72	0.11	0.3	10	4.48	1.12	100.01		1.02197	0.00550688	0.337387	0.0629088	0.00140964	0.0414392	0.0713267	0.143917	0.124841	0.00408632	1.81479		0.563133	0.00303444	0.185909	0.0346645	0.000776751	0.0228341	0.0393029	0.0793023	0.0687906	0.00225167
Nicotra et al. (2018)		259	1008		61.4	0.44	17.2	4.52	0.1	1.67	4	4.46	5.88	0.29	99.96		54.85	0.35	27.88	0.79	0.2	0.3	10.19	4.2	1.24	100		1.02197	0.00550688	0.337387	0.0629088	0.00140964	0.0414392	0.0713267	0.143917	0.124841	0.00408632	1.81479		0.563133	0.00303444	0.185909	0.0346645	0.000776751	0.0228341	0.0393029	0.0793023	0.0687906	0.00225167
Nicotra et al. (2018)		266	1008		61.4	0.44	17.2	4.52	0.1	1.67	4	4.46	5.88	0.29	99.96		55.63	0.22	27.28	0.76	0.05	0.37	9.68	4.7	1.05	99.74		1.02197	0.00550688	0.337387	0.0629088	0.00140964	0.0414392	0.0713267	0.143917	0.124841	0.00408632	1.81479		0.563133	0.00303444	0.185909	0.0346645	0.000776751	0.0228341	0.0393029	0.0793023	0.0687906	0.00225167
Nicotra et al. (2018)		273	1008		61.4	0.44	17.2	4.52	0.1	1.67	4	4.46	5.88	0.29	99.96		55.09	0.34	27.45	0.9	0.24	0.45	9.91	4.29	1.13	99.8		1.02197	0.00550688	0.337387	0.0629088	0.00140964	0.0414392	0.0713267	0.143917	0.124841	0.00408632	1.81479		0.563133	0.00303444	0.185909	0.0346645	0.000776751	0.0228341	0.0393029	0.0793023	0.0687906	0.00225167
Nicotra et al. (2018)		280	1008		61.4	0.44	17.2	4.52	0.1	1.67	4	4.46	5.88	0.29	99.96		55.26	0.28	27.66	0.82	0.14	0.37	9.92	4.45	1.11	100.01		1.02197	0.00550688	0.337387	0.0629088	0.00140964	0.0414392	0.0713267	0.143917	0.124841	0.00408632	1.81479		0.563133	0.00303444	0.185909	0.0346645	0.000776751	0.0228341	0.0393029	0.0793023	0.0687906	0.00225167
Nicotra et al. (2018)		287	1008		61.4	0.44	17.2	4.52	0.1	1.67	4	4.46	5.88	0.29	99.96		55.44	0.18	27.27	0.87	0.23	0.33	9.9	4.67	0.94	99.83		1.02197	0.00550688	0.337387	0.0629088	0.00140964	0.0414392	0.0713267	0.143917	0.124841	0.00408632	1.81479		0.563133	0.00303444	0.185909	0.0346645	0.000776751	0.0228341	0.0393029	0.0793023	0.0687906	0.00225167
Nicotra et al. (2018)		294	1008		61.4	0.44	17.2	4.52	0.1	1.67	4	4.46	5.88	0.29	99.96		54.84	0.23	27.69	0.78	0.16	0.37	10.42	4.54	0.83	99.86		1.02197	0.00550688	0.337387	0.0629088	0.00140964	0.0414392	0.0713267	0.143917	0.124841	0.00408632	1.81479		0.563133	0.00303444	0.185909	0.0346645	0.000776751	0.0228341	0.0393029	0.0793023	0.0687906	0.00225167
Nicotra et al. (2018)		301	1008		61.4	0.44	17.2	4.52	0.1	1.67	4	4.46	5.88	0.29	99.96		55.85	0.25	27.26	0.84	0.21	0.34	9.24	4.77	1.23	99.99		1.02197	0.00550688	0.337387	0.0629088	0.00140964	0.0414392	0.0713267	0.143917	0.124841	0.00408632	1.81479		0.563133	0.00303444	0.185909	0.0346645	0.000776751	0.0228341	0.0393029	0.0793023	0.0687906	0.00225167
Nicotra et al. (2018)		308	1008		61.4	0.44	17.2	4.52	0.1	1.67	4	4.46	5.88	0.29	99.96		55.59	0.25	27.29	0.78	0.19	0.23	9.79	4.49	1.19	99.8		1.02197	0.00550688	0.337387	0.0629088	0.00140964	0.0414392	0.0713267	0.143917	0.124841	0.00408632	1.81479		0.563133	0.00303444	0.185909	0.0346645	0.000776751	0.0228341	0.0393029	0.0793023	0.0687906	0.00225167
Nicotra et al. (2018)		315	1008		61.4	0.44	17.2	4.52	0.1	1.67	4	4.46	5.88	0.29	99.96		56.64	0.26	27	0.67	0.15	0.28	8.9	4.63	1.23	99.76		1.02197	0.00550688	0.337387	0.0629088	0.00140964	0.0414392	0.0713267	0.143917	0.124841	0.00408632	1.81479		0.563133	0.00303444	0.185909	0.0346645	0.000776751	0.0228341	0.0393029	0.0793023	0.0687906	0.00225167
Nicotra et al. (2018)		322	1008		61.4	0.44	17.2	4.52	0.1	1.67	4	4.46	5.88	0.29	99.96		56.21	0.31	26.8	0.7	0.07	0.32	9.62	4.72	1.25	100		1.02197	0.00550688	0.337387	0.0629088	0.00140964	0.0414392	0.0713267	0.143917	0.124841	0.00408632	1.81479		0.563133	0.00303444	0.185909	0.0346645	0.000776751	0.0228341	0.0393029	0.0793023	0.0687906	0.00225167
Nicotra et al. (2018)		329	1008		61.4	0.44	17.2	4.52	0.1	1.67	4	4.46	5.88	0.29	99.96		55.46	0.16	27.55	0.72	0.09	0.47	9.47	4.72	1.02	99.66		1.02197	0.00550688	0.337387	0.0629088	0.00140964	0.0414392	0.0713267	0.143917	0.124841	0.00408632	1.81479		0.563133	0.00303444	0.185909	0.0346645	0.000776751	0.0228341	0.0393029	0.0793023	0.0687906	0.00225167
Nicotra et al. (2018)		336	1008		61.4	0.44	17.2	4.52	0.1	1.67	4	4.46	5.88	0.29	99.96		55.42	0.22	27.58	0.74	0.11	0.25	10.09	4.44	1.02	99.87		1.02197	0.00550688	0.337387	0.0629088	0.00140964	0.0414392	0.0713267	0.143917	0.124841	0.00408632	1.81479		0.563133	0.00303444	0.185909	0.0346645	0.000776751	0.0228341	0.0393029	0.0793023	0.0687906	0.00225167
Nicotra et al. (2018)		343	1008		61.4	0.44	17.2	4.52	0.1	1.67	4	4.46	5.88	0.29	99.96		55.97	0.19	27.18	0.71	0.12	0.21	9.46	4.88	1.08	99.8		1.02197	0.00550688	0.337387	0.0629088	0.00140964	0.0414392	0.0713267	0.143917	0.124841	0.00408632	1.81479		0.563133	0.00303444	0.185909	0.0346645	0.000776751	0.0228341	0.0393029	0.0793023	0.0687906	0.00225167
Nicotra et al. (2018)		350	1008		61.4	0.44	17.2	4.52	0.1	1.67	4	4.46	5.88	0.29	99.96		56.45	0.16	26.92	0.77	0.13	0.2	9.34	4.7	1.16	99.83		1.02197	0.00550688	0.337387	0.0629088	0.00140964	0.0414392	0.0713267	0.143917	0.124841	0.00408632	1.81479		0.563133	0.00303444	0.185909	0.0346645	0.000776751	0.0228341	0.0393029	0.0793023	0.0687906	0.00225167
Nicotra et al. (2018)		357	1008		61.4	0.44	17.2	4.52	0.1	1.67	4	4.46	5.88	0.29	99.96		55.73	0.25	27.24	0.75	0.15	0.25	9.73	4.76	1.03	99.89		1.02197	0.00550688	0.337387	0.0629088	0.00140964	0.0414392	0.0713267	0.143917	0.124841	0.00408632	1.81479		0.563133	0.00303444	0.185909	0.0346645	0.000776751	0.0228341	0.0393029	0.0793023	0.0687906	0.00225167
Nicotra et al. (2018)		364	1008		61.4	0.44	17.2	4.52	0.1	1.67	4	4.46	5.88	0.29	99.96		55.31	0.24	27.31	0.88	0.24	0.3	9.94	4.6	1.06	99.88		1.02197	0.00550688	0.337387	0.0629088	0.00140964	0.0414392	0.0713267	0.143917	0.124841	0.00408632	1.81479		0.563133	0.00303444	0.185909	0.0346645	0.000776751	0.0228341	0.0393029	0.0793023	0.0687906	0.00225167
Nicotra et al. (2018)		371	1008		61.4	0.44	17.2	4.52	0.1	1.67	4	4.46	5.88	0.29	99.96		55.93	0.18	27.35	0.88	0.21	0.31	9.6	4.47	1.07	100		1.02197	0.00550688	0.337387	0.0629088	0.00140964	0.0414392	0.0713267	0.143917	0.124841	0.00408632	1.81479		0.563133	0.00303444	0.185909	0.0346645	0.000776751	0.0228341	0.0393029	0.0793023	0.0687906	0.00225167
Nicotra et al. (2018)		378	1008		61.4	0.44	17.2	4.52	0.1	1.67	4	4.46	5.88	0.29	99.96		55.61	0.36	26.53	0.89	0.17	0.39	9.64	4.87	1.12	99.58		1.02197	0.00550688	0.337387	0.0629088	0.00140964	0.0414392	0.0713267	0.143917	0.124841	0.00408632	1.81479		0.563133	0.00303444	0.185909	0.0346645	0.000776751	0.0228341	0.0393029	0.0793023	0.0687906	0.00225167
Nicotra et al. (2018)		385	1008		61.4	0.44	17.2	4.52	0.1	1.67	4	4.46	5.88	0.29	99.96		56.41	0.26	26.94	0.68	0.06	0.42	9.11	4.51	1.25	99.64		1.02197	0.00550688	0.337387	0.0629088	0.00140964	0.0414392	0.0713267	0.143917	0.124841	0.00408632	1.81479		0.563133	0.00303444	0.185909	0.0346645	0.000776751	0.0228341	0.0393029	0.0793023	0.0687906	0.00225167
Nicotra et al. (2018)		392	1008		61.4	0.44	17.2	4.52	0.1	1.67	4	4.46	5.88	0.29	99.96		56.04	0.26	27.04	0.75	0.18	0.28	9.02	4.82	1.39	99.78		1.02197	0.00550688	0.337387	0.0629088	0.00140964	0.0414392	0.0713267	0.143917	0.124841	0.00408632	1.81479		0.563133	0.00303444	0.185909	0.0346645	0.000776751	0.0228341	0.0393029	0.0793023	0.0687906	0.00225167
Nicotra et al. (2018)		399	1008		61.4	0.44	17.2	4.52	0.1	1.67	4	4.46	5.88	0.29	99.96		55.85	0.23	27.3	0.9	0.18	0.24	9.53	4.49	1.15	99.87		1.02197	0.00550688	0.337387	0.0629088	0.00140964	0.0414392	0.0713267	0.143917	0.124841	0.00408632	1.81479		0.563133	0.00303444	0.185909	0.0346645	0.000776751	0.0228341	0.0393029	0.0793023	0.0687906	0.00225167
Nicotra et al. (2018)		406	1008		61.4	0.44	17.2	4.52	0.1	1.67	4	4.46	5.88	0.29	99.96		55.5	0.37	27.06	0.83	0.22	0.26	10.21	4.21	1.2	99.86		1.02197	0.00550688	0.337387	0.0629088	0.00140964	0.0414392	0.0713267	0.143917	0.124841	0.00408632	1.81479		0.563133	0.00303444	0.185909	0.0346645	0.000776751	0.0228341	0.0393029	0.0793023	0.0687906	0.00225167
Nicotra et al. (2018)		413	1008		61.4	0.44	17.2	4.52	0.1	1.67	4	4.46	5.88	0.29	99.96		54.47	0.4	27.48	0.99	0.1	0.29	10.95	4.04	1.11	99.83		1.02197	0.00550688	0.337387	0.0629088	0.00140964	0.0414392	0.0713267	0.143917	0.124841	0.00408632	1.81479		0.563133	0.00303444	0.185909	0.0346645	0.000776751	0.0228341	0.0393029	0.0793023	0.0687906	0.00225167
Nicotra et al. (2018)		420	1008		61.4	0.44	17.2	4.52	0.1	1.67	4	4.46	5.88	0.29	99.96		55.2	0.25	27.19	0.66	0.16	0.32	10.42	4.29	1.21	99.7		1.02197	0.00550688	0.337387	0.0629088	0.00140964	0.0414392	0.0713267	0.143917	0.124841	0.00408632	1.81479		0.563133	0.00303444	0.185909	0.0346645	0.000776751	0.0228341	0.0393029	0.0793023	0.0687906	0.00225167
Nicotra et al. (2018)		427	1008		61.4	0.44	17.2	4.52	0.1	1.67	4	4.46	5.88	0.29	99.96		55.15	0.22	27.3	0.74	0.26	0.49	9.95	4.37	1.31	99.79		1.02197	0.00550688	0.337387	0.0629088	0.00140964	0.0414392	0.0713267	0.143917	0.124841	0.00408632	1.81479		0.563133	0.00303444	0.185909	0.0346645	0.000776751	0.0228341	0.0393029	0.0793023	0.0687906	0.00225167
Nicotra et al. (2018)		441	1008		61.4	0.44	17.2	4.52	0.1	1.67	4	4.46	5.88	0.29	99.96		55.17	0.31	27.25	0.83	0.18	0.32	10.17	4.46	1.16	99.85		1.02197	0.00550688	0.337387	0.0629088	0.00140964	0.0414392	0.0713267	0.143917	0.124841	0.00408632	1.81479		0.563133	0.00303444	0.185909	0.0346645	0.000776751	0.0228341	0.0393029	0.0793023	0.0687906	0.00225167
Nicotra et al. (2018)		448	1008		61.4	0.44	17.2	4.52	0.1	1.67	4	4.46	5.88	0.29	99.96		55.3	0.21	27.63	0.72	0.1	0.39	9.21	5.12	1.08	99.76		1.02197	0.00550688	0.337387	0.0629088	0.00140964	0.0414392	0.0713267	0.143917	0.124841	0.00408632	1.81479		0.563133	0.00303444	0.185909	0.0346645	0.000776751	0.0228341	0.0393029	0.0793023	0.0687906	0.00225167
Nicotra et al. (2018)		455	1008		61.4	0.44	17.2	4.52	0.1	1.67	4	4.46	5.88	0.29	99.96		55.77	0.16	27.33	0.66	0	0.32	9.85	4.61	1.21	99.91		1.02197	0.00550688	0.337387	0.0629088	0.00140964	0.0414392	0.0713267	0.143917	0.124841	0.00408632	1.81479		0.563133	0.00303444	0.185909	0.0346645	0.000776751	0.0228341	0.0393029	0.0793023	0.0687906	0.00225167
Nicotra et al. (2018)		462	1008		61.4	0.44	17.2	4.52	0.1	1.67	4	4.46	5.88	0.29	99.96		56.34	0.22	26.92	0.74	0.15	0.31	9.11	4.86	1.34	99.99		1.02197	0.00550688	0.337387	0.0629088	0.00140964	0.0414392	0.0713267	0.143917	0.124841	0.00408632	1.81479		0.563133	0.00303444	0.185909	0.0346645	0.000776751	0.0228341	0.0393029	0.0793023	0.0687906	0.00225167
Nicotra et al. (2018)		469	1008		61.4	0.44	17.2	4.52	0.1	1.67	4	4.46	5.88	0.29	99.96		56.52	0.37	26.51	0.71	0.23	0.27	9.01	4.84	1.42	99.88		1.02197	0.00550688	0.337387	0.0629088	0.00140964	0.0414392	0.0713267	0.143917	0.124841	0.00408632	1.81479		0.563133	0.00303444	0.185909	0.0346645	0.000776751	0.0228341	0.0393029	0.0793023	0.0687906	0.00225167
Nicotra et al. (2018)		476	1008		61.4	0.44	17.2	4.52	0.1	1.67	4	4.46	5.88	0.29	99.96		56.11	0.22	26.49	0.81	0.21	0.3	9.16	5.41	1.18	99.89		1.02197	0.00550688	0.337387	0.0629088	0.00140964	0.0414392	0.0713267	0.143917	0.124841	0.00408632	1.81479		0.563133	0.00303444	0.185909	0.0346645	0.000776751	0.0228341	0.0393029	0.0793023	0.0687906	0.00225167
Nicotra et al. (2018)		483	1008		61.4	0.44	17.2	4.52	0.1	1.67	4	4.46	5.88	0.29	99.96		55.46	0.22	27.51	0.71	0.1	0.25	9.99	4.58	1.12	99.94		1.02197	0.00550688	0.337387	0.0629088	0.00140964	0.0414392	0.0713267	0.143917	0.124841	0.00408632	1.81479		0.563133	0.00303444	0.185909	0.0346645	0.000776751	0.0228341	0.0393029	0.0793023	0.0687906	0.00225167
Nicotra et al. (2018)		490	1008		61.4	0.44	17.2	4.52	0.1	1.67	4	4.46	5.88	0.29	99.96		54.35	0.25	28.07	0.85	0.16	0.42	10.52	4.2	1.01	99.83		1.02197	0.00550688	0.337387	0.0629088	0.00140964	0.0414392	0.0713267	0.143917	0.124841	0.00408632	1.81479		0.563133	0.00303444	0.185909	0.0346645	0.000776751	0.0228341	0.0393029	0.0793023	0.0687906	0.00225167
Nicotra et al. (2018)		497	1008		61.4	0.44	17.2	4.52	0.1	1.67	4	4.46	5.88	0.29	99.96		54.33	0.31	27.96	0.86	0.09	0.26	10.67	4.18	1.17	99.83		1.02197	0.00550688	0.337387	0.0629088	0.00140964	0.0414392	0.0713267	0.143917	0.124841	0.00408632	1.81479		0.563133	0.00303444	0.185909	0.0346645	0.000776751	0.0228341	0.0393029	0.0793023	0.0687906	0.00225167
Nicotra et al. (2018)		504	1008		61.4	0.44	17.2	4.52	0.1	1.67	4	4.46	5.88	0.29	99.96		56.17	0.3	26.9	0.72	0.08	0.29	9.38	4.58	1.38	99.8		1.02197	0.00550688	0.337387	0.0629088	0.00140964	0.0414392	0.0713267	0.143917	0.124841	0.00408632	1.81479		0.563133	0.00303444	0.185909	0.0346645	0.000776751	0.0228341	0.0393029	0.0793023	0.0687906	0.00225167
Nicotra et al. (2018)		511	1008		61.4	0.44	17.2	4.52	0.1	1.67	4	4.46	5.88	0.29	99.96		55.52	0.35	27.14	0.78	0	0.2	9.85	4.59	1.27	99.7		1.02197	0.00550688	0.337387	0.0629088	0.00140964	0.0414392	0.0713267	0.143917	0.124841	0.00408632	1.81479		0.563133	0.00303444	0.185909	0.0346645	0.000776751	0.0228341	0.0393029	0.0793023	0.0687906	0.00225167
Nicotra et al. (2018)		518	1008		61.4	0.44	17.2	4.52	0.1	1.67	4	4.46	5.88	0.29	99.96		53.5	0.26	27.44	1.04	0.13	0.29	11.78	4.4	0.97	99.81		1.02197	0.00550688	0.337387	0.0629088	0.00140964	0.0414392	0.0713267	0.143917	0.124841	0.00408632	1.81479		0.563133	0.00303444	0.185909	0.0346645	0.000776751	0.0228341	0.0393029	0.0793023	0.0687906	0.00225167
Nicotra et al. (2018)		525	1008		61.4	0.44	17.2	4.52	0.1	1.67	4	4.46	5.88	0.29	99.96		54.2	0.11	28.3	0.82	0.15	0.28	10.75	4.35	0.97	99.93		1.02197	0.00550688	0.337387	0.0629088	0.00140964	0.0414392	0.0713267	0.143917	0.124841	0.00408632	1.81479		0.563133	0.00303444	0.185909	0.0346645	0.000776751	0.0228341	0.0393029	0.0793023	0.0687906	0.00225167
Nicotra et al. (2018)		532	1008		61.4	0.44	17.2	4.52	0.1	1.67	4	4.46	5.88	0.29	99.96		54.91	0.24	27.9	0.71	0.11	0.24	10.42	4.29	1.08	99.9		1.02197	0.00550688	0.337387	0.0629088	0.00140964	0.0414392	0.0713267	0.143917	0.124841	0.00408632	1.81479		0.563133	0.00303444	0.185909	0.0346645	0.000776751	0.0228341	0.0393029	0.0793023	0.0687906	0.00225167
Nicotra et al. (2018)		539	1008		61.4	0.44	17.2	4.52	0.1	1.67	4	4.46	5.88	0.29	99.96		54.34	0.2	28.13	0.84	0.16	0.31	10.73	4.07	1.02	99.8		1.02197	0.00550688	0.337387	0.0629088	0.00140964	0.0414392	0.0713267	0.143917	0.124841	0.00408632	1.81479		0.563133	0.00303444	0.185909	0.0346645	0.000776751	0.0228341	0.0393029	0.0793023	0.0687906	0.00225167
Nicotra et al. (2018)		546	1008		61.4	0.44	17.2	4.52	0.1	1.67	4	4.46	5.88	0.29	99.96		55.95	0.34	27.02	0.75	0.18	0.24	9.53	4.65	1.32	99.98		1.02197	0.00550688	0.337387	0.0629088	0.00140964	0.0414392	0.0713267	0.143917	0.124841	0.00408632	1.81479		0.563133	0.00303444	0.185909	0.0346645	0.000776751	0.0228341	0.0393029	0.0793023	0.0687906	0.00225167
Nicotra et al. (2018)		553	1008		61.4	0.44	17.2	4.52	0.1	1.67	4	4.46	5.88	0.29	99.96		56.41	0.16	26.78	0.77	0.1	0.21	9.35	4.84	1.31	99.93		1.02197	0.00550688	0.337387	0.0629088	0.00140964	0.0414392	0.0713267	0.143917	0.124841	0.00408632	1.81479		0.563133	0.00303444	0.185909	0.0346645	0.000776751	0.0228341	0.0393029	0.0793023	0.0687906	0.00225167
Nicotra et al. (2018)		560	1008		61.4	0.44	17.2	4.52	0.1	1.67	4	4.46	5.88	0.29	99.96		55.46	0.21	27.12	0.82	0.16	0.41	9.96	4.53	1.21	99.88		1.02197	0.00550688	0.337387	0.0629088	0.00140964	0.0414392	0.0713267	0.143917	0.124841	0.00408632	1.81479		0.563133	0.00303444	0.185909	0.0346645	0.000776751	0.0228341	0.0393029	0.0793023	0.0687906	0.00225167
Nicotra et al. (2018)		567	1008		61.4	0.44	17.2	4.52	0.1	1.67	4	4.46	5.88	0.29	99.96		55.07	0.3	26.93	0.93	0.26	0.38	10.1	4.43	1.25	99.65		1.02197	0.00550688	0.337387	0.0629088	0.00140964	0.0414392	0.0713267	0.143917	0.124841	0.00408632	1.81479		0.563133	0.00303444	0.185909	0.0346645	0.000776751	0.0228341	0.0393029	0.0793023	0.0687906	0.00225167
Nicotra et al. (2018)		574	1008		61.4	0.44	17.2	4.52	0.1	1.67	4	4.46	5.88	0.29	99.96		55.48	0.19	27.56	0.82	0.06	0.41	9.83	4.46	1.19	100		1.02197	0.00550688	0.337387	0.0629088	0.00140964	0.0414392	0.0713267	0.143917	0.124841	0.00408632	1.81479		0.563133	0.00303444	0.185909	0.0346645	0.000776751	0.0228341	0.0393029	0.0793023	0.0687906	0.00225167
Nicotra et al. (2018)		581	1008		61.4	0.44	17.2	4.52	0.1	1.67	4	4.46	5.88	0.29	99.96		54.89	0.25	27.64	0.77	0.2	0.35	10.1	4.42	1.04	99.66		1.02197	0.00550688	0.337387	0.0629088	0.00140964	0.0414392	0.0713267	0.143917	0.124841	0.00408632	1.81479		0.563133	0.00303444	0.185909	0.0346645	0.000776751	0.0228341	0.0393029	0.0793023	0.0687906	0.00225167
Nicotra et al. (2018)		588	1008		61.4	0.44	17.2	4.52	0.1	1.67	4	4.46	5.88	0.29	99.96		55.36	0.1	27.56	0.73	0	0.4	10.24	4.28	1.16	99.83		1.02197	0.00550688	0.337387	0.0629088	0.00140964	0.0414392	0.0713267	0.143917	0.124841	0.00408632	1.81479		0.563133	0.00303444	0.185909	0.0346645	0.000776751	0.0228341	0.0393029	0.0793023	0.0687906	0.00225167
Nicotra et al. (2018)		595	1008		61.4	0.44	17.2	4.52	0.1	1.67	4	4.46	5.88	0.29	99.96		54.9	0.25	27.74	0.84	0.18	0.27	10.29	4.16	1.26	99.89		1.02197	0.00550688	0.337387	0.0629088	0.00140964	0.0414392	0.0713267	0.143917	0.124841	0.00408632	1.81479		0.563133	0.00303444	0.185909	0.0346645	0.000776751	0.0228341	0.0393029	0.0793023	0.0687906	0.00225167
Nicotra et al. (2018)		602	1008		61.4	0.44	17.2	4.52	0.1	1.67	4	4.46	5.88	0.29	99.96		54.89	0.32	27.75	0.85	0.09	0.32	10.41	4.23	1.02	99.88		1.02197	0.00550688	0.337387	0.0629088	0.00140964	0.0414392	0.0713267	0.143917	0.124841	0.00408632	1.81479		0.563133	0.00303444	0.185909	0.0346645	0.000776751	0.0228341	0.0393029	0.0793023	0.0687906	0.00225167
Nicotra et al. (2018)		609	1008		61.4	0.44	17.2	4.52	0.1	1.67	4	4.46	5.88	0.29	99.96		58.17	0.22	25.33	0.66	0.19	0.22	7.77	5.56	1.61	99.73		1.02197	0.00550688	0.337387	0.0629088	0.00140964	0.0414392	0.0713267	0.143917	0.124841	0.00408632	1.81479		0.563133	0.00303444	0.185909	0.0346645	0.000776751	0.0228341	0.0393029	0.0793023	0.0687906	0.00225167
Nicotra et al. (2018)		616	1008		61.4	0.44	17.2	4.52	0.1	1.67	4	4.46	5.88	0.29	99.96		56.79	0.12	26.46	0.69	0.13	0.23	8.83	4.96	1.38	99.59		1.02197	0.00550688	0.337387	0.0629088	0.00140964	0.0414392	0.0713267	0.143917	0.124841	0.00408632	1.81479		0.563133	0.00303444	0.185909	0.0346645	0.000776751	0.0228341	0.0393029	0.0793023	0.0687906	0.00225167
Nicotra et al. (2018)		623	1008		61.4	0.44	17.2	4.52	0.1	1.67	4	4.46	5.88	0.29	99.96		53.77	0.13	28.34	0.77	0.11	0.42	11.07	4.16	0.98	99.75		1.02197	0.00550688	0.337387	0.0629088	0.00140964	0.0414392	0.0713267	0.143917	0.124841	0.00408632	1.81479		0.563133	0.00303444	0.185909	0.0346645	0.000776751	0.0228341	0.0393029	0.0793023	0.0687906	0.00225167
Nicotra et al. (2018)		630	1008		61.4	0.44	17.2	4.52	0.1	1.67	4	4.46	5.88	0.29	99.96		53.85	0.2	28.27	0.81	0.13	0.3	10.97	4.26	0.91	99.7		1.02197	0.00550688	0.337387	0.0629088	0.00140964	0.0414392	0.0713267	0.143917	0.124841	0.00408632	1.81479		0.563133	0.00303444	0.185909	0.0346645	0.000776751	0.0228341	0.0393029	0.0793023	0.0687906	0.00225167
Nicotra et al. (2018)		637	1008		61.4	0.44	17.2	4.52	0.1	1.67	4	4.46	5.88	0.29	99.96		54.51	0.14	28.11	0.76	0.08	0.34	10.94	4.07	0.99	99.94		1.02197	0.00550688	0.337387	0.0629088	0.00140964	0.0414392	0.0713267	0.143917	0.124841	0.00408632	1.81479		0.563133	0.00303444	0.185909	0.0346645	0.000776751	0.0228341	0.0393029	0.0793023	0.0687906	0.00225167
Nicotra et al. (2018)		644	1008		61.4	0.44	17.2	4.52	0.1	1.67	4	4.46	5.88	0.29	99.96		56.36	0.18	26.87	0.83	0.26	0.34	9.01	4.48	1.41	99.74		1.02197	0.00550688	0.337387	0.0629088	0.00140964	0.0414392	0.0713267	0.143917	0.124841	0.00408632	1.81479		0.563133	0.00303444	0.185909	0.0346645	0.000776751	0.0228341	0.0393029	0.0793023	0.0687906	0.00225167
Nicotra et al. (2018)		651	1008		61.4	0.44	17.2	4.52	0.1	1.67	4	4.46	5.88	0.29	99.96		56.61	0.22	26.54	0.8	0.15	0.31	9	4.9	1.4	99.93		1.02197	0.00550688	0.337387	0.0629088	0.00140964	0.0414392	0.0713267	0.143917	0.124841	0.00408632	1.81479		0.563133	0.00303444	0.185909	0.0346645	0.000776751	0.0228341	0.0393029	0.0793023	0.0687906	0.00225167
Nicotra et al. (2018)		658	1008		61.4	0.44	17.2	4.52	0.1	1.67	4	4.46	5.88	0.29	99.96		56.05	0.19	26.76	0.7	0.18	0.35	9.35	4.96	1.21	99.75		1.02197	0.00550688	0.337387	0.0629088	0.00140964	0.0414392	0.0713267	0.143917	0.124841	0.00408632	1.81479		0.563133	0.00303444	0.185909	0.0346645	0.000776751	0.0228341	0.0393029	0.0793023	0.0687906	0.00225167
Nicotra et al. (2018)		665	1008		61.4	0.44	17.2	4.52	0.1	1.67	4	4.46	5.88	0.29	99.96		53.7	0.17	28.35	0.8	0.14	0.31	11.5	4.01	0.9	99.88		1.02197	0.00550688	0.337387	0.0629088	0.00140964	0.0414392	0.0713267	0.143917	0.124841	0.00408632	1.81479		0.563133	0.00303444	0.185909	0.0346645	0.000776751	0.0228341	0.0393029	0.0793023	0.0687906	0.00225167
Nicotra et al. (2018)		672	1008		61.4	0.44	17.2	4.52	0.1	1.67	4	4.46	5.88	0.29	99.96		54.72	0.12	28.2	0.68	0	0.23	10.71	4.39	0.89	99.94		1.02197	0.00550688	0.337387	0.0629088	0.00140964	0.0414392	0.0713267	0.143917	0.124841	0.00408632	1.81479		0.563133	0.00303444	0.185909	0.0346645	0.000776751	0.0228341	0.0393029	0.0793023	0.0687906	0.00225167
Nicotra et al. (2018)		679	1008		61.4	0.44	17.2	4.52	0.1	1.67	4	4.46	5.88	0.29	99.96		53.71	0.18	28.4	0.66	0.18	0.36	11.17	4.13	0.96	99.75		1.02197	0.00550688	0.337387	0.0629088	0.00140964	0.0414392	0.0713267	0.143917	0.124841	0.00408632	1.81479		0.563133	0.00303444	0.185909	0.0346645	0.000776751	0.0228341	0.0393029	0.0793023	0.0687906	0.00225167
Nicotra et al. (2018)		686	1008		61.4	0.44	17.2	4.52	0.1	1.67	4	4.46	5.88	0.29	99.96		54.29	0.25	27.9	0.79	0.2	0.38	10.46	4.38	1.23	99.88		1.02197	0.00550688	0.337387	0.0629088	0.00140964	0.0414392	0.0713267	0.143917	0.124841	0.00408632	1.81479		0.563133	0.00303444	0.185909	0.0346645	0.000776751	0.0228341	0.0393029	0.0793023	0.0687906	0.00225167
Nicotra et al. (2018)		693	1008		61.4	0.44	17.2	4.52	0.1	1.67	4	4.46	5.88	0.29	99.96		53.79	0.16	28.14	0.86	0.25	0.31	10.85	4.33	1.05	99.74		1.02197	0.00550688	0.337387	0.0629088	0.00140964	0.0414392	0.0713267	0.143917	0.124841	0.00408632	1.81479		0.563133	0.00303444	0.185909	0.0346645	0.000776751	0.0228341	0.0393029	0.0793023	0.0687906	0.00225167
Nicotra et al. (2018)		700	1008		61.4	0.44	17.2	4.52	0.1	1.67	4	4.46	5.88	0.29	99.96		53.94	0.25	28.04	0.94	0.18	0.3	10.71	4.31	1.1	99.77		1.02197	0.00550688	0.337387	0.0629088	0.00140964	0.0414392	0.0713267	0.143917	0.124841	0.00408632	1.81479		0.563133	0.00303444	0.185909	0.0346645	0.000776751	0.0228341	0.0393029	0.0793023	0.0687906	0.00225167
Nicotra et al. (2018)		707	1008		61.4	0.44	17.2	4.52	0.1	1.67	4	4.46	5.88	0.29	99.96		54.34	0.15	27.58	0.86	0.16	0.32	10.82	4.31	1.22	99.76		1.02197	0.00550688	0.337387	0.0629088	0.00140964	0.0414392	0.0713267	0.143917	0.124841	0.00408632	1.81479		0.563133	0.00303444	0.185909	0.0346645	0.000776751	0.0228341	0.0393029	0.0793023	0.0687906	0.00225167
Nicotra et al. (2018)		714	1008		61.4	0.44	17.2	4.52	0.1	1.67	4	4.46	5.88	0.29	99.96		54.29	0.19	27.47	0.94	0.17	0.64	10.25	4.52	1.39	99.86		1.02197	0.00550688	0.337387	0.0629088	0.00140964	0.0414392	0.0713267	0.143917	0.124841	0.00408632	1.81479		0.563133	0.00303444	0.185909	0.0346645	0.000776751	0.0228341	0.0393029	0.0793023	0.0687906	0.00225167
Nicotra et al. (2018)		721	1008		61.4	0.44	17.2	4.52	0.1	1.67	4	4.46	5.88	0.29	99.96		54.76	0.1	27.57	0.8	0.1	0.39	10.79	4.27	1.14	99.92		1.02197	0.00550688	0.337387	0.0629088	0.00140964	0.0414392	0.0713267	0.143917	0.124841	0.00408632	1.81479		0.563133	0.00303444	0.185909	0.0346645	0.000776751	0.0228341	0.0393029	0.0793023	0.0687906	0.00225167
Nicotra et al. (2018)		728	1008		61.4	0.44	17.2	4.52	0.1	1.67	4	4.46	5.88	0.29	99.96		55.68	0.24	27.16	0.86	0.09	0.09	9.89	4.56	1.28	99.85		1.02197	0.00550688	0.337387	0.0629088	0.00140964	0.0414392	0.0713267	0.143917	0.124841	0.00408632	1.81479		0.563133	0.00303444	0.185909	0.0346645	0.000776751	0.0228341	0.0393029	0.0793023	0.0687906	0.00225167
Nicotra et al. (2018)		735	1008		61.4	0.44	17.2	4.52	0.1	1.67	4	4.46	5.88	0.29	99.96		55.85	0.18	27.05	0.66	0.14	0.23	9.4	5.22	1.05	99.78		1.02197	0.00550688	0.337387	0.0629088	0.00140964	0.0414392	0.0713267	0.143917	0.124841	0.00408632	1.81479		0.563133	0.00303444	0.185909	0.0346645	0.000776751	0.0228341	0.0393029	0.0793023	0.0687906	0.00225167
Nicotra et al. (2018)		742	1008		61.4	0.44	17.2	4.52	0.1	1.67	4	4.46	5.88	0.29	99.96		54.92	0.25	27.08	0.75	0.27	0.22	10.18	4.9	1.17	99.74		1.02197	0.00550688	0.337387	0.0629088	0.00140964	0.0414392	0.0713267	0.143917	0.124841	0.00408632	1.81479		0.563133	0.00303444	0.185909	0.0346645	0.000776751	0.0228341	0.0393029	0.0793023	0.0687906	0.00225167
Nicotra et al. (2018)		749	1008		61.4	0.44	17.2	4.52	0.1	1.67	4	4.46	5.88	0.29	99.96		56.03	0.25	26.3	1	0.25	0.25	9.57	4.95	1.26	99.86		1.02197	0.00550688	0.337387	0.0629088	0.00140964	0.0414392	0.0713267	0.143917	0.124841	0.00408632	1.81479		0.563133	0.00303444	0.185909	0.0346645	0.000776751	0.0228341	0.0393029	0.0793023	0.0687906	0.00225167
Nicotra et al. (2018)		756	1008		61.4	0.44	17.2	4.52	0.1	1.67	4	4.46	5.88	0.29	99.96		57.88	0.23	25.44	0.67	0.2	0.21	8.02	5.66	1.56	99.87		1.02197	0.00550688	0.337387	0.0629088	0.00140964	0.0414392	0.0713267	0.143917	0.124841	0.00408632	1.81479		0.563133	0.00303444	0.185909	0.0346645	0.000776751	0.0228341	0.0393029	0.0793023	0.0687906	0.00225167
Palizzi Trachyte - VP2 Plag4		profile	1008
Nicotra et al. (2018)		0	1008		61.4	0.44	17.2	4.52	0.1	1.67	4	4.46	5.88	0.29	99.96		54.9	0.27	28.02	0.74	0.21	0.39	10.46	4.12	0.89	100		1.02197	0.00550688	0.337387	0.0629088	0.00140964	0.0414392	0.0713267	0.143917	0.124841	0.00408632	1.81479		0.563133	0.00303444	0.185909	0.0346645	0.000776751	0.0228341	0.0393029	0.0793023	0.0687906	0.00225167
Nicotra et al. (2018)		7	1008		61.4	0.44	17.2	4.52	0.1	1.67	4	4.46	5.88	0.29	99.96		55.25	0.25	27.65	0.84	0.17	0.31	10.48	3.98	0.95	99.88		1.02197	0.00550688	0.337387	0.0629088	0.00140964	0.0414392	0.0713267	0.143917	0.124841	0.00408632	1.81479		0.563133	0.00303444	0.185909	0.0346645	0.000776751	0.0228341	0.0393029	0.0793023	0.0687906	0.00225167
Nicotra et al. (2018)		14	1008		61.4	0.44	17.2	4.52	0.1	1.67	4	4.46	5.88	0.29	99.96		55.09	0.22	27.8	0.74	0.14	0.35	10.53	4.04	0.88	99.79		1.02197	0.00550688	0.337387	0.0629088	0.00140964	0.0414392	0.0713267	0.143917	0.124841	0.00408632	1.81479		0.563133	0.00303444	0.185909	0.0346645	0.000776751	0.0228341	0.0393029	0.0793023	0.0687906	0.00225167
Nicotra et al. (2018)		21	1008		61.4	0.44	17.2	4.52	0.1	1.67	4	4.46	5.88	0.29	99.96		55.12	0.23	28.06	0.73	0.09	0.39	10.37	4.03	0.87	99.89		1.02197	0.00550688	0.337387	0.0629088	0.00140964	0.0414392	0.0713267	0.143917	0.124841	0.00408632	1.81479		0.563133	0.00303444	0.185909	0.0346645	0.000776751	0.0228341	0.0393029	0.0793023	0.0687906	0.00225167
Nicotra et al. (2018)		28	1008		61.4	0.44	17.2	4.52	0.1	1.67	4	4.46	5.88	0.29	99.96		54.93	0.25	27.93	0.69	0.2	0.34	10.32	3.96	1.03	99.65		1.02197	0.00550688	0.337387	0.0629088	0.00140964	0.0414392	0.0713267	0.143917	0.124841	0.00408632	1.81479		0.563133	0.00303444	0.185909	0.0346645	0.000776751	0.0228341	0.0393029	0.0793023	0.0687906	0.00225167
Nicotra et al. (2018)		35	1008		61.4	0.44	17.2	4.52	0.1	1.67	4	4.46	5.88	0.29	99.96		55.43	0.24	27.65	0.85	0.12	0.22	10.12	4.22	0.96	99.81		1.02197	0.00550688	0.337387	0.0629088	0.00140964	0.0414392	0.0713267	0.143917	0.124841	0.00408632	1.81479		0.563133	0.00303444	0.185909	0.0346645	0.000776751	0.0228341	0.0393029	0.0793023	0.0687906	0.00225167
Nicotra et al. (2018)		42	1008		61.4	0.44	17.2	4.52	0.1	1.67	4	4.46	5.88	0.29	99.96		55.4	0.23	27.94	0.61	0.13	0.45	9.82	4.34	0.95	99.87		1.02197	0.00550688	0.337387	0.0629088	0.00140964	0.0414392	0.0713267	0.143917	0.124841	0.00408632	1.81479		0.563133	0.00303444	0.185909	0.0346645	0.000776751	0.0228341	0.0393029	0.0793023	0.0687906	0.00225167
Nicotra et al. (2018)		49	1008		61.4	0.44	17.2	4.52	0.1	1.67	4	4.46	5.88	0.29	99.96		54.14	0.22	28.74	0.69	0.1	0.36	11.13	3.57	0.93	99.88		1.02197	0.00550688	0.337387	0.0629088	0.00140964	0.0414392	0.0713267	0.143917	0.124841	0.00408632	1.81479		0.563133	0.00303444	0.185909	0.0346645	0.000776751	0.0228341	0.0393029	0.0793023	0.0687906	0.00225167
Nicotra et al. (2018)		56	1008		61.4	0.44	17.2	4.52	0.1	1.67	4	4.46	5.88	0.29	99.96		54.29	0.21	28.54	0.77	0.09	0.31	10.75	3.92	0.94	99.82		1.02197	0.00550688	0.337387	0.0629088	0.00140964	0.0414392	0.0713267	0.143917	0.124841	0.00408632	1.81479		0.563133	0.00303444	0.185909	0.0346645	0.000776751	0.0228341	0.0393029	0.0793023	0.0687906	0.00225167
Nicotra et al. (2018)		63	1008		61.4	0.44	17.2	4.52	0.1	1.67	4	4.46	5.88	0.29	99.96		55.05	0.21	27.82	0.98	0.24	0.38	10.39	3.69	1.01	99.77		1.02197	0.00550688	0.337387	0.0629088	0.00140964	0.0414392	0.0713267	0.143917	0.124841	0.00408632	1.81479		0.563133	0.00303444	0.185909	0.0346645	0.000776751	0.0228341	0.0393029	0.0793023	0.0687906	0.00225167
Nicotra et al. (2018)		70	1008		61.4	0.44	17.2	4.52	0.1	1.67	4	4.46	5.88	0.29	99.96		54.57	0.19	28.24	0.77	0.17	0.37	10.65	3.92	0.92	99.8		1.02197	0.00550688	0.337387	0.0629088	0.00140964	0.0414392	0.0713267	0.143917	0.124841	0.00408632	1.81479		0.563133	0.00303444	0.185909	0.0346645	0.000776751	0.0228341	0.0393029	0.0793023	0.0687906	0.00225167
Nicotra et al. (2018)		77	1008		61.4	0.44	17.2	4.52	0.1	1.67	4	4.46	5.88	0.29	99.96		54	0.28	28.63	0.73	0.11	0.2	11.3	3.8	0.8	99.85		1.02197	0.00550688	0.337387	0.0629088	0.00140964	0.0414392	0.0713267	0.143917	0.124841	0.00408632	1.81479		0.563133	0.00303444	0.185909	0.0346645	0.000776751	0.0228341	0.0393029	0.0793023	0.0687906	0.00225167
Nicotra et al. (2018)		84	1008		61.4	0.44	17.2	4.52	0.1	1.67	4	4.46	5.88	0.29	99.96		54.14	0.31	28.16	0.89	0.18	0.36	11.06	3.83	0.94	99.87		1.02197	0.00550688	0.337387	0.0629088	0.00140964	0.0414392	0.0713267	0.143917	0.124841	0.00408632	1.81479		0.563133	0.00303444	0.185909	0.0346645	0.000776751	0.0228341	0.0393029	0.0793023	0.0687906	0.00225167
Nicotra et al. (2018)		91	1008		61.4	0.44	17.2	4.52	0.1	1.67	4	4.46	5.88	0.29	99.96		54.21	0.27	28.51	0.81	0.14	0.27	10.86	3.96	0.8	99.83		1.02197	0.00550688	0.337387	0.0629088	0.00140964	0.0414392	0.0713267	0.143917	0.124841	0.00408632	1.81479		0.563133	0.00303444	0.185909	0.0346645	0.000776751	0.0228341	0.0393029	0.0793023	0.0687906	0.00225167
Nicotra et al. (2018)		98	1008		61.4	0.44	17.2	4.52	0.1	1.67	4	4.46	5.88	0.29	99.96		54.37	0.12	28.6	0.61	0	0.31	11.18	3.97	0.76	99.92		1.02197	0.00550688	0.337387	0.0629088	0.00140964	0.0414392	0.0713267	0.143917	0.124841	0.00408632	1.81479		0.563133	0.00303444	0.185909	0.0346645	0.000776751	0.0228341	0.0393029	0.0793023	0.0687906	0.00225167
Nicotra et al. (2018)		105	1008		61.4	0.44	17.2	4.52	0.1	1.67	4	4.46	5.88	0.29	99.96		55.19	0.22	27.71	0.77	0.11	0.21	10.24	4.34	0.88	99.67		1.02197	0.00550688	0.337387	0.0629088	0.00140964	0.0414392	0.0713267	0.143917	0.124841	0.00408632	1.81479		0.563133	0.00303444	0.185909	0.0346645	0.000776751	0.0228341	0.0393029	0.0793023	0.0687906	0.00225167
Nicotra et al. (2018)		112	1008		61.4	0.44	17.2	4.52	0.1	1.67	4	4.46	5.88	0.29	99.96		54.4	0.3	28.02	0.9	0.19	0.34	10.58	4.11	0.95	99.79		1.02197	0.00550688	0.337387	0.0629088	0.00140964	0.0414392	0.0713267	0.143917	0.124841	0.00408632	1.81479		0.563133	0.00303444	0.185909	0.0346645	0.000776751	0.0228341	0.0393029	0.0793023	0.0687906	0.00225167
Nicotra et al. (2018)		119	1008		61.4	0.44	17.2	4.52	0.1	1.67	4	4.46	5.88	0.29	99.96		54.69	0.19	28.22	0.81	0.09	0.3	10.57	4.06	0.94	99.87		1.02197	0.00550688	0.337387	0.0629088	0.00140964	0.0414392	0.0713267	0.143917	0.124841	0.00408632	1.81479		0.563133	0.00303444	0.185909	0.0346645	0.000776751	0.0228341	0.0393029	0.0793023	0.0687906	0.00225167
Nicotra et al. (2018)		126	1008		61.4	0.44	17.2	4.52	0.1	1.67	4	4.46	5.88	0.29	99.96		56.52	0.24	26.76	0.87	0.09	0.39	9.42	4.52	1	99.81		1.02197	0.00550688	0.337387	0.0629088	0.00140964	0.0414392	0.0713267	0.143917	0.124841	0.00408632	1.81479		0.563133	0.00303444	0.185909	0.0346645	0.000776751	0.0228341	0.0393029	0.0793023	0.0687906	0.00225167
Nicotra et al. (2018)		133	1008		61.4	0.44	17.2	4.52	0.1	1.67	4	4.46	5.88	0.29	99.96		54.02	0.27	28.58	0.76	0.23	0.25	10.89	3.94	0.75	99.69		1.02197	0.00550688	0.337387	0.0629088	0.00140964	0.0414392	0.0713267	0.143917	0.124841	0.00408632	1.81479		0.563133	0.00303444	0.185909	0.0346645	0.000776751	0.0228341	0.0393029	0.0793023	0.0687906	0.00225167
Nicotra et al. (2018)		140	1008		61.4	0.44	17.2	4.52	0.1	1.67	4	4.46	5.88	0.29	99.96		55.13	0.12	28.16	0.7	0.06	0.26	10.82	3.81	0.88	99.94		1.02197	0.00550688	0.337387	0.0629088	0.00140964	0.0414392	0.0713267	0.143917	0.124841	0.00408632	1.81479		0.563133	0.00303444	0.185909	0.0346645	0.000776751	0.0228341	0.0393029	0.0793023	0.0687906	0.00225167
Nicotra et al. (2018)		147	1008		61.4	0.44	17.2	4.52	0.1	1.67	4	4.46	5.88	0.29	99.96		54.88	0.3	27.97	0.75	0.24	0.37	10.13	4.2	0.81	99.65		1.02197	0.00550688	0.337387	0.0629088	0.00140964	0.0414392	0.0713267	0.143917	0.124841	0.00408632	1.81479		0.563133	0.00303444	0.185909	0.0346645	0.000776751	0.0228341	0.0393029	0.0793023	0.0687906	0.00225167
Nicotra et al. (2018)		154	1008		61.4	0.44	17.2	4.52	0.1	1.67	4	4.46	5.88	0.29	99.96		54.29	0.17	28.52	0.77	0.13	0.35	11.01	3.83	0.8	99.87		1.02197	0.00550688	0.337387	0.0629088	0.00140964	0.0414392	0.0713267	0.143917	0.124841	0.00408632	1.81479		0.563133	0.00303444	0.185909	0.0346645	0.000776751	0.0228341	0.0393029	0.0793023	0.0687906	0.00225167
Nicotra et al. (2018)		161	1008		61.4	0.44	17.2	4.52	0.1	1.67	4	4.46	5.88	0.29	99.96		54.87	0.24	27.71	0.8	0.21	0.32	10.32	4.42	0.92	99.81		1.02197	0.00550688	0.337387	0.0629088	0.00140964	0.0414392	0.0713267	0.143917	0.124841	0.00408632	1.81479		0.563133	0.00303444	0.185909	0.0346645	0.000776751	0.0228341	0.0393029	0.0793023	0.0687906	0.00225167
Nicotra et al. (2018)		168	1008		61.4	0.44	17.2	4.52	0.1	1.67	4	4.46	5.88	0.29	99.96		55.13	0.16	28.3	0.74	0.09	0.29	10.43	4.03	0.83	100		1.02197	0.00550688	0.337387	0.0629088	0.00140964	0.0414392	0.0713267	0.143917	0.124841	0.00408632	1.81479		0.563133	0.00303444	0.185909	0.0346645	0.000776751	0.0228341	0.0393029	0.0793023	0.0687906	0.00225167
Nicotra et al. (2018)		175	1008		61.4	0.44	17.2	4.52	0.1	1.67	4	4.46	5.88	0.29	99.96		53.52	0.19	28.97	1	0.17	0.25	11.35	3.76	0.69	99.9		1.02197	0.00550688	0.337387	0.0629088	0.00140964	0.0414392	0.0713267	0.143917	0.124841	0.00408632	1.81479		0.563133	0.00303444	0.185909	0.0346645	0.000776751	0.0228341	0.0393029	0.0793023	0.0687906	0.00225167
Nicotra et al. (2018)		182	1008		61.4	0.44	17.2	4.52	0.1	1.67	4	4.46	5.88	0.29	99.96		54.7	0.25	27.88	0.83	0.22	0.63	10.67	3.94	0.74	99.86		1.02197	0.00550688	0.337387	0.0629088	0.00140964	0.0414392	0.0713267	0.143917	0.124841	0.00408632	1.81479		0.563133	0.00303444	0.185909	0.0346645	0.000776751	0.0228341	0.0393029	0.0793023	0.0687906	0.00225167
Nicotra et al. (2018)		189	1008		61.4	0.44	17.2	4.52	0.1	1.67	4	4.46	5.88	0.29	99.96		54.74	0.18	28.13	0.84	0.07	0.44	10.67	3.92	0.82	99.81		1.02197	0.00550688	0.337387	0.0629088	0.00140964	0.0414392	0.0713267	0.143917	0.124841	0.00408632	1.81479		0.563133	0.00303444	0.185909	0.0346645	0.000776751	0.0228341	0.0393029	0.0793023	0.0687906	0.00225167
Nicotra et al. (2018)		196	1008		61.4	0.44	17.2	4.52	0.1	1.67	4	4.46	5.88	0.29	99.96		55.16	0.29	27.99	0.91	0.25	0.35	10.25	4.03	0.77	100		1.02197	0.00550688	0.337387	0.0629088	0.00140964	0.0414392	0.0713267	0.143917	0.124841	0.00408632	1.81479		0.563133	0.00303444	0.185909	0.0346645	0.000776751	0.0228341	0.0393029	0.0793023	0.0687906	0.00225167
Nicotra et al. (2018)		203	1008		61.4	0.44	17.2	4.52	0.1	1.67	4	4.46	5.88	0.29	99.96		56.88	0.15	26.72	0.93	0.17	0.37	9.55	3.75	1.46	99.98		1.02197	0.00550688	0.337387	0.0629088	0.00140964	0.0414392	0.0713267	0.143917	0.124841	0.00408632	1.81479		0.563133	0.00303444	0.185909	0.0346645	0.000776751	0.0228341	0.0393029	0.0793023	0.0687906	0.00225167
Nicotra et al. (2018)		210	1008		61.4	0.44	17.2	4.52	0.1	1.67	4	4.46	5.88	0.29	99.96		54.71	0.16	28.04	0.76	0.12	0.45	10.61	4.01	0.71	99.57		1.02197	0.00550688	0.337387	0.0629088	0.00140964	0.0414392	0.0713267	0.143917	0.124841	0.00408632	1.81479		0.563133	0.00303444	0.185909	0.0346645	0.000776751	0.0228341	0.0393029	0.0793023	0.0687906	0.00225167
Nicotra et al. (2018)		217	1008		61.4	0.44	17.2	4.52	0.1	1.67	4	4.46	5.88	0.29	99.96		55.04	0.13	28.43	0.65	0	0.27	10.61	3.96	0.74	99.83		1.02197	0.00550688	0.337387	0.0629088	0.00140964	0.0414392	0.0713267	0.143917	0.124841	0.00408632	1.81479		0.563133	0.00303444	0.185909	0.0346645	0.000776751	0.0228341	0.0393029	0.0793023	0.0687906	0.00225167
Nicotra et al. (2018)		224	1008		61.4	0.44	17.2	4.52	0.1	1.67	4	4.46	5.88	0.29	99.96		54.41	0.25	28.37	0.69	0.21	0.39	10.7	4.04	0.8	99.86		1.02197	0.00550688	0.337387	0.0629088	0.00140964	0.0414392	0.0713267	0.143917	0.124841	0.00408632	1.81479		0.563133	0.00303444	0.185909	0.0346645	0.000776751	0.0228341	0.0393029	0.0793023	0.0687906	0.00225167
Nicotra et al. (2018)		231	1008		61.4	0.44	17.2	4.52	0.1	1.67	4	4.46	5.88	0.29	99.96		54.45	0.26	28.3	0.8	0.15	0.43	10.77	3.85	0.86	99.87		1.02197	0.00550688	0.337387	0.0629088	0.00140964	0.0414392	0.0713267	0.143917	0.124841	0.00408632	1.81479		0.563133	0.00303444	0.185909	0.0346645	0.000776751	0.0228341	0.0393029	0.0793023	0.0687906	0.00225167
Nicotra et al. (2018)		238	1008		61.4	0.44	17.2	4.52	0.1	1.67	4	4.46	5.88	0.29	99.96		54.94	0.27	28.18	0.76	0.15	0.26	10.64	3.9	0.9	100		1.02197	0.00550688	0.337387	0.0629088	0.00140964	0.0414392	0.0713267	0.143917	0.124841	0.00408632	1.81479		0.563133	0.00303444	0.185909	0.0346645	0.000776751	0.0228341	0.0393029	0.0793023	0.0687906	0.00225167
Nicotra et al. (2018)		245	1008		61.4	0.44	17.2	4.52	0.1	1.67	4	4.46	5.88	0.29	99.96		54.95	0.16	27.85	0.83	0.09	0.42	10.21	4	1.12	99.63		1.02197	0.00550688	0.337387	0.0629088	0.00140964	0.0414392	0.0713267	0.143917	0.124841	0.00408632	1.81479		0.563133	0.00303444	0.185909	0.0346645	0.000776751	0.0228341	0.0393029	0.0793023	0.0687906	0.00225167
Nicotra et al. (2018)		252	1008		61.4	0.44	17.2	4.52	0.1	1.67	4	4.46	5.88	0.29	99.96		54.59	0.18	28.5	0.73	0.13	0.37	10.57	4.01	0.82	99.9		1.02197	0.00550688	0.337387	0.0629088	0.00140964	0.0414392	0.0713267	0.143917	0.124841	0.00408632	1.81479		0.563133	0.00303444	0.185909	0.0346645	0.000776751	0.0228341	0.0393029	0.0793023	0.0687906	0.00225167
Nicotra et al. (2018)		259	1008		61.4	0.44	17.2	4.52	0.1	1.67	4	4.46	5.88	0.29	99.96		55.3	0.16	27.74	0.73	0.14	0.34	10.55	3.9	0.92	99.78		1.02197	0.00550688	0.337387	0.0629088	0.00140964	0.0414392	0.0713267	0.143917	0.124841	0.00408632	1.81479		0.563133	0.00303444	0.185909	0.0346645	0.000776751	0.0228341	0.0393029	0.0793023	0.0687906	0.00225167
Nicotra et al. (2018)		266	1008		61.4	0.44	17.2	4.52	0.1	1.67	4	4.46	5.88	0.29	99.96		56.08	0.3	27.16	0.63	0.19	0.38	9.39	4.39	1.15	99.67		1.02197	0.00550688	0.337387	0.0629088	0.00140964	0.0414392	0.0713267	0.143917	0.124841	0.00408632	1.81479		0.563133	0.00303444	0.185909	0.0346645	0.000776751	0.0228341	0.0393029	0.0793023	0.0687906	0.00225167
Nicotra et al. (2018)		273	1008		61.4	0.44	17.2	4.52	0.1	1.67	4	4.46	5.88	0.29	99.96		55.64	0.27	27.61	1.04	0.05	0.32	10.05	3.94	0.97	99.89		1.02197	0.00550688	0.337387	0.0629088	0.00140964	0.0414392	0.0713267	0.143917	0.124841	0.00408632	1.81479		0.563133	0.00303444	0.185909	0.0346645	0.000776751	0.0228341	0.0393029	0.0793023	0.0687906	0.00225167
Nicotra et al. (2018)		280	1008		61.4	0.44	17.2	4.52	0.1	1.67	4	4.46	5.88	0.29	99.96		55.45	0.18	27.63	0.74	0.18	0.38	10.13	4.12	0.95	99.76		1.02197	0.00550688	0.337387	0.0629088	0.00140964	0.0414392	0.0713267	0.143917	0.124841	0.00408632	1.81479		0.563133	0.00303444	0.185909	0.0346645	0.000776751	0.0228341	0.0393029	0.0793023	0.0687906	0.00225167
Nicotra et al. (2018)		287	1008		61.4	0.44	17.2	4.52	0.1	1.67	4	4.46	5.88	0.29	99.96		55.37	0.22	27.72	0.74	0.06	0.24	10.26	4.18	0.96	99.75		1.02197	0.00550688	0.337387	0.0629088	0.00140964	0.0414392	0.0713267	0.143917	0.124841	0.00408632	1.81479		0.563133	0.00303444	0.185909	0.0346645	0.000776751	0.0228341	0.0393029	0.0793023	0.0687906	0.00225167
Nicotra et al. (2018)		301	1008		61.4	0.44	17.2	4.52	0.1	1.67	4	4.46	5.88	0.29	99.96		55.64	0.21	27.67	0.7	0.22	0.34	10.27	3.98	0.89	99.92		1.02197	0.00550688	0.337387	0.0629088	0.00140964	0.0414392	0.0713267	0.143917	0.124841	0.00408632	1.81479		0.563133	0.00303444	0.185909	0.0346645	0.000776751	0.0228341	0.0393029	0.0793023	0.0687906	0.00225167
Nicotra et al. (2018)		308	1008		61.4	0.44	17.2	4.52	0.1	1.67	4	4.46	5.88	0.29	99.96		54.78	0.28	27.68	1.17	0.24	0.38	10.46	3.87	0.94	99.8		1.02197	0.00550688	0.337387	0.0629088	0.00140964	0.0414392	0.0713267	0.143917	0.124841	0.00408632	1.81479		0.563133	0.00303444	0.185909	0.0346645	0.000776751	0.0228341	0.0393029	0.0793023	0.0687906	0.00225167
Nicotra et al. (2018)		315	1008		61.4	0.44	17.2	4.52	0.1	1.67	4	4.46	5.88	0.29	99.96		55.84	0.22	27.17	0.76	0.15	0.44	10.19	3.83	1.05	99.65		1.02197	0.00550688	0.337387	0.0629088	0.00140964	0.0414392	0.0713267	0.143917	0.124841	0.00408632	1.81479		0.563133	0.00303444	0.185909	0.0346645	0.000776751	0.0228341	0.0393029	0.0793023	0.0687906	0.00225167
Nicotra et al. (2018)		322	1008		61.4	0.44	17.2	4.52	0.1	1.67	4	4.46	5.88	0.29	99.96		56.14	0.23	27.2	0.91	0.16	0.74	9.96	3.43	1.25	100.02		1.02197	0.00550688	0.337387	0.0629088	0.00140964	0.0414392	0.0713267	0.143917	0.124841	0.00408632	1.81479		0.563133	0.00303444	0.185909	0.0346645	0.000776751	0.0228341	0.0393029	0.0793023	0.0687906	0.00225167
Nicotra et al. (2018)		336	1008		61.4	0.44	17.2	4.52	0.1	1.67	4	4.46	5.88	0.29	99.96		55	0.25	28.07	0.81	0.26	0.31	10.32	4.02	0.95	99.99		1.02197	0.00550688	0.337387	0.0629088	0.00140964	0.0414392	0.0713267	0.143917	0.124841	0.00408632	1.81479		0.563133	0.00303444	0.185909	0.0346645	0.000776751	0.0228341	0.0393029	0.0793023	0.0687906	0.00225167
Nicotra et al. (2018)		343	1008		61.4	0.44	17.2	4.52	0.1	1.67	4	4.46	5.88	0.29	99.96		54.9	0.17	27.99	0.82	0.16	0.31	10.63	3.72	1	99.7		1.02197	0.00550688	0.337387	0.0629088	0.00140964	0.0414392	0.0713267	0.143917	0.124841	0.00408632	1.81479		0.563133	0.00303444	0.185909	0.0346645	0.000776751	0.0228341	0.0393029	0.0793023	0.0687906	0.00225167
Nicotra et al. (2018)		350	1008		61.4	0.44	17.2	4.52	0.1	1.67	4	4.46	5.88	0.29	99.96		54.98	0.2	27.45	0.98	0.21	0.74	10.73	3.6	0.92	99.81		1.02197	0.00550688	0.337387	0.0629088	0.00140964	0.0414392	0.0713267	0.143917	0.124841	0.00408632	1.81479		0.563133	0.00303444	0.185909	0.0346645	0.000776751	0.0228341	0.0393029	0.0793023	0.0687906	0.00225167
Nicotra et al. (2018)		364	1008		61.4	0.44	17.2	4.52	0.1	1.67	4	4.46	5.88	0.29	99.96		54.06	0.09	28.76	0.8	0.08	0.43	11.22	3.9	0.66	100		1.02197	0.00550688	0.337387	0.0629088	0.00140964	0.0414392	0.0713267	0.143917	0.124841	0.00408632	1.81479		0.563133	0.00303444	0.185909	0.0346645	0.000776751	0.0228341	0.0393029	0.0793023	0.0687906	0.00225167
Nicotra et al. (2018)		371	1008		61.4	0.44	17.2	4.52	0.1	1.67	4	4.46	5.88	0.29	99.96		54.2	0.33	28.32	0.75	0.06	0.32	10.99	4.06	0.88	99.91		1.02197	0.00550688	0.337387	0.0629088	0.00140964	0.0414392	0.0713267	0.143917	0.124841	0.00408632	1.81479		0.563133	0.00303444	0.185909	0.0346645	0.000776751	0.0228341	0.0393029	0.0793023	0.0687906	0.00225167
Nicotra et al. (2018)		378	1008		61.4	0.44	17.2	4.52	0.1	1.67	4	4.46	5.88	0.29	99.96		54.65	0.26	28	0.75	0.17	0.39	10.64	4.06	0.88	99.8		1.02197	0.00550688	0.337387	0.0629088	0.00140964	0.0414392	0.0713267	0.143917	0.124841	0.00408632	1.81479		0.563133	0.00303444	0.185909	0.0346645	0.000776751	0.0228341	0.0393029	0.0793023	0.0687906	0.00225167
Nicotra et al. (2018)		385	1008		61.4	0.44	17.2	4.52	0.1	1.67	4	4.46	5.88	0.29	99.96		55.54	0.25	27.37	0.79	0.15	0.46	9.79	4.38	1.14	99.87		1.02197	0.00550688	0.337387	0.0629088	0.00140964	0.0414392	0.0713267	0.143917	0.124841	0.00408632	1.81479		0.563133	0.00303444	0.185909	0.0346645	0.000776751	0.0228341	0.0393029	0.0793023	0.0687906	0.00225167
Nicotra et al. (2018)		392	1008		61.4	0.44	17.2	4.52	0.1	1.67	4	4.46	5.88	0.29	99.96		54.42	0.29	28.11	0.88	0.12	0.36	10.52	4.21	0.99	99.9		1.02197	0.00550688	0.337387	0.0629088	0.00140964	0.0414392	0.0713267	0.143917	0.124841	0.00408632	1.81479		0.563133	0.00303444	0.185909	0.0346645	0.000776751	0.0228341	0.0393029	0.0793023	0.0687906	0.00225167
Nicotra et al. (2018)		399	1008		61.4	0.44	17.2	4.52	0.1	1.67	4	4.46	5.88	0.29	99.96		54.84	0.29	27.8	0.76	0.15	0.39	10.47	4.13	1.09	99.92		1.02197	0.00550688	0.337387	0.0629088	0.00140964	0.0414392	0.0713267	0.143917	0.124841	0.00408632	1.81479		0.563133	0.00303444	0.185909	0.0346645	0.000776751	0.0228341	0.0393029	0.0793023	0.0687906	0.00225167
Nicotra et al. (2018)		406	1008		61.4	0.44	17.2	4.52	0.1	1.67	4	4.46	5.88	0.29	99.96		54.5	0.3	27.98	0.77	0.26	0.43	10.32	4.24	1	99.8		1.02197	0.00550688	0.337387	0.0629088	0.00140964	0.0414392	0.0713267	0.143917	0.124841	0.00408632	1.81479		0.563133	0.00303444	0.185909	0.0346645	0.000776751	0.0228341	0.0393029	0.0793023	0.0687906	0.00225167
Nicotra et al. (2018)		413	1008		61.4	0.44	17.2	4.52	0.1	1.67	4	4.46	5.88	0.29	99.96		54.93	0.31	27.8	0.85	0.24	0.29	10.31	4.04	1.09	99.86		1.02197	0.00550688	0.337387	0.0629088	0.00140964	0.0414392	0.0713267	0.143917	0.124841	0.00408632	1.81479		0.563133	0.00303444	0.185909	0.0346645	0.000776751	0.0228341	0.0393029	0.0793023	0.0687906	0.00225167
Nicotra et al. (2018)		420	1008		61.4	0.44	17.2	4.52	0.1	1.67	4	4.46	5.88	0.29	99.96		55.15	0.23	27.63	0.82	0.08	0.38	10.23	4.28	1.14	99.94		1.02197	0.00550688	0.337387	0.0629088	0.00140964	0.0414392	0.0713267	0.143917	0.124841	0.00408632	1.81479		0.563133	0.00303444	0.185909	0.0346645	0.000776751	0.0228341	0.0393029	0.0793023	0.0687906	0.00225167
Nicotra et al. (2018)		427	1008		61.4	0.44	17.2	4.52	0.1	1.67	4	4.46	5.88	0.29	99.96		56.01	0.27	26.53	0.96	0.11	0.56	9.38	4.67	1.19	99.68		1.02197	0.00550688	0.337387	0.0629088	0.00140964	0.0414392	0.0713267	0.143917	0.124841	0.00408632	1.81479		0.563133	0.00303444	0.185909	0.0346645	0.000776751	0.0228341	0.0393029	0.0793023	0.0687906	0.00225167
Nicotra et al. (2018)		434	1008		61.4	0.44	17.2	4.52	0.1	1.67	4	4.46	5.88	0.29	99.96		51.13	2.66	27.45	1.07	0.36	0.34	12.75	3.04	1.02	99.82		1.02197	0.00550688	0.337387	0.0629088	0.00140964	0.0414392	0.0713267	0.143917	0.124841	0.00408632	1.81479		0.563133	0.00303444	0.185909	0.0346645	0.000776751	0.0228341	0.0393029	0.0793023	0.0687906	0.00225167
Nicotra et al. (2018)		441	1008		61.4	0.44	17.2	4.52	0.1	1.67	4	4.46	5.88	0.29	99.96		53.51	0.25	29.34	0.8	0.19	0.22	11.1	3.7	0.65	99.76		1.02197	0.00550688	0.337387	0.0629088	0.00140964	0.0414392	0.0713267	0.143917	0.124841	0.00408632	1.81479		0.563133	0.00303444	0.185909	0.0346645	0.000776751	0.0228341	0.0393029	0.0793023	0.0687906	0.00225167
Nicotra et al. (2018)		448	1008		61.4	0.44	17.2	4.52	0.1	1.67	4	4.46	5.88	0.29	99.96		53.88	0.35	28.46	0.86	0.2	0.37	11.12	3.82	0.81	99.87		1.02197	0.00550688	0.337387	0.0629088	0.00140964	0.0414392	0.0713267	0.143917	0.124841	0.00408632	1.81479		0.563133	0.00303444	0.185909	0.0346645	0.000776751	0.0228341	0.0393029	0.0793023	0.0687906	0.00225167
Nicotra et al. (2018)		455	1008		61.4	0.44	17.2	4.52	0.1	1.67	4	4.46	5.88	0.29	99.96		55.04	0.26	27.99	0.84	0.12	0.4	10.22	4.12	1.01	100		1.02197	0.00550688	0.337387	0.0629088	0.00140964	0.0414392	0.0713267	0.143917	0.124841	0.00408632	1.81479		0.563133	0.00303444	0.185909	0.0346645	0.000776751	0.0228341	0.0393029	0.0793023	0.0687906	0.00225167
Nicotra et al. (2018)		462	1008		61.4	0.44	17.2	4.52	0.1	1.67	4	4.46	5.88	0.29	99.96		54.57	0.31	27.81	0.85	0.13	0.38	10.9	3.97	0.95	99.87		1.02197	0.00550688	0.337387	0.0629088	0.00140964	0.0414392	0.0713267	0.143917	0.124841	0.00408632	1.81479		0.563133	0.00303444	0.185909	0.0346645	0.000776751	0.0228341	0.0393029	0.0793023	0.0687906	0.00225167
Nicotra et al. (2018)		469	1008		61.4	0.44	17.2	4.52	0.1	1.67	4	4.46	5.88	0.29	99.96		54.99	0.21	27.83	0.77	0.08	0.32	10.49	4.16	0.92	99.77		1.02197	0.00550688	0.337387	0.0629088	0.00140964	0.0414392	0.0713267	0.143917	0.124841	0.00408632	1.81479		0.563133	0.00303444	0.185909	0.0346645	0.000776751	0.0228341	0.0393029	0.0793023	0.0687906	0.00225167
Nicotra et al. (2018)		476	1008		61.4	0.44	17.2	4.52	0.1	1.67	4	4.46	5.88	0.29	99.96		54.46	0.24	28.25	0.78	0.18	0.38	10.59	4.03	0.86	99.77		1.02197	0.00550688	0.337387	0.0629088	0.00140964	0.0414392	0.0713267	0.143917	0.124841	0.00408632	1.81479		0.563133	0.00303444	0.185909	0.0346645	0.000776751	0.0228341	0.0393029	0.0793023	0.0687906	0.00225167
Nicotra et al. (2018)		483	1008		61.4	0.44	17.2	4.52	0.1	1.67	4	4.46	5.88	0.29	99.96		54.46	0.24	28.12	0.83	0.12	0.27	10.72	4.09	0.83	99.68		1.02197	0.00550688	0.337387	0.0629088	0.00140964	0.0414392	0.0713267	0.143917	0.124841	0.00408632	1.81479		0.563133	0.00303444	0.185909	0.0346645	0.000776751	0.0228341	0.0393029	0.0793023	0.0687906	0.00225167
Nicotra et al. (2018)		490	1008		61.4	0.44	17.2	4.52	0.1	1.67	4	4.46	5.88	0.29	99.96		55.39	0.22	27.83	0.69	0.15	0.28	9.79	4.65	0.88	99.88		1.02197	0.00550688	0.337387	0.0629088	0.00140964	0.0414392	0.0713267	0.143917	0.124841	0.00408632	1.81479		0.563133	0.00303444	0.185909	0.0346645	0.000776751	0.0228341	0.0393029	0.0793023	0.0687906	0.00225167
Nicotra et al. (2018)		497	1008		61.4	0.44	17.2	4.52	0.1	1.67	4	4.46	5.88	0.29	99.96		54.82	0.29	27.93	0.88	0.12	0.49	10.64	3.8	0.82	99.79		1.02197	0.00550688	0.337387	0.0629088	0.00140964	0.0414392	0.0713267	0.143917	0.124841	0.00408632	1.81479		0.563133	0.00303444	0.185909	0.0346645	0.000776751	0.0228341	0.0393029	0.0793023	0.0687906	0.00225167
Nicotra et al. (2018)		504	1008		61.4	0.44	17.2	4.52	0.1	1.67	4	4.46	5.88	0.29	99.96		54.14	0.25	28.5	0.73	0.08	0.4	11.06	3.86	0.77	99.79		1.02197	0.00550688	0.337387	0.0629088	0.00140964	0.0414392	0.0713267	0.143917	0.124841	0.00408632	1.81479		0.563133	0.00303444	0.185909	0.0346645	0.000776751	0.0228341	0.0393029	0.0793023	0.0687906	0.00225167
Nicotra et al. (2018)		511	1008		61.4	0.44	17.2	4.52	0.1	1.67	4	4.46	5.88	0.29	99.96		54.37	0.21	28.54	0.76	0.14	0.48	10.59	4.1	0.69	99.88		1.02197	0.00550688	0.337387	0.0629088	0.00140964	0.0414392	0.0713267	0.143917	0.124841	0.00408632	1.81479		0.563133	0.00303444	0.185909	0.0346645	0.000776751	0.0228341	0.0393029	0.0793023	0.0687906	0.00225167
Nicotra et al. (2018)		518	1008		61.4	0.44	17.2	4.52	0.1	1.67	4	4.46	5.88	0.29	99.96		54.16	0.19	28.21	0.86	0.17	0.45	10.95	3.99	0.84	99.82		1.02197	0.00550688	0.337387	0.0629088	0.00140964	0.0414392	0.0713267	0.143917	0.124841	0.00408632	1.81479		0.563133	0.00303444	0.185909	0.0346645	0.000776751	0.0228341	0.0393029	0.0793023	0.0687906	0.00225167
Nicotra et al. (2018)		525	1008		61.4	0.44	17.2	4.52	0.1	1.67	4	4.46	5.88	0.29	99.96		54.78	0.24	28.16	0.76	0.21	0.32	10.46	4.34	0.74	100.01		1.02197	0.00550688	0.337387	0.0629088	0.00140964	0.0414392	0.0713267	0.143917	0.124841	0.00408632	1.81479		0.563133	0.00303444	0.185909	0.0346645	0.000776751	0.0228341	0.0393029	0.0793023	0.0687906	0.00225167
Nicotra et al. (2018)		532	1008		61.4	0.44	17.2	4.52	0.1	1.67	4	4.46	5.88	0.29	99.96		52.64	0.13	29.74	0.73	0.11	0.38	12.05	3.39	0.61	99.78		1.02197	0.00550688	0.337387	0.0629088	0.00140964	0.0414392	0.0713267	0.143917	0.124841	0.00408632	1.81479		0.563133	0.00303444	0.185909	0.0346645	0.000776751	0.0228341	0.0393029	0.0793023	0.0687906	0.00225167
Nicotra et al. (2018)		539	1008		61.4	0.44	17.2	4.52	0.1	1.67	4	4.46	5.88	0.29	99.96		53.32	0.33	28.95	0.7	0.2	0.32	11.57	3.61	0.72	99.72		1.02197	0.00550688	0.337387	0.0629088	0.00140964	0.0414392	0.0713267	0.143917	0.124841	0.00408632	1.81479		0.563133	0.00303444	0.185909	0.0346645	0.000776751	0.0228341	0.0393029	0.0793023	0.0687906	0.00225167
Nicotra et al. (2018)		546	1008		61.4	0.44	17.2	4.52	0.1	1.67	4	4.46	5.88	0.29	99.96		59.02	0.32	24.69	0.77	0.26	0.13	7.14	5.5	1.87	99.7		1.02197	0.00550688	0.337387	0.0629088	0.00140964	0.0414392	0.0713267	0.143917	0.124841	0.00408632	1.81479		0.563133	0.00303444	0.185909	0.0346645	0.000776751	0.0228341	0.0393029	0.0793023	0.0687906	0.00225167
Nicotra et al. (2018)		553	1008		61.4	0.44	17.2	4.52	0.1	1.67	4	4.46	5.88	0.29	99.96		58.8	0.18	25.82	0.63	0.18	0.31	7.58	4.99	1.51	100		1.02197	0.00550688	0.337387	0.0629088	0.00140964	0.0414392	0.0713267	0.143917	0.124841	0.00408632	1.81479		0.563133	0.00303444	0.185909	0.0346645	0.000776751	0.0228341	0.0393029	0.0793023	0.0687906	0.00225167
Nicotra et al. (2018)		560	1008		61.4	0.44	17.2	4.52	0.1	1.67	4	4.46	5.88	0.29	99.96		60.36	0.29	23.74	0.74	0.15	0.38	5.95	5.12	3.08	99.81		1.02197	0.00550688	0.337387	0.0629088	0.00140964	0.0414392	0.0713267	0.143917	0.124841	0.00408632	1.81479		0.563133	0.00303444	0.185909	0.0346645	0.000776751	0.0228341	0.0393029	0.0793023	0.0687906	0.00225167
Nicotra et al. (2018)		567	1008		61.4	0.44	17.2	4.52	0.1	1.67	4	4.46	5.88	0.29	99.96		58.95	0.24	24.99	0.74	0.17	0.21	7.47	5.74	1.27	99.78		1.02197	0.00550688	0.337387	0.0629088	0.00140964	0.0414392	0.0713267	0.143917	0.124841	0.00408632	1.81479		0.563133	0.00303444	0.185909	0.0346645	0.000776751	0.0228341	0.0393029	0.0793023	0.0687906	0.00225167
Nicotra et al. (2018)		574	1008		61.4	0.44	17.2	4.52	0.1	1.67	4	4.46	5.88	0.29	99.96		52.42	0.28	29.58	0.86	0.19	0.43	12.38	3.14	0.59	99.87		1.02197	0.00550688	0.337387	0.0629088	0.00140964	0.0414392	0.0713267	0.143917	0.124841	0.00408632	1.81479		0.563133	0.00303444	0.185909	0.0346645	0.000776751	0.0228341	0.0393029	0.0793023	0.0687906	0.00225167
Nicotra et al. (2018)		581	1008		61.4	0.44	17.2	4.52	0.1	1.67	4	4.46	5.88	0.29	99.96		52.76	0.19	29.41	0.85	0.19	0.57	12.05	3.18	0.63	99.83		1.02197	0.00550688	0.337387	0.0629088	0.00140964	0.0414392	0.0713267	0.143917	0.124841	0.00408632	1.81479		0.563133	0.00303444	0.185909	0.0346645	0.000776751	0.0228341	0.0393029	0.0793023	0.0687906	0.00225167
Nicotra et al. (2018)		588	1008		61.4	0.44	17.2	4.52	0.1	1.67	4	4.46	5.88	0.29	99.96		51.52	0.33	29.4	0.89	0.25	0.13	13.53	3.47	0.4	99.92		1.02197	0.00550688	0.337387	0.0629088	0.00140964	0.0414392	0.0713267	0.143917	0.124841	0.00408632	1.81479		0.563133	0.00303444	0.185909	0.0346645	0.000776751	0.0228341	0.0393029	0.0793023	0.0687906	0.00225167
Nicotra et al. (2018)		595	1008		61.4	0.44	17.2	4.52	0.1	1.67	4	4.46	5.88	0.29	99.96		58.87	0	24.39	0.52	0	0.16	7.6	4.12	3.78	99.44		1.02197	0.00550688	0.337387	0.0629088	0.00140964	0.0414392	0.0713267	0.143917	0.124841	0.00408632	1.81479		0.563133	0.00303444	0.185909	0.0346645	0.000776751	0.0228341	0.0393029	0.0793023	0.0687906	0.00225167
Nicotra et al. (2018)		602	1008		61.4	0.44	17.2	4.52	0.1	1.67	4	4.46	5.88	0.29	99.96		52.48	0.25	29.4	0.85	0.26	0.26	12.14	3.33	0.68	99.65		1.02197	0.00550688	0.337387	0.0629088	0.00140964	0.0414392	0.0713267	0.143917	0.124841	0.00408632	1.81479		0.563133	0.00303444	0.185909	0.0346645	0.000776751	0.0228341	0.0393029	0.0793023	0.0687906	0.00225167
Nicotra et al. (2018)		609	1008		61.4	0.44	17.2	4.52	0.1	1.67	4	4.46	5.88	0.29	99.96		51.93	0.18	30.18	0.79	0.07	0.31	12.73	3.02	0.56	99.77		1.02197	0.00550688	0.337387	0.0629088	0.00140964	0.0414392	0.0713267	0.143917	0.124841	0.00408632	1.81479		0.563133	0.00303444	0.185909	0.0346645	0.000776751	0.0228341	0.0393029	0.0793023	0.0687906	0.00225167
Nicotra et al. (2018)		616	1008		61.4	0.44	17.2	4.52	0.1	1.67	4	4.46	5.88	0.29	99.96		53.35	0.21	28.93	0.87	0.2	0.32	11.54	3.62	0.8	99.84		1.02197	0.00550688	0.337387	0.0629088	0.00140964	0.0414392	0.0713267	0.143917	0.124841	0.00408632	1.81479		0.563133	0.00303444	0.185909	0.0346645	0.000776751	0.0228341	0.0393029	0.0793023	0.0687906	0.00225167
Nicotra et al. (2018)		623	1008		61.4	0.44	17.2	4.52	0.1	1.67	4	4.46	5.88	0.29	99.96		54.29	0.29	28.37	0.92	0.19	0.29	10.94	3.68	0.9	99.87		1.02197	0.00550688	0.337387	0.0629088	0.00140964	0.0414392	0.0713267	0.143917	0.124841	0.00408632	1.81479		0.563133	0.00303444	0.185909	0.0346645	0.000776751	0.0228341	0.0393029	0.0793023	0.0687906	0.00225167
Nicotra et al. (2018)		630	1008		61.4	0.44	17.2	4.52	0.1	1.67	4	4.46	5.88	0.29	99.96		54.74	0.17	28.25	0.78	0.18	0.33	10.7	3.79	0.88	99.82		1.02197	0.00550688	0.337387	0.0629088	0.00140964	0.0414392	0.0713267	0.143917	0.124841	0.00408632	1.81479		0.563133	0.00303444	0.185909	0.0346645	0.000776751	0.0228341	0.0393029	0.0793023	0.0687906	0.00225167
Nicotra et al. (2018)		637	1008		61.4	0.44	17.2	4.52	0.1	1.67	4	4.46	5.88	0.29	99.96		55.02	0.32	28.01	0.67	0.16	0.35	9.79	4.56	0.8	99.68		1.02197	0.00550688	0.337387	0.0629088	0.00140964	0.0414392	0.0713267	0.143917	0.124841	0.00408632	1.81479		0.563133	0.00303444	0.185909	0.0346645	0.000776751	0.0228341	0.0393029	0.0793023	0.0687906	0.00225167
Nicotra et al. (2018)		644	1008		61.4	0.44	17.2	4.52	0.1	1.67	4	4.46	5.88	0.29	99.96		53.96	0.44	27.64	0.93	0.21	0.06	11.82	3.84	0.97	99.87		1.02197	0.00550688	0.337387	0.0629088	0.00140964	0.0414392	0.0713267	0.143917	0.124841	0.00408632	1.81479		0.563133	0.00303444	0.185909	0.0346645	0.000776751	0.0228341	0.0393029	0.0793023	0.0687906	0.00225167
Nicotra et al. (2018)		651	1008		61.4	0.44	17.2	4.52	0.1	1.67	4	4.46	5.88	0.29	99.96		55.24	0.3	27.49	0.99	0.21	0.3	10.3	4.14	0.98	99.95		1.02197	0.00550688	0.337387	0.0629088	0.00140964	0.0414392	0.0713267	0.143917	0.124841	0.00408632	1.81479		0.563133	0.00303444	0.185909	0.0346645	0.000776751	0.0228341	0.0393029	0.0793023	0.0687906	0.00225167
Nicotra et al. (2018)		658	1008		61.4	0.44	17.2	4.52	0.1	1.67	4	4.46	5.88	0.29	99.96		55.01	0.39	27.71	0.84	0.15	0.33	10.05	4.46	0.94	99.88		1.02197	0.00550688	0.337387	0.0629088	0.00140964	0.0414392	0.0713267	0.143917	0.124841	0.00408632	1.81479		0.563133	0.00303444	0.185909	0.0346645	0.000776751	0.0228341	0.0393029	0.0793023	0.0687906	0.00225167
Nicotra et al. (2018)		665	1008		61.4	0.44	17.2	4.52	0.1	1.67	4	4.46	5.88	0.29	99.96		53.77	0.29	27.58	0.93	0.15	0.28	12.46	3.4	0.99	99.85		1.02197	0.00550688	0.337387	0.0629088	0.00140964	0.0414392	0.0713267	0.143917	0.124841	0.00408632	1.81479		0.563133	0.00303444	0.185909	0.0346645	0.000776751	0.0228341	0.0393029	0.0793023	0.0687906	0.00225167
Nicotra et al. (2018)		672	1008		61.4	0.44	17.2	4.52	0.1	1.67	4	4.46	5.88	0.29	99.96		52.47	0.32	25.81	1.45	0.41	0.25	14.8	3.03	1.32	99.86		1.02197	0.00550688	0.337387	0.0629088	0.00140964	0.0414392	0.0713267	0.143917	0.124841	0.00408632	1.81479		0.563133	0.00303444	0.185909	0.0346645	0.000776751	0.0228341	0.0393029	0.0793023	0.0687906	0.00225167
Palizzi Trachyte - PA Plag1		profile	1008
Nicotra et al. (2018)		0	1008		60.7	0.48	17	4.97	0.12	1.1	5.25	4.12	5.87	0.33	99.94		54.47	0.27	27.99	0.86	0.13	0.26	10.95	3.96	1.11	100		1.01032	0.00600751	0.333464	0.0691719	0.00169157	0.0272953	0.0936163	0.132946	0.124628	0.00464995	1.80379		0.560109	0.00333049	0.184869	0.0383481	0.000937786	0.0151322	0.0518997	0.0737037	0.0690925	0.00257788
Nicotra et al. (2018)		8	1008		60.7	0.48	17	4.97	0.12	1.1	5.25	4.12	5.87	0.33	99.94		54.54	0.29	27.67	0.85	0.17	0.41	10.85	3.85	1.37	100		1.01032	0.00600751	0.333464	0.0691719	0.00169157	0.0272953	0.0936163	0.132946	0.124628	0.00464995	1.80379		0.560109	0.00333049	0.184869	0.0383481	0.000937786	0.0151322	0.0518997	0.0737037	0.0690925	0.00257788
Nicotra et al. (2018)		16	1008		60.7	0.48	17	4.97	0.12	1.1	5.25	4.12	5.87	0.33	99.94		54.49	0.2	28.33	0.64	0.17	0.23	10.96	3.88	1.1	100		1.01032	0.00600751	0.333464	0.0691719	0.00169157	0.0272953	0.0936163	0.132946	0.124628	0.00464995	1.80379		0.560109	0.00333049	0.184869	0.0383481	0.000937786	0.0151322	0.0518997	0.0737037	0.0690925	0.00257788
Nicotra et al. (2018)		24	1008		60.7	0.48	17	4.97	0.12	1.1	5.25	4.12	5.87	0.33	99.94		54.14	0.29	28.33	0.82	0.21	0.27	11.14	3.77	1.04	100.01		1.01032	0.00600751	0.333464	0.0691719	0.00169157	0.0272953	0.0936163	0.132946	0.124628	0.00464995	1.80379		0.560109	0.00333049	0.184869	0.0383481	0.000937786	0.0151322	0.0518997	0.0737037	0.0690925	0.00257788
Nicotra et al. (2018)		32	1008		60.7	0.48	17	4.97	0.12	1.1	5.25	4.12	5.87	0.33	99.94		54.57	0.1	28.04	0.83	0	0.36	11.12	3.86	1.11	99.99		1.01032	0.00600751	0.333464	0.0691719	0.00169157	0.0272953	0.0936163	0.132946	0.124628	0.00464995	1.80379		0.560109	0.00333049	0.184869	0.0383481	0.000937786	0.0151322	0.0518997	0.0737037	0.0690925	0.00257788
Nicotra et al. (2018)		40	1008		60.7	0.48	17	4.97	0.12	1.1	5.25	4.12	5.87	0.33	99.94		54.21	0.22	28.52	0.78	0.16	0.14	11.23	3.68	1.06	100		1.01032	0.00600751	0.333464	0.0691719	0.00169157	0.0272953	0.0936163	0.132946	0.124628	0.00464995	1.80379		0.560109	0.00333049	0.184869	0.0383481	0.000937786	0.0151322	0.0518997	0.0737037	0.0690925	0.00257788
Nicotra et al. (2018)		48	1008		60.7	0.48	17	4.97	0.12	1.1	5.25	4.12	5.87	0.33	99.94		53.87	0.32	28.44	0.77	0.1	0.33	11.17	3.88	1.11	99.99		1.01032	0.00600751	0.333464	0.0691719	0.00169157	0.0272953	0.0936163	0.132946	0.124628	0.00464995	1.80379		0.560109	0.00333049	0.184869	0.0383481	0.000937786	0.0151322	0.0518997	0.0737037	0.0690925	0.00257788
Nicotra et al. (2018)		56	1008		60.7	0.48	17	4.97	0.12	1.1	5.25	4.12	5.87	0.33	99.94		54.24	0.29	28.19	0.81	0.2	0.25	10.83	3.99	1.19	99.99		1.01032	0.00600751	0.333464	0.0691719	0.00169157	0.0272953	0.0936163	0.132946	0.124628	0.00464995	1.80379		0.560109	0.00333049	0.184869	0.0383481	0.000937786	0.0151322	0.0518997	0.0737037	0.0690925	0.00257788
Nicotra et al. (2018)		64	1008		60.7	0.48	17	4.97	0.12	1.1	5.25	4.12	5.87	0.33	99.94		55.98	0.18	27.33	0.61	0.11	0.29	9.8	4.3	1.4	100		1.01032	0.00600751	0.333464	0.0691719	0.00169157	0.0272953	0.0936163	0.132946	0.124628	0.00464995	1.80379		0.560109	0.00333049	0.184869	0.0383481	0.000937786	0.0151322	0.0518997	0.0737037	0.0690925	0.00257788
Nicotra et al. (2018)		72	1008		60.7	0.48	17	4.97	0.12	1.1	5.25	4.12	5.87	0.33	99.94		54.66	0.38	27.94	0.92	0.13	0.22	10.58	3.95	1.2	99.98		1.01032	0.00600751	0.333464	0.0691719	0.00169157	0.0272953	0.0936163	0.132946	0.124628	0.00464995	1.80379		0.560109	0.00333049	0.184869	0.0383481	0.000937786	0.0151322	0.0518997	0.0737037	0.0690925	0.00257788
Nicotra et al. (2018)		80	1008		60.7	0.48	17	4.97	0.12	1.1	5.25	4.12	5.87	0.33	99.94		53.56	0.22	28.57	0.89	0.14	0.4	11.1	3.96	1.16	100		1.01032	0.00600751	0.333464	0.0691719	0.00169157	0.0272953	0.0936163	0.132946	0.124628	0.00464995	1.80379		0.560109	0.00333049	0.184869	0.0383481	0.000937786	0.0151322	0.0518997	0.0737037	0.0690925	0.00257788
Nicotra et al. (2018)		88	1008		60.7	0.48	17	4.97	0.12	1.1	5.25	4.12	5.87	0.33	99.94		54.11	0.21	28.65	0.79	0.05	0.15	11.27	3.72	1.04	99.99		1.01032	0.00600751	0.333464	0.0691719	0.00169157	0.0272953	0.0936163	0.132946	0.124628	0.00464995	1.80379		0.560109	0.00333049	0.184869	0.0383481	0.000937786	0.0151322	0.0518997	0.0737037	0.0690925	0.00257788
Nicotra et al. (2018)		96	1008		60.7	0.48	17	4.97	0.12	1.1	5.25	4.12	5.87	0.33	99.94		54.13	0.19	28.45	0.84	0.26	0.28	11.09	3.8	0.95	99.99		1.01032	0.00600751	0.333464	0.0691719	0.00169157	0.0272953	0.0936163	0.132946	0.124628	0.00464995	1.80379		0.560109	0.00333049	0.184869	0.0383481	0.000937786	0.0151322	0.0518997	0.0737037	0.0690925	0.00257788
Nicotra et al. (2018)		104	1008		60.7	0.48	17	4.97	0.12	1.1	5.25	4.12	5.87	0.33	99.94		54.94	0.31	27.81	0.85	0.17	0.2	10.58	3.98	1.16	100		1.01032	0.00600751	0.333464	0.0691719	0.00169157	0.0272953	0.0936163	0.132946	0.124628	0.00464995	1.80379		0.560109	0.00333049	0.184869	0.0383481	0.000937786	0.0151322	0.0518997	0.0737037	0.0690925	0.00257788
Nicotra et al. (2018)		112	1008		60.7	0.48	17	4.97	0.12	1.1	5.25	4.12	5.87	0.33	99.94		54.88	0.38	27.59	0.84	0.16	0.32	10.37	4.2	1.26	100		1.01032	0.00600751	0.333464	0.0691719	0.00169157	0.0272953	0.0936163	0.132946	0.124628	0.00464995	1.80379		0.560109	0.00333049	0.184869	0.0383481	0.000937786	0.0151322	0.0518997	0.0737037	0.0690925	0.00257788
Nicotra et al. (2018)		120	1008		60.7	0.48	17	4.97	0.12	1.1	5.25	4.12	5.87	0.33	99.94		54.77	0.4	27.63	0.83	0.26	0.24	10.2	4.32	1.33	99.98		1.01032	0.00600751	0.333464	0.0691719	0.00169157	0.0272953	0.0936163	0.132946	0.124628	0.00464995	1.80379		0.560109	0.00333049	0.184869	0.0383481	0.000937786	0.0151322	0.0518997	0.0737037	0.0690925	0.00257788
Nicotra et al. (2018)		128	1008		60.7	0.48	17	4.97	0.12	1.1	5.25	4.12	5.87	0.33	99.94		55.11	0.27	27.81	0.83	0.17	0.14	9.98	4.38	1.31	100		1.01032	0.00600751	0.333464	0.0691719	0.00169157	0.0272953	0.0936163	0.132946	0.124628	0.00464995	1.80379		0.560109	0.00333049	0.184869	0.0383481	0.000937786	0.0151322	0.0518997	0.0737037	0.0690925	0.00257788
Nicotra et al. (2018)		136	1008		60.7	0.48	17	4.97	0.12	1.1	5.25	4.12	5.87	0.33	99.94		55.38	0.21	27.67	0.78	0.16	0.28	9.9	4.22	1.41	100.01		1.01032	0.00600751	0.333464	0.0691719	0.00169157	0.0272953	0.0936163	0.132946	0.124628	0.00464995	1.80379		0.560109	0.00333049	0.184869	0.0383481	0.000937786	0.0151322	0.0518997	0.0737037	0.0690925	0.00257788
Nicotra et al. (2018)		144	1008		60.7	0.48	17	4.97	0.12	1.1	5.25	4.12	5.87	0.33	99.94		55.2	0.33	27.72	0.84	0.14	0.28	10.02	4.06	1.42	100.01		1.01032	0.00600751	0.333464	0.0691719	0.00169157	0.0272953	0.0936163	0.132946	0.124628	0.00464995	1.80379		0.560109	0.00333049	0.184869	0.0383481	0.000937786	0.0151322	0.0518997	0.0737037	0.0690925	0.00257788
Nicotra et al. (2018)		152	1008		60.7	0.48	17	4.97	0.12	1.1	5.25	4.12	5.87	0.33	99.94		54.9	0.19	27.83	0.98	0.23	0.27	10.16	4.23	1.22	100.01		1.01032	0.00600751	0.333464	0.0691719	0.00169157	0.0272953	0.0936163	0.132946	0.124628	0.00464995	1.80379		0.560109	0.00333049	0.184869	0.0383481	0.000937786	0.0151322	0.0518997	0.0737037	0.0690925	0.00257788
Nicotra et al. (2018)		160	1008		60.7	0.48	17	4.97	0.12	1.1	5.25	4.12	5.87	0.33	99.94		54.37	0.28	28.18	0.81	0.14	0.23	11.07	3.8	1.1	99.98		1.01032	0.00600751	0.333464	0.0691719	0.00169157	0.0272953	0.0936163	0.132946	0.124628	0.00464995	1.80379		0.560109	0.00333049	0.184869	0.0383481	0.000937786	0.0151322	0.0518997	0.0737037	0.0690925	0.00257788
Nicotra et al. (2018)		168	1008		60.7	0.48	17	4.97	0.12	1.1	5.25	4.12	5.87	0.33	99.94		54.74	0.28	27.55	0.85	0.2	0.35	10.68	4.06	1.28	99.99		1.01032	0.00600751	0.333464	0.0691719	0.00169157	0.0272953	0.0936163	0.132946	0.124628	0.00464995	1.80379		0.560109	0.00333049	0.184869	0.0383481	0.000937786	0.0151322	0.0518997	0.0737037	0.0690925	0.00257788
Nicotra et al. (2018)		176	1008		60.7	0.48	17	4.97	0.12	1.1	5.25	4.12	5.87	0.33	99.94		54.89	0.25	27.92	0.81	0.15	0.18	10.54	3.99	1.27	100		1.01032	0.00600751	0.333464	0.0691719	0.00169157	0.0272953	0.0936163	0.132946	0.124628	0.00464995	1.80379		0.560109	0.00333049	0.184869	0.0383481	0.000937786	0.0151322	0.0518997	0.0737037	0.0690925	0.00257788
Nicotra et al. (2018)		184	1008		60.7	0.48	17	4.97	0.12	1.1	5.25	4.12	5.87	0.33	99.94		54.59	0.28	27.97	0.71	0.15	0.23	10.92	3.98	1.18	100.01		1.01032	0.00600751	0.333464	0.0691719	0.00169157	0.0272953	0.0936163	0.132946	0.124628	0.00464995	1.80379		0.560109	0.00333049	0.184869	0.0383481	0.000937786	0.0151322	0.0518997	0.0737037	0.0690925	0.00257788
Nicotra et al. (2018)		192	1008		60.7	0.48	17	4.97	0.12	1.1	5.25	4.12	5.87	0.33	99.94		54.39	0.21	28.33	0.8	0.17	0.23	10.89	3.83	1.16	100.01		1.01032	0.00600751	0.333464	0.0691719	0.00169157	0.0272953	0.0936163	0.132946	0.124628	0.00464995	1.80379		0.560109	0.00333049	0.184869	0.0383481	0.000937786	0.0151322	0.0518997	0.0737037	0.0690925	0.00257788
Nicotra et al. (2018)		200	1008		60.7	0.48	17	4.97	0.12	1.1	5.25	4.12	5.87	0.33	99.94		54.86	0.36	27.67	0.95	0.21	0.23	10.45	3.97	1.29	99.99		1.01032	0.00600751	0.333464	0.0691719	0.00169157	0.0272953	0.0936163	0.132946	0.124628	0.00464995	1.80379		0.560109	0.00333049	0.184869	0.0383481	0.000937786	0.0151322	0.0518997	0.0737037	0.0690925	0.00257788
Nicotra et al. (2018)		208	1008		60.7	0.48	17	4.97	0.12	1.1	5.25	4.12	5.87	0.33	99.94		54.48	0.21	28.04	0.79	0.19	0.36	10.99	3.82	1.13	100.01		1.01032	0.00600751	0.333464	0.0691719	0.00169157	0.0272953	0.0936163	0.132946	0.124628	0.00464995	1.80379		0.560109	0.00333049	0.184869	0.0383481	0.000937786	0.0151322	0.0518997	0.0737037	0.0690925	0.00257788
Nicotra et al. (2018)		216	1008		60.7	0.48	17	4.97	0.12	1.1	5.25	4.12	5.87	0.33	99.94		54.45	0.21	28.29	0.77	0.08	0.26	10.92	3.86	1.16	100		1.01032	0.00600751	0.333464	0.0691719	0.00169157	0.0272953	0.0936163	0.132946	0.124628	0.00464995	1.80379		0.560109	0.00333049	0.184869	0.0383481	0.000937786	0.0151322	0.0518997	0.0737037	0.0690925	0.00257788
Nicotra et al. (2018)		224	1008		60.7	0.48	17	4.97	0.12	1.1	5.25	4.12	5.87	0.33	99.94		55.08	0.22	27.97	0.75	0.22	0.25	10.23	4.12	1.17	100.01		1.01032	0.00600751	0.333464	0.0691719	0.00169157	0.0272953	0.0936163	0.132946	0.124628	0.00464995	1.80379		0.560109	0.00333049	0.184869	0.0383481	0.000937786	0.0151322	0.0518997	0.0737037	0.0690925	0.00257788
Nicotra et al. (2018)		232	1008		60.7	0.48	17	4.97	0.12	1.1	5.25	4.12	5.87	0.33	99.94		55.28	0.24	27.85	0.76	0.1	0.22	10.27	3.98	1.3	100		1.01032	0.00600751	0.333464	0.0691719	0.00169157	0.0272953	0.0936163	0.132946	0.124628	0.00464995	1.80379		0.560109	0.00333049	0.184869	0.0383481	0.000937786	0.0151322	0.0518997	0.0737037	0.0690925	0.00257788
Nicotra et al. (2018)		240	1008		60.7	0.48	17	4.97	0.12	1.1	5.25	4.12	5.87	0.33	99.94		54.81	0.32	27.64	0.85	0.26	0.37	10.42	4.09	1.26	100.02		1.01032	0.00600751	0.333464	0.0691719	0.00169157	0.0272953	0.0936163	0.132946	0.124628	0.00464995	1.80379		0.560109	0.00333049	0.184869	0.0383481	0.000937786	0.0151322	0.0518997	0.0737037	0.0690925	0.00257788
Nicotra et al. (2018)		248	1008		60.7	0.48	17	4.97	0.12	1.1	5.25	4.12	5.87	0.33	99.94		55.73	0.26	27.56	0.73	0.21	0.19	9.84	4.15	1.34	100.01		1.01032	0.00600751	0.333464	0.0691719	0.00169157	0.0272953	0.0936163	0.132946	0.124628	0.00464995	1.80379		0.560109	0.00333049	0.184869	0.0383481	0.000937786	0.0151322	0.0518997	0.0737037	0.0690925	0.00257788
Nicotra et al. (2018)		256	1008		60.7	0.48	17	4.97	0.12	1.1	5.25	4.12	5.87	0.33	99.94		55.5	0.39	27.32	0.85	0.24	0.24	9.99	4.17	1.31	100.01		1.01032	0.00600751	0.333464	0.0691719	0.00169157	0.0272953	0.0936163	0.132946	0.124628	0.00464995	1.80379		0.560109	0.00333049	0.184869	0.0383481	0.000937786	0.0151322	0.0518997	0.0737037	0.0690925	0.00257788
Nicotra et al. (2018)		264	1008		60.7	0.48	17	4.97	0.12	1.1	5.25	4.12	5.87	0.33	99.94		55.35	0.14	27.54	0.92	0.05	0.34	10.26	4.16	1.23	99.99		1.01032	0.00600751	0.333464	0.0691719	0.00169157	0.0272953	0.0936163	0.132946	0.124628	0.00464995	1.80379		0.560109	0.00333049	0.184869	0.0383481	0.000937786	0.0151322	0.0518997	0.0737037	0.0690925	0.00257788
Nicotra et al. (2018)		272	1008		60.7	0.48	17	4.97	0.12	1.1	5.25	4.12	5.87	0.33	99.94		54.68	0.3	27.83	0.83	0.22	0.27	10.88	3.92	1.05	99.98		1.01032	0.00600751	0.333464	0.0691719	0.00169157	0.0272953	0.0936163	0.132946	0.124628	0.00464995	1.80379		0.560109	0.00333049	0.184869	0.0383481	0.000937786	0.0151322	0.0518997	0.0737037	0.0690925	0.00257788
Nicotra et al. (2018)		280	1008		60.7	0.48	17	4.97	0.12	1.1	5.25	4.12	5.87	0.33	99.94		53.38	0.24	28.53	0.77	0.11	0.51	11.73	3.66	1.06	99.99		1.01032	0.00600751	0.333464	0.0691719	0.00169157	0.0272953	0.0936163	0.132946	0.124628	0.00464995	1.80379		0.560109	0.00333049	0.184869	0.0383481	0.000937786	0.0151322	0.0518997	0.0737037	0.0690925	0.00257788
Nicotra et al. (2018)		288	1008		60.7	0.48	17	4.97	0.12	1.1	5.25	4.12	5.87	0.33	99.94		54.25	0.18	28.57	0.75	0.2	0.36	10.81	3.86	1.02	100		1.01032	0.00600751	0.333464	0.0691719	0.00169157	0.0272953	0.0936163	0.132946	0.124628	0.00464995	1.80379		0.560109	0.00333049	0.184869	0.0383481	0.000937786	0.0151322	0.0518997	0.0737037	0.0690925	0.00257788
Nicotra et al. (2018)		296	1008		60.7	0.48	17	4.97	0.12	1.1	5.25	4.12	5.87	0.33	99.94		53.43	0.17	28.45	0.73	0.09	0.61	11.45	4.02	1.06	100.01		1.01032	0.00600751	0.333464	0.0691719	0.00169157	0.0272953	0.0936163	0.132946	0.124628	0.00464995	1.80379		0.560109	0.00333049	0.184869	0.0383481	0.000937786	0.0151322	0.0518997	0.0737037	0.0690925	0.00257788
Nicotra et al. (2018)		304	1008		60.7	0.48	17	4.97	0.12	1.1	5.25	4.12	5.87	0.33	99.94		54.08	0.2	28.55	0.8	0.07	0.38	11.18	3.79	0.95	100		1.01032	0.00600751	0.333464	0.0691719	0.00169157	0.0272953	0.0936163	0.132946	0.124628	0.00464995	1.80379		0.560109	0.00333049	0.184869	0.0383481	0.000937786	0.0151322	0.0518997	0.0737037	0.0690925	0.00257788
Nicotra et al. (2018)		320	1008		60.7	0.48	17	4.97	0.12	1.1	5.25	4.12	5.87	0.33	99.94		53.9	0.07	28.31	0.75	0.14	0.39	11.88	3.56	0.99	99.99		1.01032	0.00600751	0.333464	0.0691719	0.00169157	0.0272953	0.0936163	0.132946	0.124628	0.00464995	1.80379		0.560109	0.00333049	0.184869	0.0383481	0.000937786	0.0151322	0.0518997	0.0737037	0.0690925	0.00257788
Nicotra et al. (2018)		328	1008		60.7	0.48	17	4.97	0.12	1.1	5.25	4.12	5.87	0.33	99.94		54.37	0.18	28.17	0.86	0.15	0.28	10.91	4.02	1.06	100		1.01032	0.00600751	0.333464	0.0691719	0.00169157	0.0272953	0.0936163	0.132946	0.124628	0.00464995	1.80379		0.560109	0.00333049	0.184869	0.0383481	0.000937786	0.0151322	0.0518997	0.0737037	0.0690925	0.00257788
Nicotra et al. (2018)		336	1008		60.7	0.48	17	4.97	0.12	1.1	5.25	4.12	5.87	0.33	99.94		54.77	0.22	28.07	0.76	0.17	0.33	10.36	4.14	1.18	100		1.01032	0.00600751	0.333464	0.0691719	0.00169157	0.0272953	0.0936163	0.132946	0.124628	0.00464995	1.80379		0.560109	0.00333049	0.184869	0.0383481	0.000937786	0.0151322	0.0518997	0.0737037	0.0690925	0.00257788
Nicotra et al. (2018)		344	1008		60.7	0.48	17	4.97	0.12	1.1	5.25	4.12	5.87	0.33	99.94		55.55	0.09	27.78	0.68	0	0.12	10.31	4.25	1.23	100.01		1.01032	0.00600751	0.333464	0.0691719	0.00169157	0.0272953	0.0936163	0.132946	0.124628	0.00464995	1.80379		0.560109	0.00333049	0.184869	0.0383481	0.000937786	0.0151322	0.0518997	0.0737037	0.0690925	0.00257788
Nicotra et al. (2018)		352	1008		60.7	0.48	17	4.97	0.12	1.1	5.25	4.12	5.87	0.33	99.94		54.9	0.3	27.63	0.83	0.28	0.28	10.63	4	1.15	100		1.01032	0.00600751	0.333464	0.0691719	0.00169157	0.0272953	0.0936163	0.132946	0.124628	0.00464995	1.80379		0.560109	0.00333049	0.184869	0.0383481	0.000937786	0.0151322	0.0518997	0.0737037	0.0690925	0.00257788
Nicotra et al. (2018)		360	1008		60.7	0.48	17	4.97	0.12	1.1	5.25	4.12	5.87	0.33	99.94		55.1	0.28	27.86	0.71	0.06	0.36	10.33	3.91	1.39	100		1.01032	0.00600751	0.333464	0.0691719	0.00169157	0.0272953	0.0936163	0.132946	0.124628	0.00464995	1.80379		0.560109	0.00333049	0.184869	0.0383481	0.000937786	0.0151322	0.0518997	0.0737037	0.0690925	0.00257788
Nicotra et al. (2018)		368	1008		60.7	0.48	17	4.97	0.12	1.1	5.25	4.12	5.87	0.33	99.94		54.78	0.13	28.15	0.7	0.14	0.29	10.91	3.88	1.02	100		1.01032	0.00600751	0.333464	0.0691719	0.00169157	0.0272953	0.0936163	0.132946	0.124628	0.00464995	1.80379		0.560109	0.00333049	0.184869	0.0383481	0.000937786	0.0151322	0.0518997	0.0737037	0.0690925	0.00257788
Nicotra et al. (2018)		376	1008		60.7	0.48	17	4.97	0.12	1.1	5.25	4.12	5.87	0.33	99.94		53.44	0.42	28.68	0.79	0.12	0.42	11.25	3.82	1.06	100		1.01032	0.00600751	0.333464	0.0691719	0.00169157	0.0272953	0.0936163	0.132946	0.124628	0.00464995	1.80379		0.560109	0.00333049	0.184869	0.0383481	0.000937786	0.0151322	0.0518997	0.0737037	0.0690925	0.00257788
Nicotra et al. (2018)		384	1008		60.7	0.48	17	4.97	0.12	1.1	5.25	4.12	5.87	0.33	99.94		54.32	0.17	28.45	0.81	0.14	0.25	11.01	3.87	0.97	99.99		1.01032	0.00600751	0.333464	0.0691719	0.00169157	0.0272953	0.0936163	0.132946	0.124628	0.00464995	1.80379		0.560109	0.00333049	0.184869	0.0383481	0.000937786	0.0151322	0.0518997	0.0737037	0.0690925	0.00257788
Nicotra et al. (2018)		392	1008		60.7	0.48	17	4.97	0.12	1.1	5.25	4.12	5.87	0.33	99.94		54.37	0.28	28.21	0.83	0.14	0.38	10.83	3.94	1.02	100		1.01032	0.00600751	0.333464	0.0691719	0.00169157	0.0272953	0.0936163	0.132946	0.124628	0.00464995	1.80379		0.560109	0.00333049	0.184869	0.0383481	0.000937786	0.0151322	0.0518997	0.0737037	0.0690925	0.00257788
Nicotra et al. (2018)		400	1008		60.7	0.48	17	4.97	0.12	1.1	5.25	4.12	5.87	0.33	99.94		55.17	0.16	27.99	0.77	0.14	0.19	10.24	4.11	1.22	99.99		1.01032	0.00600751	0.333464	0.0691719	0.00169157	0.0272953	0.0936163	0.132946	0.124628	0.00464995	1.80379		0.560109	0.00333049	0.184869	0.0383481	0.000937786	0.0151322	0.0518997	0.0737037	0.0690925	0.00257788
Nicotra et al. (2018)		408	1008		60.7	0.48	17	4.97	0.12	1.1	5.25	4.12	5.87	0.33	99.94		55.13	0.39	26.84	0.89	0.14	0.24	11.28	3.56	1.53	100		1.01032	0.00600751	0.333464	0.0691719	0.00169157	0.0272953	0.0936163	0.132946	0.124628	0.00464995	1.80379		0.560109	0.00333049	0.184869	0.0383481	0.000937786	0.0151322	0.0518997	0.0737037	0.0690925	0.00257788
Nicotra et al. (2018)		416	1008		60.7	0.48	17	4.97	0.12	1.1	5.25	4.12	5.87	0.33	99.94		55.61	0.25	27.34	0.93	0.13	0.31	9.79	4.26	1.38	100		1.01032	0.00600751	0.333464	0.0691719	0.00169157	0.0272953	0.0936163	0.132946	0.124628	0.00464995	1.80379		0.560109	0.00333049	0.184869	0.0383481	0.000937786	0.0151322	0.0518997	0.0737037	0.0690925	0.00257788
Nicotra et al. (2018)		424	1008		60.7	0.48	17	4.97	0.12	1.1	5.25	4.12	5.87	0.33	99.94		55.41	0.27	27.39	0.8	0.18	0.19	10.14	4.35	1.26	99.99		1.01032	0.00600751	0.333464	0.0691719	0.00169157	0.0272953	0.0936163	0.132946	0.124628	0.00464995	1.80379		0.560109	0.00333049	0.184869	0.0383481	0.000937786	0.0151322	0.0518997	0.0737037	0.0690925	0.00257788
Nicotra et al. (2018)		432	1008		60.7	0.48	17	4.97	0.12	1.1	5.25	4.12	5.87	0.33	99.94		54.93	0.29	27.89	0.84	0.12	0.25	10.49	4.02	1.16	99.99		1.01032	0.00600751	0.333464	0.0691719	0.00169157	0.0272953	0.0936163	0.132946	0.124628	0.00464995	1.80379		0.560109	0.00333049	0.184869	0.0383481	0.000937786	0.0151322	0.0518997	0.0737037	0.0690925	0.00257788
Nicotra et al. (2018)		440	1008		60.7	0.48	17	4.97	0.12	1.1	5.25	4.12	5.87	0.33	99.94		54.53	0.17	28.28	0.73	0.13	0.28	10.57	4.23	1.07	99.99		1.01032	0.00600751	0.333464	0.0691719	0.00169157	0.0272953	0.0936163	0.132946	0.124628	0.00464995	1.80379		0.560109	0.00333049	0.184869	0.0383481	0.000937786	0.0151322	0.0518997	0.0737037	0.0690925	0.00257788
Nicotra et al. (2018)		448	1008		60.7	0.48	17	4.97	0.12	1.1	5.25	4.12	5.87	0.33	99.94		54.11	0.37	28.27	0.86	0.15	0.32	10.72	4.12	1.08	100		1.01032	0.00600751	0.333464	0.0691719	0.00169157	0.0272953	0.0936163	0.132946	0.124628	0.00464995	1.80379		0.560109	0.00333049	0.184869	0.0383481	0.000937786	0.0151322	0.0518997	0.0737037	0.0690925	0.00257788
Nicotra et al. (2018)		456	1008		60.7	0.48	17	4.97	0.12	1.1	5.25	4.12	5.87	0.33	99.94		54.65	0.3	28.03	0.86	0.23	0.31	10.69	3.9	1.03	100		1.01032	0.00600751	0.333464	0.0691719	0.00169157	0.0272953	0.0936163	0.132946	0.124628	0.00464995	1.80379		0.560109	0.00333049	0.184869	0.0383481	0.000937786	0.0151322	0.0518997	0.0737037	0.0690925	0.00257788
Nicotra et al. (2018)		464	1008		60.7	0.48	17	4.97	0.12	1.1	5.25	4.12	5.87	0.33	99.94		54.42	0.34	27.99	0.77	0.23	0.21	10.99	4.03	1.02	100		1.01032	0.00600751	0.333464	0.0691719	0.00169157	0.0272953	0.0936163	0.132946	0.124628	0.00464995	1.80379		0.560109	0.00333049	0.184869	0.0383481	0.000937786	0.0151322	0.0518997	0.0737037	0.0690925	0.00257788
Nicotra et al. (2018)		472	1008		60.7	0.48	17	4.97	0.12	1.1	5.25	4.12	5.87	0.33	99.94		54.18	0.25	28.48	0.81	0.22	0.27	10.81	4.02	0.96	100		1.01032	0.00600751	0.333464	0.0691719	0.00169157	0.0272953	0.0936163	0.132946	0.124628	0.00464995	1.80379		0.560109	0.00333049	0.184869	0.0383481	0.000937786	0.0151322	0.0518997	0.0737037	0.0690925	0.00257788
Nicotra et al. (2018)		480	1008		60.7	0.48	17	4.97	0.12	1.1	5.25	4.12	5.87	0.33	99.94		54.6	0.23	28.16	0.84	0.16	0.21	10.88	3.89	1.04	100.01		1.01032	0.00600751	0.333464	0.0691719	0.00169157	0.0272953	0.0936163	0.132946	0.124628	0.00464995	1.80379		0.560109	0.00333049	0.184869	0.0383481	0.000937786	0.0151322	0.0518997	0.0737037	0.0690925	0.00257788
Nicotra et al. (2018)		488	1008		60.7	0.48	17	4.97	0.12	1.1	5.25	4.12	5.87	0.33	99.94		54.56	0.12	28.31	0.73	0.17	0.35	10.71	4.01	1.04	100		1.01032	0.00600751	0.333464	0.0691719	0.00169157	0.0272953	0.0936163	0.132946	0.124628	0.00464995	1.80379		0.560109	0.00333049	0.184869	0.0383481	0.000937786	0.0151322	0.0518997	0.0737037	0.0690925	0.00257788
Nicotra et al. (2018)		496	1008		60.7	0.48	17	4.97	0.12	1.1	5.25	4.12	5.87	0.33	99.94		54.91	0.32	27.98	0.76	0.19	0.25	10.13	4.29	1.18	100.01		1.01032	0.00600751	0.333464	0.0691719	0.00169157	0.0272953	0.0936163	0.132946	0.124628	0.00464995	1.80379		0.560109	0.00333049	0.184869	0.0383481	0.000937786	0.0151322	0.0518997	0.0737037	0.0690925	0.00257788
Nicotra et al. (2018)		504	1008		60.7	0.48	17	4.97	0.12	1.1	5.25	4.12	5.87	0.33	99.94		54.96	0.16	28.28	0.74	0.16	0.14	10.49	4.08	0.98	99.99		1.01032	0.00600751	0.333464	0.0691719	0.00169157	0.0272953	0.0936163	0.132946	0.124628	0.00464995	1.80379		0.560109	0.00333049	0.184869	0.0383481	0.000937786	0.0151322	0.0518997	0.0737037	0.0690925	0.00257788
Nicotra et al. (2018)		512	1008		60.7	0.48	17	4.97	0.12	1.1	5.25	4.12	5.87	0.33	99.94		55.03	0.17	27.72	0.85	0.19	0.12	10.33	4.46	1.13	100		1.01032	0.00600751	0.333464	0.0691719	0.00169157	0.0272953	0.0936163	0.132946	0.124628	0.00464995	1.80379		0.560109	0.00333049	0.184869	0.0383481	0.000937786	0.0151322	0.0518997	0.0737037	0.0690925	0.00257788
Nicotra et al. (2018)		520	1008		60.7	0.48	17	4.97	0.12	1.1	5.25	4.12	5.87	0.33	99.94		54.77	0.37	27.65	0.84	0.26	0.16	10.71	4.18	1.05	99.99		1.01032	0.00600751	0.333464	0.0691719	0.00169157	0.0272953	0.0936163	0.132946	0.124628	0.00464995	1.80379		0.560109	0.00333049	0.184869	0.0383481	0.000937786	0.0151322	0.0518997	0.0737037	0.0690925	0.00257788
Nicotra et al. (2018)		528	1008		60.7	0.48	17	4.97	0.12	1.1	5.25	4.12	5.87	0.33	99.94		54.74	0.24	28.06	0.64	0.17	0.29	10.9	4.01	0.96	100.01		1.01032	0.00600751	0.333464	0.0691719	0.00169157	0.0272953	0.0936163	0.132946	0.124628	0.00464995	1.80379		0.560109	0.00333049	0.184869	0.0383481	0.000937786	0.0151322	0.0518997	0.0737037	0.0690925	0.00257788
Nicotra et al. (2018)		536	1008		60.7	0.48	17	4.97	0.12	1.1	5.25	4.12	5.87	0.33	99.94		54.87	0.18	28.32	0.81	0	0.26	10.67	3.95	0.94	100		1.01032	0.00600751	0.333464	0.0691719	0.00169157	0.0272953	0.0936163	0.132946	0.124628	0.00464995	1.80379		0.560109	0.00333049	0.184869	0.0383481	0.000937786	0.0151322	0.0518997	0.0737037	0.0690925	0.00257788
Nicotra et al. (2018)		544	1008		60.7	0.48	17	4.97	0.12	1.1	5.25	4.12	5.87	0.33	99.94		54.08	0.23	27.95	0.84	0.16	0.32	12.06	3.38	0.99	100.01		1.01032	0.00600751	0.333464	0.0691719	0.00169157	0.0272953	0.0936163	0.132946	0.124628	0.00464995	1.80379		0.560109	0.00333049	0.184869	0.0383481	0.000937786	0.0151322	0.0518997	0.0737037	0.0690925	0.00257788
Nicotra et al. (2018)		552	1008		60.7	0.48	17	4.97	0.12	1.1	5.25	4.12	5.87	0.33	99.94		54.33	0.26	27.88	0.82	0.26	0.4	10.76	4.27	1.01	99.99		1.01032	0.00600751	0.333464	0.0691719	0.00169157	0.0272953	0.0936163	0.132946	0.124628	0.00464995	1.80379		0.560109	0.00333049	0.184869	0.0383481	0.000937786	0.0151322	0.0518997	0.0737037	0.0690925	0.00257788
Nicotra et al. (2018)		560	1008		60.7	0.48	17	4.97	0.12	1.1	5.25	4.12	5.87	0.33	99.94		54.27	0.2	28.21	0.79	0.19	0.54	10.8	4.15	0.85	100		1.01032	0.00600751	0.333464	0.0691719	0.00169157	0.0272953	0.0936163	0.132946	0.124628	0.00464995	1.80379		0.560109	0.00333049	0.184869	0.0383481	0.000937786	0.0151322	0.0518997	0.0737037	0.0690925	0.00257788
Nicotra et al. (2018)		568	1008		60.7	0.48	17	4.97	0.12	1.1	5.25	4.12	5.87	0.33	99.94		55.25	0.23	28.09	0.7	0.26	0.27	10.16	4.15	0.89	100		1.01032	0.00600751	0.333464	0.0691719	0.00169157	0.0272953	0.0936163	0.132946	0.124628	0.00464995	1.80379		0.560109	0.00333049	0.184869	0.0383481	0.000937786	0.0151322	0.0518997	0.0737037	0.0690925	0.00257788
Nicotra et al. (2018)		576	1008		60.7	0.48	17	4.97	0.12	1.1	5.25	4.12	5.87	0.33	99.94		55.29	0.21	27.79	0.68	0.13	0.25	10.2	4.36	1.09	100		1.01032	0.00600751	0.333464	0.0691719	0.00169157	0.0272953	0.0936163	0.132946	0.124628	0.00464995	1.80379		0.560109	0.00333049	0.184869	0.0383481	0.000937786	0.0151322	0.0518997	0.0737037	0.0690925	0.00257788
Nicotra et al. (2018)		584	1008		60.7	0.48	17	4.97	0.12	1.1	5.25	4.12	5.87	0.33	99.94		53.96	0.28	28.48	0.85	0.26	0.28	10.78	4.19	0.92	100		1.01032	0.00600751	0.333464	0.0691719	0.00169157	0.0272953	0.0936163	0.132946	0.124628	0.00464995	1.80379		0.560109	0.00333049	0.184869	0.0383481	0.000937786	0.0151322	0.0518997	0.0737037	0.0690925	0.00257788
Nicotra et al. (2018)		592	1008		60.7	0.48	17	4.97	0.12	1.1	5.25	4.12	5.87	0.33	99.94		54.46	0.37	27.98	0.94	0.17	0.24	10.9	4.07	0.87	100		1.01032	0.00600751	0.333464	0.0691719	0.00169157	0.0272953	0.0936163	0.132946	0.124628	0.00464995	1.80379		0.560109	0.00333049	0.184869	0.0383481	0.000937786	0.0151322	0.0518997	0.0737037	0.0690925	0.00257788
Nicotra et al. (2018)		600	1008		60.7	0.48	17	4.97	0.12	1.1	5.25	4.12	5.87	0.33	99.94		55.22	0.06	28.14	0.69	0	0.23	10.76	4.08	0.83	100.01		1.01032	0.00600751	0.333464	0.0691719	0.00169157	0.0272953	0.0936163	0.132946	0.124628	0.00464995	1.80379		0.560109	0.00333049	0.184869	0.0383481	0.000937786	0.0151322	0.0518997	0.0737037	0.0690925	0.00257788
Nicotra et al. (2018)		608	1008		60.7	0.48	17	4.97	0.12	1.1	5.25	4.12	5.87	0.33	99.94		53.92	0.21	28.67	0.88	0.21	0.32	11.09	4.02	0.68	100		1.01032	0.00600751	0.333464	0.0691719	0.00169157	0.0272953	0.0936163	0.132946	0.124628	0.00464995	1.80379		0.560109	0.00333049	0.184869	0.0383481	0.000937786	0.0151322	0.0518997	0.0737037	0.0690925	0.00257788
Nicotra et al. (2018)		616	1008		60.7	0.48	17	4.97	0.12	1.1	5.25	4.12	5.87	0.33	99.94		53.84	0.23	28.21	0.8	0.15	0.56	11.4	4.07	0.73	99.99		1.01032	0.00600751	0.333464	0.0691719	0.00169157	0.0272953	0.0936163	0.132946	0.124628	0.00464995	1.80379		0.560109	0.00333049	0.184869	0.0383481	0.000937786	0.0151322	0.0518997	0.0737037	0.0690925	0.00257788
Nicotra et al. (2018)		624	1008		60.7	0.48	17	4.97	0.12	1.1	5.25	4.12	5.87	0.33	99.94		54.4	0.27	28.06	0.83	0.13	0.29	11.13	4.16	0.74	100.01		1.01032	0.00600751	0.333464	0.0691719	0.00169157	0.0272953	0.0936163	0.132946	0.124628	0.00464995	1.80379		0.560109	0.00333049	0.184869	0.0383481	0.000937786	0.0151322	0.0518997	0.0737037	0.0690925	0.00257788
Nicotra et al. (2018)		632	1008		60.7	0.48	17	4.97	0.12	1.1	5.25	4.12	5.87	0.33	99.94		55.83	0.38	27.19	0.74	0.05	0.57	9.6	4.65	1.01	100.02		1.01032	0.00600751	0.333464	0.0691719	0.00169157	0.0272953	0.0936163	0.132946	0.124628	0.00464995	1.80379		0.560109	0.00333049	0.184869	0.0383481	0.000937786	0.0151322	0.0518997	0.0737037	0.0690925	0.00257788
Nicotra et al. (2018)		640	1008		60.7	0.48	17	4.97	0.12	1.1	5.25	4.12	5.87	0.33	99.94		55.45	0.31	27.34	0.71	0.2	0.39	10.1	4.55	0.95	100		1.01032	0.00600751	0.333464	0.0691719	0.00169157	0.0272953	0.0936163	0.132946	0.124628	0.00464995	1.80379		0.560109	0.00333049	0.184869	0.0383481	0.000937786	0.0151322	0.0518997	0.0737037	0.0690925	0.00257788
Nicotra et al. (2018)		648	1008		60.7	0.48	17	4.97	0.12	1.1	5.25	4.12	5.87	0.33	99.94		55.85	0.19	27.47	0.65	0.09	0.32	9.8	4.7	0.94	100.01		1.01032	0.00600751	0.333464	0.0691719	0.00169157	0.0272953	0.0936163	0.132946	0.124628	0.00464995	1.80379		0.560109	0.00333049	0.184869	0.0383481	0.000937786	0.0151322	0.0518997	0.0737037	0.0690925	0.00257788
Commenda Latite - VC3B Plag1		profile	1025
Nicotra et al. (2018)		0	1025		59.8	0.52	16.7	5.47	0.11	2.36	5	4.23	5.51	0.3	100		57.26	0.31	26.2	0.73	0.12	0.33	8.8	4.5	1.74	99.99		0.99534	0.00650814	0.327579	0.0761308	0.00155061	0.0585608	0.0891583	0.136496	0.116985	0.00422723	1.81254		0.549142	0.00359062	0.18073	0.0420024	0.00085549	0.0323088	0.0491898	0.0753065	0.0645423	0.00233222
Nicotra et al. (2018)		5	1025		59.8	0.52	16.7	5.47	0.11	2.36	5	4.23	5.51	0.3	100		57.27	0.14	26.3	0.72	0.1	0.62	9.09	4.07	1.68	99.99		0.99534	0.00650814	0.327579	0.0761308	0.00155061	0.0585608	0.0891583	0.136496	0.116985	0.00422723	1.81254		0.549142	0.00359062	0.18073	0.0420024	0.00085549	0.0323088	0.0491898	0.0753065	0.0645423	0.00233222
Nicotra et al. (2018)		10	1025		59.8	0.52	16.7	5.47	0.11	2.36	5	4.23	5.51	0.3	100		56.48	0.28	26.78	0.75	0.2	0.53	9.39	4	1.6	100.01		0.99534	0.00650814	0.327579	0.0761308	0.00155061	0.0585608	0.0891583	0.136496	0.116985	0.00422723	1.81254		0.549142	0.00359062	0.18073	0.0420024	0.00085549	0.0323088	0.0491898	0.0753065	0.0645423	0.00233222
Nicotra et al. (2018)		15	1025		59.8	0.52	16.7	5.47	0.11	2.36	5	4.23	5.51	0.3	100		56.28	0.16	26.76	0.94	0.17	0.31	9.58	4.32	1.47	99.99		0.99534	0.00650814	0.327579	0.0761308	0.00155061	0.0585608	0.0891583	0.136496	0.116985	0.00422723	1.81254		0.549142	0.00359062	0.18073	0.0420024	0.00085549	0.0323088	0.0491898	0.0753065	0.0645423	0.00233222
Nicotra et al. (2018)		20	1025		59.8	0.52	16.7	5.47	0.11	2.36	5	4.23	5.51	0.3	100		56.45	0.25	26.9	0.78	0.25	0.28	9.47	4.07	1.56	100.01		0.99534	0.00650814	0.327579	0.0761308	0.00155061	0.0585608	0.0891583	0.136496	0.116985	0.00422723	1.81254		0.549142	0.00359062	0.18073	0.0420024	0.00085549	0.0323088	0.0491898	0.0753065	0.0645423	0.00233222
Nicotra et al. (2018)		25	1025		59.8	0.52	16.7	5.47	0.11	2.36	5	4.23	5.51	0.3	100		57.28	0.18	26.57	0.57	0.04	0.18	9.02	4.66	1.49	99.99		0.99534	0.00650814	0.327579	0.0761308	0.00155061	0.0585608	0.0891583	0.136496	0.116985	0.00422723	1.81254		0.549142	0.00359062	0.18073	0.0420024	0.00085549	0.0323088	0.0491898	0.0753065	0.0645423	0.00233222
Nicotra et al. (2018)		30	1025		59.8	0.52	16.7	5.47	0.11	2.36	5	4.23	5.51	0.3	100		57.57	0.14	26.53	0.63	0.04	0.31	8.75	4.27	1.74	99.98		0.99534	0.00650814	0.327579	0.0761308	0.00155061	0.0585608	0.0891583	0.136496	0.116985	0.00422723	1.81254		0.549142	0.00359062	0.18073	0.0420024	0.00085549	0.0323088	0.0491898	0.0753065	0.0645423	0.00233222
Nicotra et al. (2018)		35	1025		59.8	0.52	16.7	5.47	0.11	2.36	5	4.23	5.51	0.3	100		57.06	0.25	26.61	0.68	0.07	0.36	9.14	4.2	1.62	99.99		0.99534	0.00650814	0.327579	0.0761308	0.00155061	0.0585608	0.0891583	0.136496	0.116985	0.00422723	1.81254		0.549142	0.00359062	0.18073	0.0420024	0.00085549	0.0323088	0.0491898	0.0753065	0.0645423	0.00233222
Nicotra et al. (2018)		40	1025		59.8	0.52	16.7	5.47	0.11	2.36	5	4.23	5.51	0.3	100		56.88	0.29	26.56	0.78	0.13	0.31	8.98	4.34	1.72	99.99		0.99534	0.00650814	0.327579	0.0761308	0.00155061	0.0585608	0.0891583	0.136496	0.116985	0.00422723	1.81254		0.549142	0.00359062	0.18073	0.0420024	0.00085549	0.0323088	0.0491898	0.0753065	0.0645423	0.00233222
Nicotra et al. (2018)		45	1025		59.8	0.52	16.7	5.47	0.11	2.36	5	4.23	5.51	0.3	100		57.29	0.21	26.38	0.85	0.15	0.35	8.62	4.31	1.85	100.01		0.99534	0.00650814	0.327579	0.0761308	0.00155061	0.0585608	0.0891583	0.136496	0.116985	0.00422723	1.81254		0.549142	0.00359062	0.18073	0.0420024	0.00085549	0.0323088	0.0491898	0.0753065	0.0645423	0.00233222
Nicotra et al. (2018)		50	1025		59.8	0.52	16.7	5.47	0.11	2.36	5	4.23	5.51	0.3	100		57.11	0.26	26.23	0.83	0.16	0.15	9.32	4.16	1.78	100		0.99534	0.00650814	0.327579	0.0761308	0.00155061	0.0585608	0.0891583	0.136496	0.116985	0.00422723	1.81254		0.549142	0.00359062	0.18073	0.0420024	0.00085549	0.0323088	0.0491898	0.0753065	0.0645423	0.00233222
Nicotra et al. (2018)		55	1025		59.8	0.52	16.7	5.47	0.11	2.36	5	4.23	5.51	0.3	100		56.11	0.27	26.85	0.79	0.25	0.3	9.57	4.25	1.6	99.99		0.99534	0.00650814	0.327579	0.0761308	0.00155061	0.0585608	0.0891583	0.136496	0.116985	0.00422723	1.81254		0.549142	0.00359062	0.18073	0.0420024	0.00085549	0.0323088	0.0491898	0.0753065	0.0645423	0.00233222
Nicotra et al. (2018)		60	1025		59.8	0.52	16.7	5.47	0.11	2.36	5	4.23	5.51	0.3	100		56.84	0.39	25.92	0.79	0.17	0.28	9.3	4.38	1.93	100		0.99534	0.00650814	0.327579	0.0761308	0.00155061	0.0585608	0.0891583	0.136496	0.116985	0.00422723	1.81254		0.549142	0.00359062	0.18073	0.0420024	0.00085549	0.0323088	0.0491898	0.0753065	0.0645423	0.00233222
Nicotra et al. (2018)		65	1025		59.8	0.52	16.7	5.47	0.11	2.36	5	4.23	5.51	0.3	100		56.87	0.34	26.06	0.86	0.15	0.14	9.42	4.08	2.09	100.01		0.99534	0.00650814	0.327579	0.0761308	0.00155061	0.0585608	0.0891583	0.136496	0.116985	0.00422723	1.81254		0.549142	0.00359062	0.18073	0.0420024	0.00085549	0.0323088	0.0491898	0.0753065	0.0645423	0.00233222
Nicotra et al. (2018)		70	1025		59.8	0.52	16.7	5.47	0.11	2.36	5	4.23	5.51	0.3	100		57.67	0.33	25.86	0.81	0.12	0.22	8.41	4.61	1.96	99.99		0.99534	0.00650814	0.327579	0.0761308	0.00155061	0.0585608	0.0891583	0.136496	0.116985	0.00422723	1.81254		0.549142	0.00359062	0.18073	0.0420024	0.00085549	0.0323088	0.0491898	0.0753065	0.0645423	0.00233222
Nicotra et al. (2018)		75	1025		59.8	0.52	16.7	5.47	0.11	2.36	5	4.23	5.51	0.3	100		57.07	0.23	26.68	0.66	0.1	0.37	9.08	4.21	1.6	100		0.99534	0.00650814	0.327579	0.0761308	0.00155061	0.0585608	0.0891583	0.136496	0.116985	0.00422723	1.81254		0.549142	0.00359062	0.18073	0.0420024	0.00085549	0.0323088	0.0491898	0.0753065	0.0645423	0.00233222
Nicotra et al. (2018)		80	1025		59.8	0.52	16.7	5.47	0.11	2.36	5	4.23	5.51	0.3	100		57.74	0.26	26.01	0.72	0.13	0.41	8.44	4.37	1.92	100		0.99534	0.00650814	0.327579	0.0761308	0.00155061	0.0585608	0.0891583	0.136496	0.116985	0.00422723	1.81254		0.549142	0.00359062	0.18073	0.0420024	0.00085549	0.0323088	0.0491898	0.0753065	0.0645423	0.00233222
Nicotra et al. (2018)		85	1025		59.8	0.52	16.7	5.47	0.11	2.36	5	4.23	5.51	0.3	100		58.06	0.18	26.05	0.7	0.15	0.22	8.29	4.61	1.74	100		0.99534	0.00650814	0.327579	0.0761308	0.00155061	0.0585608	0.0891583	0.136496	0.116985	0.00422723	1.81254		0.549142	0.00359062	0.18073	0.0420024	0.00085549	0.0323088	0.0491898	0.0753065	0.0645423	0.00233222
Nicotra et al. (2018)		90	1025		59.8	0.52	16.7	5.47	0.11	2.36	5	4.23	5.51	0.3	100		57.91	0.31	25.92	0.82	0.08	0.19	8.4	4.5	1.87	100		0.99534	0.00650814	0.327579	0.0761308	0.00155061	0.0585608	0.0891583	0.136496	0.116985	0.00422723	1.81254		0.549142	0.00359062	0.18073	0.0420024	0.00085549	0.0323088	0.0491898	0.0753065	0.0645423	0.00233222
Nicotra et al. (2018)		95	1025		59.8	0.52	16.7	5.47	0.11	2.36	5	4.23	5.51	0.3	100		58.22	0.4	25.66	0.81	0.15	0.35	7.86	4.63	1.91	99.99		0.99534	0.00650814	0.327579	0.0761308	0.00155061	0.0585608	0.0891583	0.136496	0.116985	0.00422723	1.81254		0.549142	0.00359062	0.18073	0.0420024	0.00085549	0.0323088	0.0491898	0.0753065	0.0645423	0.00233222
Nicotra et al. (2018)		100	1025		59.8	0.52	16.7	5.47	0.11	2.36	5	4.23	5.51	0.3	100		57.65	0.24	25.89	0.83	0	0.38	8.76	4.62	1.64	100.01		0.99534	0.00650814	0.327579	0.0761308	0.00155061	0.0585608	0.0891583	0.136496	0.116985	0.00422723	1.81254		0.549142	0.00359062	0.18073	0.0420024	0.00085549	0.0323088	0.0491898	0.0753065	0.0645423	0.00233222
Nicotra et al. (2018)		105	1025		59.8	0.52	16.7	5.47	0.11	2.36	5	4.23	5.51	0.3	100		56.29	0.27	26.04	1	0.11	0.25	10.23	3.89	1.91	99.99		0.99534	0.00650814	0.327579	0.0761308	0.00155061	0.0585608	0.0891583	0.136496	0.116985	0.00422723	1.81254		0.549142	0.00359062	0.18073	0.0420024	0.00085549	0.0323088	0.0491898	0.0753065	0.0645423	0.00233222
Nicotra et al. (2018)		110	1025		59.8	0.52	16.7	5.47	0.11	2.36	5	4.23	5.51	0.3	100		57.2	0.39	26.35	0.75	0.16	0.27	8.77	4.4	1.7	99.99		0.99534	0.00650814	0.327579	0.0761308	0.00155061	0.0585608	0.0891583	0.136496	0.116985	0.00422723	1.81254		0.549142	0.00359062	0.18073	0.0420024	0.00085549	0.0323088	0.0491898	0.0753065	0.0645423	0.00233222
Nicotra et al. (2018)		115	1025		59.8	0.52	16.7	5.47	0.11	2.36	5	4.23	5.51	0.3	100		57.45	0.3	26.49	0.76	0.11	0.33	8.41	4.65	1.51	100.01		0.99534	0.00650814	0.327579	0.0761308	0.00155061	0.0585608	0.0891583	0.136496	0.116985	0.00422723	1.81254		0.549142	0.00359062	0.18073	0.0420024	0.00085549	0.0323088	0.0491898	0.0753065	0.0645423	0.00233222
Nicotra et al. (2018)		120	1025		59.8	0.52	16.7	5.47	0.11	2.36	5	4.23	5.51	0.3	100		57.74	0.18	26.18	0.74	0.1	0.38	8.34	4.61	1.73	100		0.99534	0.00650814	0.327579	0.0761308	0.00155061	0.0585608	0.0891583	0.136496	0.116985	0.00422723	1.81254		0.549142	0.00359062	0.18073	0.0420024	0.00085549	0.0323088	0.0491898	0.0753065	0.0645423	0.00233222
Nicotra et al. (2018)		125	1025		59.8	0.52	16.7	5.47	0.11	2.36	5	4.23	5.51	0.3	100		57.88	0	26.3	0.55	0	0.26	8.58	4.67	1.75	99.99		0.99534	0.00650814	0.327579	0.0761308	0.00155061	0.0585608	0.0891583	0.136496	0.116985	0.00422723	1.81254		0.549142	0.00359062	0.18073	0.0420024	0.00085549	0.0323088	0.0491898	0.0753065	0.0645423	0.00233222
Nicotra et al. (2018)		130	1025		59.8	0.52	16.7	5.47	0.11	2.36	5	4.23	5.51	0.3	100		58.68	0.18	25.9	0.73	0	0.35	7.9	4.38	1.89	100.01		0.99534	0.00650814	0.327579	0.0761308	0.00155061	0.0585608	0.0891583	0.136496	0.116985	0.00422723	1.81254		0.549142	0.00359062	0.18073	0.0420024	0.00085549	0.0323088	0.0491898	0.0753065	0.0645423	0.00233222
Nicotra et al. (2018)		135	1025		59.8	0.52	16.7	5.47	0.11	2.36	5	4.23	5.51	0.3	100		58.23	0.22	25.96	0.62	0.06	0.3	8.15	4.38	2.09	100.01		0.99534	0.00650814	0.327579	0.0761308	0.00155061	0.0585608	0.0891583	0.136496	0.116985	0.00422723	1.81254		0.549142	0.00359062	0.18073	0.0420024	0.00085549	0.0323088	0.0491898	0.0753065	0.0645423	0.00233222
Nicotra et al. (2018)		140	1025		59.8	0.52	16.7	5.47	0.11	2.36	5	4.23	5.51	0.3	100		58.45	0.19	25.45	0.82	0.15	0.27	7.87	4.74	2.06	100		0.99534	0.00650814	0.327579	0.0761308	0.00155061	0.0585608	0.0891583	0.136496	0.116985	0.00422723	1.81254		0.549142	0.00359062	0.18073	0.0420024	0.00085549	0.0323088	0.0491898	0.0753065	0.0645423	0.00233222
Nicotra et al. (2018)		145	1025		59.8	0.52	16.7	5.47	0.11	2.36	5	4.23	5.51	0.3	100		57.6	0.26	25.97	0.75	0.14	0.37	8.53	4.48	1.9	100		0.99534	0.00650814	0.327579	0.0761308	0.00155061	0.0585608	0.0891583	0.136496	0.116985	0.00422723	1.81254		0.549142	0.00359062	0.18073	0.0420024	0.00085549	0.0323088	0.0491898	0.0753065	0.0645423	0.00233222
Nicotra et al. (2018)		150	1025		59.8	0.52	16.7	5.47	0.11	2.36	5	4.23	5.51	0.3	100		57.82	0.16	26.29	0.77	0.06	0.18	8.02	4.74	1.95	99.99		0.99534	0.00650814	0.327579	0.0761308	0.00155061	0.0585608	0.0891583	0.136496	0.116985	0.00422723	1.81254		0.549142	0.00359062	0.18073	0.0420024	0.00085549	0.0323088	0.0491898	0.0753065	0.0645423	0.00233222
Nicotra et al. (2018)		155	1025		59.8	0.52	16.7	5.47	0.11	2.36	5	4.23	5.51	0.3	100		57.85	0.28	26.06	0.78	0.14	0.31	8.17	4.58	1.83	100		0.99534	0.00650814	0.327579	0.0761308	0.00155061	0.0585608	0.0891583	0.136496	0.116985	0.00422723	1.81254		0.549142	0.00359062	0.18073	0.0420024	0.00085549	0.0323088	0.0491898	0.0753065	0.0645423	0.00233222
Nicotra et al. (2018)		160	1025		59.8	0.52	16.7	5.47	0.11	2.36	5	4.23	5.51	0.3	100		57.61	0.26	26.38	0.81	0.15	0.21	8.7	4.22	1.66	100		0.99534	0.00650814	0.327579	0.0761308	0.00155061	0.0585608	0.0891583	0.136496	0.116985	0.00422723	1.81254		0.549142	0.00359062	0.18073	0.0420024	0.00085549	0.0323088	0.0491898	0.0753065	0.0645423	0.00233222
Nicotra et al. (2018)		165	1025		59.8	0.52	16.7	5.47	0.11	2.36	5	4.23	5.51	0.3	100		58.18	0.26	24.98	1.08	0.17	0.42	7.48	4.3	3.13	100		0.99534	0.00650814	0.327579	0.0761308	0.00155061	0.0585608	0.0891583	0.136496	0.116985	0.00422723	1.81254		0.549142	0.00359062	0.18073	0.0420024	0.00085549	0.0323088	0.0491898	0.0753065	0.0645423	0.00233222
Commenda Latite - VC3B Plag2		profile	1025
Nicotra et al. (2018)		0	1025		59.8	0.52	16.7	5.47	0.11	2.36	5	4.23	5.51	0.3	100		54.18	0.28	27.29	1.04	0.12	0.24	11.98	3.41	1.46	100		0.99534	0.00650814	0.327579	0.0761308	0.00155061	0.0585608	0.0891583	0.136496	0.116985	0.00422723	1.81254		0.549142	0.00359062	0.18073	0.0420024	0.00085549	0.0323088	0.0491898	0.0753065	0.0645423	0.00233222
Nicotra et al. (2018)		5	1025		59.8	0.52	16.7	5.47	0.11	2.36	5	4.23	5.51	0.3	100		55.27	0.23	27.43	0.85	0.14	0.24	10.37	4.26	1.2	99.99		0.99534	0.00650814	0.327579	0.0761308	0.00155061	0.0585608	0.0891583	0.136496	0.116985	0.00422723	1.81254		0.549142	0.00359062	0.18073	0.0420024	0.00085549	0.0323088	0.0491898	0.0753065	0.0645423	0.00233222
Nicotra et al. (2018)		10	1025		59.8	0.52	16.7	5.47	0.11	2.36	5	4.23	5.51	0.3	100		55.1	0.29	27.63	0.76	0.13	0.28	10.18	4.46	1.17	100		0.99534	0.00650814	0.327579	0.0761308	0.00155061	0.0585608	0.0891583	0.136496	0.116985	0.00422723	1.81254		0.549142	0.00359062	0.18073	0.0420024	0.00085549	0.0323088	0.0491898	0.0753065	0.0645423	0.00233222
Nicotra et al. (2018)		15	1025		59.8	0.52	16.7	5.47	0.11	2.36	5	4.23	5.51	0.3	100		53.9	0.32	27.96	0.8	0.23	0.16	12.01	3.44	1.18	100		0.99534	0.00650814	0.327579	0.0761308	0.00155061	0.0585608	0.0891583	0.136496	0.116985	0.00422723	1.81254		0.549142	0.00359062	0.18073	0.0420024	0.00085549	0.0323088	0.0491898	0.0753065	0.0645423	0.00233222
Nicotra et al. (2018)		20	1025		59.8	0.52	16.7	5.47	0.11	2.36	5	4.23	5.51	0.3	100		55.06	0.21	27.97	0.68	0.15	0.16	10.11	4.58	1.07	99.99		0.99534	0.00650814	0.327579	0.0761308	0.00155061	0.0585608	0.0891583	0.136496	0.116985	0.00422723	1.81254		0.549142	0.00359062	0.18073	0.0420024	0.00085549	0.0323088	0.0491898	0.0753065	0.0645423	0.00233222
Nicotra et al. (2018)		25	1025		59.8	0.52	16.7	5.47	0.11	2.36	5	4.23	5.51	0.3	100		54.89	0.22	28.02	0.74	0.2	0.15	10.57	4.09	1.12	100		0.99534	0.00650814	0.327579	0.0761308	0.00155061	0.0585608	0.0891583	0.136496	0.116985	0.00422723	1.81254		0.549142	0.00359062	0.18073	0.0420024	0.00085549	0.0323088	0.0491898	0.0753065	0.0645423	0.00233222
Nicotra et al. (2018)		30	1025		59.8	0.52	16.7	5.47	0.11	2.36	5	4.23	5.51	0.3	100		55.21	0.27	27.67	0.84	0.2	0.33	10.2	4.1	1.18	100		0.99534	0.00650814	0.327579	0.0761308	0.00155061	0.0585608	0.0891583	0.136496	0.116985	0.00422723	1.81254		0.549142	0.00359062	0.18073	0.0420024	0.00085549	0.0323088	0.0491898	0.0753065	0.0645423	0.00233222
Nicotra et al. (2018)		35	1025		59.8	0.52	16.7	5.47	0.11	2.36	5	4.23	5.51	0.3	100		55.64	0.22	27.15	0.82	0.1	0.29	10.09	4.36	1.33	100		0.99534	0.00650814	0.327579	0.0761308	0.00155061	0.0585608	0.0891583	0.136496	0.116985	0.00422723	1.81254		0.549142	0.00359062	0.18073	0.0420024	0.00085549	0.0323088	0.0491898	0.0753065	0.0645423	0.00233222
Nicotra et al. (2018)		40	1025		59.8	0.52	16.7	5.47	0.11	2.36	5	4.23	5.51	0.3	100		56.62	0.21	26.88	0.77	0.13	0.21	8.81	4.86	1.52	100.01		0.99534	0.00650814	0.327579	0.0761308	0.00155061	0.0585608	0.0891583	0.136496	0.116985	0.00422723	1.81254		0.549142	0.00359062	0.18073	0.0420024	0.00085549	0.0323088	0.0491898	0.0753065	0.0645423	0.00233222
Nicotra et al. (2018)		45	1025		59.8	0.52	16.7	5.47	0.11	2.36	5	4.23	5.51	0.3	100		57.05	0.1	26.65	0.68	0.16	0.27	8.71	4.89	1.49	100		0.99534	0.00650814	0.327579	0.0761308	0.00155061	0.0585608	0.0891583	0.136496	0.116985	0.00422723	1.81254		0.549142	0.00359062	0.18073	0.0420024	0.00085549	0.0323088	0.0491898	0.0753065	0.0645423	0.00233222
Nicotra et al. (2018)		50	1025		59.8	0.52	16.7	5.47	0.11	2.36	5	4.23	5.51	0.3	100		56.54	0.21	26.69	0.61	0.13	0.19	9.67	4.36	1.6	100		0.99534	0.00650814	0.327579	0.0761308	0.00155061	0.0585608	0.0891583	0.136496	0.116985	0.00422723	1.81254		0.549142	0.00359062	0.18073	0.0420024	0.00085549	0.0323088	0.0491898	0.0753065	0.0645423	0.00233222
Nicotra et al. (2018)		55	1025		59.8	0.52	16.7	5.47	0.11	2.36	5	4.23	5.51	0.3	100		56.78	0.26	26.62	0.82	0.1	0.14	9.41	4.36	1.51	100		0.99534	0.00650814	0.327579	0.0761308	0.00155061	0.0585608	0.0891583	0.136496	0.116985	0.00422723	1.81254		0.549142	0.00359062	0.18073	0.0420024	0.00085549	0.0323088	0.0491898	0.0753065	0.0645423	0.00233222
Nicotra et al. (2018)		60	1025		59.8	0.52	16.7	5.47	0.11	2.36	5	4.23	5.51	0.3	100		56.24	0.25	26.46	0.91	0.22	0.28	9.34	4.68	1.63	100.01		0.99534	0.00650814	0.327579	0.0761308	0.00155061	0.0585608	0.0891583	0.136496	0.116985	0.00422723	1.81254		0.549142	0.00359062	0.18073	0.0420024	0.00085549	0.0323088	0.0491898	0.0753065	0.0645423	0.00233222
Nicotra et al. (2018)		65	1025		59.8	0.52	16.7	5.47	0.11	2.36	5	4.23	5.51	0.3	100		55.97	0.29	27.08	0.74	0.1	0.36	9.27	4.7	1.48	99.99		0.99534	0.00650814	0.327579	0.0761308	0.00155061	0.0585608	0.0891583	0.136496	0.116985	0.00422723	1.81254		0.549142	0.00359062	0.18073	0.0420024	0.00085549	0.0323088	0.0491898	0.0753065	0.0645423	0.00233222
Nicotra et al. (2018)		70	1025		59.8	0.52	16.7	5.47	0.11	2.36	5	4.23	5.51	0.3	100		56.08	0.44	26.7	0.8	0.15	0.29	9.32	4.59	1.62	99.99		0.99534	0.00650814	0.327579	0.0761308	0.00155061	0.0585608	0.0891583	0.136496	0.116985	0.00422723	1.81254		0.549142	0.00359062	0.18073	0.0420024	0.00085549	0.0323088	0.0491898	0.0753065	0.0645423	0.00233222
Nicotra et al. (2018)		75	1025		59.8	0.52	16.7	5.47	0.11	2.36	5	4.23	5.51	0.3	100		56.38	0.15	26.87	0.7	0.1	0.25	9.52	4.63	1.39	99.99		0.99534	0.00650814	0.327579	0.0761308	0.00155061	0.0585608	0.0891583	0.136496	0.116985	0.00422723	1.81254		0.549142	0.00359062	0.18073	0.0420024	0.00085549	0.0323088	0.0491898	0.0753065	0.0645423	0.00233222
Nicotra et al. (2018)		80	1025		59.8	0.52	16.7	5.47	0.11	2.36	5	4.23	5.51	0.3	100		54.54	0.32	27.34	0.76	0.15	0.14	11.84	3.64	1.27	100		0.99534	0.00650814	0.327579	0.0761308	0.00155061	0.0585608	0.0891583	0.136496	0.116985	0.00422723	1.81254		0.549142	0.00359062	0.18073	0.0420024	0.00085549	0.0323088	0.0491898	0.0753065	0.0645423	0.00233222
Nicotra et al. (2018)		85	1025		59.8	0.52	16.7	5.47	0.11	2.36	5	4.23	5.51	0.3	100		55.43	0.2	27.32	0.8	0	0.18	10.65	4.02	1.39	99.99		0.99534	0.00650814	0.327579	0.0761308	0.00155061	0.0585608	0.0891583	0.136496	0.116985	0.00422723	1.81254		0.549142	0.00359062	0.18073	0.0420024	0.00085549	0.0323088	0.0491898	0.0753065	0.0645423	0.00233222
Nicotra et al. (2018)		90	1025		59.8	0.52	16.7	5.47	0.11	2.36	5	4.23	5.51	0.3	100		55.08	0.33	27.08	0.86	0.32	0.31	10.16	4.5	1.34	99.98		0.99534	0.00650814	0.327579	0.0761308	0.00155061	0.0585608	0.0891583	0.136496	0.116985	0.00422723	1.81254		0.549142	0.00359062	0.18073	0.0420024	0.00085549	0.0323088	0.0491898	0.0753065	0.0645423	0.00233222
Nicotra et al. (2018)		95	1025		59.8	0.52	16.7	5.47	0.11	2.36	5	4.23	5.51	0.3	100		56.37	0.13	27.06	0.71	0.19	0.3	9.19	4.73	1.34	100.02		0.99534	0.00650814	0.327579	0.0761308	0.00155061	0.0585608	0.0891583	0.136496	0.116985	0.00422723	1.81254		0.549142	0.00359062	0.18073	0.0420024	0.00085549	0.0323088	0.0491898	0.0753065	0.0645423	0.00233222
Nicotra et al. (2018)		100	1025		59.8	0.52	16.7	5.47	0.11	2.36	5	4.23	5.51	0.3	100		56.08	0.25	26.74	0.95	0.15	0.24	9.76	4.39	1.42	99.98		0.99534	0.00650814	0.327579	0.0761308	0.00155061	0.0585608	0.0891583	0.136496	0.116985	0.00422723	1.81254		0.549142	0.00359062	0.18073	0.0420024	0.00085549	0.0323088	0.0491898	0.0753065	0.0645423	0.00233222
Nicotra et al. (2018)		105	1025		59.8	0.52	16.7	5.47	0.11	2.36	5	4.23	5.51	0.3	100		56.65	0.28	27.07	0.73	0.14	0.17	8.82	4.75	1.4	100.01		0.99534	0.00650814	0.327579	0.0761308	0.00155061	0.0585608	0.0891583	0.136496	0.116985	0.00422723	1.81254		0.549142	0.00359062	0.18073	0.0420024	0.00085549	0.0323088	0.0491898	0.0753065	0.0645423	0.00233222
Nicotra et al. (2018)		110	1025		59.8	0.52	16.7	5.47	0.11	2.36	5	4.23	5.51	0.3	100		55.91	0.21	26.85	0.83	0.19	0.3	9.55	4.62	1.54	100		0.99534	0.00650814	0.327579	0.0761308	0.00155061	0.0585608	0.0891583	0.136496	0.116985	0.00422723	1.81254		0.549142	0.00359062	0.18073	0.0420024	0.00085549	0.0323088	0.0491898	0.0753065	0.0645423	0.00233222
Nicotra et al. (2018)		115	1025		59.8	0.52	16.7	5.47	0.11	2.36	5	4.23	5.51	0.3	100		55.7	0.28	26.14	0.97	0.27	0.18	10.39	4.27	1.79	99.99		0.99534	0.00650814	0.327579	0.0761308	0.00155061	0.0585608	0.0891583	0.136496	0.116985	0.00422723	1.81254		0.549142	0.00359062	0.18073	0.0420024	0.00085549	0.0323088	0.0491898	0.0753065	0.0645423	0.00233222
Nicotra et al. (2018)		120	1025		59.8	0.52	16.7	5.47	0.11	2.36	5	4.23	5.51	0.3	100		56.68	0.22	26.48	0.82	0.13	0.28	9.26	4.34	1.79	100		0.99534	0.00650814	0.327579	0.0761308	0.00155061	0.0585608	0.0891583	0.136496	0.116985	0.00422723	1.81254		0.549142	0.00359062	0.18073	0.0420024	0.00085549	0.0323088	0.0491898	0.0753065	0.0645423	0.00233222
Nicotra et al. (2018)		125	1025		59.8	0.52	16.7	5.47	0.11	2.36	5	4.23	5.51	0.3	100		55.87	0.23	26.57	1.19	0	0.27	10.11	4.19	1.56	99.99		0.99534	0.00650814	0.327579	0.0761308	0.00155061	0.0585608	0.0891583	0.136496	0.116985	0.00422723	1.81254		0.549142	0.00359062	0.18073	0.0420024	0.00085549	0.0323088	0.0491898	0.0753065	0.0645423	0.00233222
Nicotra et al. (2018)		130	1025		59.8	0.52	16.7	5.47	0.11	2.36	5	4.23	5.51	0.3	100		56.72	0.19	26.86	0.81	0.07	0.14	8.85	4.84	1.52	100		0.99534	0.00650814	0.327579	0.0761308	0.00155061	0.0585608	0.0891583	0.136496	0.116985	0.00422723	1.81254		0.549142	0.00359062	0.18073	0.0420024	0.00085549	0.0323088	0.0491898	0.0753065	0.0645423	0.00233222
Nicotra et al. (2018)		135	1025		59.8	0.52	16.7	5.47	0.11	2.36	5	4.23	5.51	0.3	100		57.09	0.18	26.64	0.71	0.08	0.16	8.73	4.63	1.76	99.98		0.99534	0.00650814	0.327579	0.0761308	0.00155061	0.0585608	0.0891583	0.136496	0.116985	0.00422723	1.81254		0.549142	0.00359062	0.18073	0.0420024	0.00085549	0.0323088	0.0491898	0.0753065	0.0645423	0.00233222
Nicotra et al. (2018)		140	1025		59.8	0.52	16.7	5.47	0.11	2.36	5	4.23	5.51	0.3	100		57.28	0.29	26.27	0.71	0.13	0.2	8.72	4.7	1.69	99.99		0.99534	0.00650814	0.327579	0.0761308	0.00155061	0.0585608	0.0891583	0.136496	0.116985	0.00422723	1.81254		0.549142	0.00359062	0.18073	0.0420024	0.00085549	0.0323088	0.0491898	0.0753065	0.0645423	0.00233222
Nicotra et al. (2018)		145	1025		59.8	0.52	16.7	5.47	0.11	2.36	5	4.23	5.51	0.3	100		54.84	0.34	26.27	0.81	0.18	0.25	11.86	3.43	2	99.98		0.99534	0.00650814	0.327579	0.0761308	0.00155061	0.0585608	0.0891583	0.136496	0.116985	0.00422723	1.81254		0.549142	0.00359062	0.18073	0.0420024	0.00085549	0.0323088	0.0491898	0.0753065	0.0645423	0.00233222
Nicotra et al. (2018)		150	1025		59.8	0.52	16.7	5.47	0.11	2.36	5	4.23	5.51	0.3	100		56.97	0.23	26.52	0.74	0.12	0.4	8.17	5.3	1.54	99.99		0.99534	0.00650814	0.327579	0.0761308	0.00155061	0.0585608	0.0891583	0.136496	0.116985	0.00422723	1.81254		0.549142	0.00359062	0.18073	0.0420024	0.00085549	0.0323088	0.0491898	0.0753065	0.0645423	0.00233222
Nicotra et al. (2018)		155	1025		59.8	0.52	16.7	5.47	0.11	2.36	5	4.23	5.51	0.3	100		57.65	0.23	25.78	0.78	0.19	0.33	8.05	4.97	2.01	99.99		0.99534	0.00650814	0.327579	0.0761308	0.00155061	0.0585608	0.0891583	0.136496	0.116985	0.00422723	1.81254		0.549142	0.00359062	0.18073	0.0420024	0.00085549	0.0323088	0.0491898	0.0753065	0.0645423	0.00233222
Nicotra et al. (2018)		160	1025		59.8	0.52	16.7	5.47	0.11	2.36	5	4.23	5.51	0.3	100		56.62	0.31	26.75	0.67	0.04	0.2	9.19	4.56	1.65	99.99		0.99534	0.00650814	0.327579	0.0761308	0.00155061	0.0585608	0.0891583	0.136496	0.116985	0.00422723	1.81254		0.549142	0.00359062	0.18073	0.0420024	0.00085549	0.0323088	0.0491898	0.0753065	0.0645423	0.00233222
Nicotra et al. (2018)		165	1025		59.8	0.52	16.7	5.47	0.11	2.36	5	4.23	5.51	0.3	100		56.93	0.22	26.19	0.69	0.2	0.25	8.79	5.04	1.68	99.99		0.99534	0.00650814	0.327579	0.0761308	0.00155061	0.0585608	0.0891583	0.136496	0.116985	0.00422723	1.81254		0.549142	0.00359062	0.18073	0.0420024	0.00085549	0.0323088	0.0491898	0.0753065	0.0645423	0.00233222
Nicotra et al. (2018)		170	1025		59.8	0.52	16.7	5.47	0.11	2.36	5	4.23	5.51	0.3	100		56.31	0.14	27.16	0.64	0	0.28	9.1	5.12	1.28	100.03		0.99534	0.00650814	0.327579	0.0761308	0.00155061	0.0585608	0.0891583	0.136496	0.116985	0.00422723	1.81254		0.549142	0.00359062	0.18073	0.0420024	0.00085549	0.0323088	0.0491898	0.0753065	0.0645423	0.00233222
Nicotra et al. (2018)		175	1025		59.8	0.52	16.7	5.47	0.11	2.36	5	4.23	5.51	0.3	100		57.54	0.27	25.94	0.69	0.16	0.23	8.47	4.88	1.82	100		0.99534	0.00650814	0.327579	0.0761308	0.00155061	0.0585608	0.0891583	0.136496	0.116985	0.00422723	1.81254		0.549142	0.00359062	0.18073	0.0420024	0.00085549	0.0323088	0.0491898	0.0753065	0.0645423	0.00233222
Nicotra et al. (2018)		180	1025		59.8	0.52	16.7	5.47	0.11	2.36	5	4.23	5.51	0.3	100		57.22	0.21	26.13	0.69	0.17	0.21	9.28	4.13	1.96	100		0.99534	0.00650814	0.327579	0.0761308	0.00155061	0.0585608	0.0891583	0.136496	0.116985	0.00422723	1.81254		0.549142	0.00359062	0.18073	0.0420024	0.00085549	0.0323088	0.0491898	0.0753065	0.0645423	0.00233222
Nicotra et al. (2018)		185	1025		59.8	0.52	16.7	5.47	0.11	2.36	5	4.23	5.51	0.3	100		57.61	0.09	26.65	0.64	0	0.15	8.12	5.17	1.57	100		0.99534	0.00650814	0.327579	0.0761308	0.00155061	0.0585608	0.0891583	0.136496	0.116985	0.00422723	1.81254		0.549142	0.00359062	0.18073	0.0420024	0.00085549	0.0323088	0.0491898	0.0753065	0.0645423	0.00233222
Nicotra et al. (2018)		190	1025		59.8	0.52	16.7	5.47	0.11	2.36	5	4.23	5.51	0.3	100		56.82	0.26	25.81	1.11	0.2	0.36	9.71	3.59	2.15	100.01		0.99534	0.00650814	0.327579	0.0761308	0.00155061	0.0585608	0.0891583	0.136496	0.116985	0.00422723	1.81254		0.549142	0.00359062	0.18073	0.0420024	0.00085549	0.0323088	0.0491898	0.0753065	0.0645423	0.00233222
Nicotra et al. (2018)		195	1025		59.8	0.52	16.7	5.47	0.11	2.36	5	4.23	5.51	0.3	100		56.69	0.32	26.21	0.89	0.06	0.38	9.69	3.98	1.8	100.02		0.99534	0.00650814	0.327579	0.0761308	0.00155061	0.0585608	0.0891583	0.136496	0.116985	0.00422723	1.81254		0.549142	0.00359062	0.18073	0.0420024	0.00085549	0.0323088	0.0491898	0.0753065	0.0645423	0.00233222
Nicotra et al. (2018)		200	1025		59.8	0.52	16.7	5.47	0.11	2.36	5	4.23	5.51	0.3	100		56.12	0.26	26.79	0.76	0.13	0.2	9.58	4.44	1.71	99.99		0.99534	0.00650814	0.327579	0.0761308	0.00155061	0.0585608	0.0891583	0.136496	0.116985	0.00422723	1.81254		0.549142	0.00359062	0.18073	0.0420024	0.00085549	0.0323088	0.0491898	0.0753065	0.0645423	0.00233222
Nicotra et al. (2018)		205	1025		59.8	0.52	16.7	5.47	0.11	2.36	5	4.23	5.51	0.3	100		56.71	0.26	26.14	0.81	0.11	0.22	9.45	4.47	1.84	100.01		0.99534	0.00650814	0.327579	0.0761308	0.00155061	0.0585608	0.0891583	0.136496	0.116985	0.00422723	1.81254		0.549142	0.00359062	0.18073	0.0420024	0.00085549	0.0323088	0.0491898	0.0753065	0.0645423	0.00233222
Nicotra et al. (2018)		210	1025		59.8	0.52	16.7	5.47	0.11	2.36	5	4.23	5.51	0.3	100		56.85	0.21	26.62	0.76	0.1	0.15	8.61	5.08	1.61	99.99		0.99534	0.00650814	0.327579	0.0761308	0.00155061	0.0585608	0.0891583	0.136496	0.116985	0.00422723	1.81254		0.549142	0.00359062	0.18073	0.0420024	0.00085549	0.0323088	0.0491898	0.0753065	0.0645423	0.00233222
Nicotra et al. (2018)		215	1025		59.8	0.52	16.7	5.47	0.11	2.36	5	4.23	5.51	0.3	100		56.9	0.24	26.15	0.89	0	0.34	9	4.81	1.68	100.01		0.99534	0.00650814	0.327579	0.0761308	0.00155061	0.0585608	0.0891583	0.136496	0.116985	0.00422723	1.81254		0.549142	0.00359062	0.18073	0.0420024	0.00085549	0.0323088	0.0491898	0.0753065	0.0645423	0.00233222
Nicotra et al. (2018)		220	1025		59.8	0.52	16.7	5.47	0.11	2.36	5	4.23	5.51	0.3	100		56.8	0.14	26.71	0.64	0	0.16	9.42	4.52	1.61	100		0.99534	0.00650814	0.327579	0.0761308	0.00155061	0.0585608	0.0891583	0.136496	0.116985	0.00422723	1.81254		0.549142	0.00359062	0.18073	0.0420024	0.00085549	0.0323088	0.0491898	0.0753065	0.0645423	0.00233222
Nicotra et al. (2018)		225	1025		59.8	0.52	16.7	5.47	0.11	2.36	5	4.23	5.51	0.3	100		55.6	0.18	27.48	0.71	0.23	0.29	9.85	4.29	1.37	100		0.99534	0.00650814	0.327579	0.0761308	0.00155061	0.0585608	0.0891583	0.136496	0.116985	0.00422723	1.81254		0.549142	0.00359062	0.18073	0.0420024	0.00085549	0.0323088	0.0491898	0.0753065	0.0645423	0.00233222
Nicotra et al. (2018)		230	1025		59.8	0.52	16.7	5.47	0.11	2.36	5	4.23	5.51	0.3	100		56.17	0.18	26.34	0.8	0	0.22	10.25	4.39	1.66	100.01		0.99534	0.00650814	0.327579	0.0761308	0.00155061	0.0585608	0.0891583	0.136496	0.116985	0.00422723	1.81254		0.549142	0.00359062	0.18073	0.0420024	0.00085549	0.0323088	0.0491898	0.0753065	0.0645423	0.00233222
Nicotra et al. (2018)		235	1025		59.8	0.52	16.7	5.47	0.11	2.36	5	4.23	5.51	0.3	100		58.14	0.21	25.8	0.76	0	0.23	7.72	5.21	1.93	100		0.99534	0.00650814	0.327579	0.0761308	0.00155061	0.0585608	0.0891583	0.136496	0.116985	0.00422723	1.81254		0.549142	0.00359062	0.18073	0.0420024	0.00085549	0.0323088	0.0491898	0.0753065	0.0645423	0.00233222
Nicotra et al. (2018)		240	1025		59.8	0.52	16.7	5.47	0.11	2.36	5	4.23	5.51	0.3	100		57.03	0.33	26.54	0.69	0.08	0.27	8.46	4.95	1.65	100		0.99534	0.00650814	0.327579	0.0761308	0.00155061	0.0585608	0.0891583	0.136496	0.116985	0.00422723	1.81254		0.549142	0.00359062	0.18073	0.0420024	0.00085549	0.0323088	0.0491898	0.0753065	0.0645423	0.00233222
Nicotra et al. (2018)		245	1025		59.8	0.52	16.7	5.47	0.11	2.36	5	4.23	5.51	0.3	100		56.61	0.29	26.36	0.89	0.2	0.32	8.91	4.89	1.53	100		0.99534	0.00650814	0.327579	0.0761308	0.00155061	0.0585608	0.0891583	0.136496	0.116985	0.00422723	1.81254		0.549142	0.00359062	0.18073	0.0420024	0.00085549	0.0323088	0.0491898	0.0753065	0.0645423	0.00233222
Nicotra et al. (2018)		250	1025		59.8	0.52	16.7	5.47	0.11	2.36	5	4.23	5.51	0.3	100		56.43	0.29	26.58	0.75	0.18	0.24	9.05	4.78	1.7	100		0.99534	0.00650814	0.327579	0.0761308	0.00155061	0.0585608	0.0891583	0.136496	0.116985	0.00422723	1.81254		0.549142	0.00359062	0.18073	0.0420024	0.00085549	0.0323088	0.0491898	0.0753065	0.0645423	0.00233222
Nicotra et al. (2018)		255	1025		59.8	0.52	16.7	5.47	0.11	2.36	5	4.23	5.51	0.3	100		56.99	0.24	26.52	0.66	0.05	0.24	8.9	4.72	1.68	100		0.99534	0.00650814	0.327579	0.0761308	0.00155061	0.0585608	0.0891583	0.136496	0.116985	0.00422723	1.81254		0.549142	0.00359062	0.18073	0.0420024	0.00085549	0.0323088	0.0491898	0.0753065	0.0645423	0.00233222
Nicotra et al. (2018)		260	1025		59.8	0.52	16.7	5.47	0.11	2.36	5	4.23	5.51	0.3	100		55.29	0.56	25.73	1.17	0.4	0.19	10.87	3.54	2.26	100.01		0.99534	0.00650814	0.327579	0.0761308	0.00155061	0.0585608	0.0891583	0.136496	0.116985	0.00422723	1.81254		0.549142	0.00359062	0.18073	0.0420024	0.00085549	0.0323088	0.0491898	0.0753065	0.0645423	0.00233222
Nicotra et al. (2018)		265	1025		59.8	0.52	16.7	5.47	0.11	2.36	5	4.23	5.51	0.3	100		56.77	0.28	26.29	0.82	0.16	0.17	9.12	4.72	1.66	99.99		0.99534	0.00650814	0.327579	0.0761308	0.00155061	0.0585608	0.0891583	0.136496	0.116985	0.00422723	1.81254		0.549142	0.00359062	0.18073	0.0420024	0.00085549	0.0323088	0.0491898	0.0753065	0.0645423	0.00233222
Nicotra et al. (2018)		270	1025		59.8	0.52	16.7	5.47	0.11	2.36	5	4.23	5.51	0.3	100		56.17	0.36	26.21	1.01	0.25	0.21	9.4	4.55	1.85	100.01		0.99534	0.00650814	0.327579	0.0761308	0.00155061	0.0585608	0.0891583	0.136496	0.116985	0.00422723	1.81254		0.549142	0.00359062	0.18073	0.0420024	0.00085549	0.0323088	0.0491898	0.0753065	0.0645423	0.00233222
Nicotra et al. (2018)		275	1025		59.8	0.52	16.7	5.47	0.11	2.36	5	4.23	5.51	0.3	100		55.78	0.21	26.48	0.77	0.12	0.22	10.39	4.25	1.78	100		0.99534	0.00650814	0.327579	0.0761308	0.00155061	0.0585608	0.0891583	0.136496	0.116985	0.00422723	1.81254		0.549142	0.00359062	0.18073	0.0420024	0.00085549	0.0323088	0.0491898	0.0753065	0.0645423	0.00233222
Nicotra et al. (2018)		280	1025		59.8	0.52	16.7	5.47	0.11	2.36	5	4.23	5.51	0.3	100		56.96	0.21	26.22	0.82	0.09	0.17	9.22	4.65	1.66	100		0.99534	0.00650814	0.327579	0.0761308	0.00155061	0.0585608	0.0891583	0.136496	0.116985	0.00422723	1.81254		0.549142	0.00359062	0.18073	0.0420024	0.00085549	0.0323088	0.0491898	0.0753065	0.0645423	0.00233222
Nicotra et al. (2018)		290	1025		59.8	0.52	16.7	5.47	0.11	2.36	5	4.23	5.51	0.3	100		56.93	0.65	26.11	0.77	0.14	0.29	8.68	4.4	2.03	100		0.99534	0.00650814	0.327579	0.0761308	0.00155061	0.0585608	0.0891583	0.136496	0.116985	0.00422723	1.81254		0.549142	0.00359062	0.18073	0.0420024	0.00085549	0.0323088	0.0491898	0.0753065	0.0645423	0.00233222
Nicotra et al. (2018)		295	1025		59.8	0.52	16.7	5.47	0.11	2.36	5	4.23	5.51	0.3	100		55.31	0.31	26.29	1.13	0.23	0.36	10.91	3.89	1.56	99.99		0.99534	0.00650814	0.327579	0.0761308	0.00155061	0.0585608	0.0891583	0.136496	0.116985	0.00422723	1.81254		0.549142	0.00359062	0.18073	0.0420024	0.00085549	0.0323088	0.0491898	0.0753065	0.0645423	0.00233222
Pietre Cotte Trachyte - VPC Plag1		profile	1008
Nicotra et al. (2018)		0	1008		59.2	0.56	16.4	6.77	0.13	2.35	4.5	4.14	5.63	0.38	100.06		54.63	0.15	28.88	0.8	0	0.21	10	4.38	0.85	99.9		0.985353	0.00700876	0.321695	0.0942241	0.00183253	0.0583127	0.0802425	0.133591	0.119533	0.00535449	1.80715		0.545253	0.00387836	0.178013	0.0521397	0.00101405	0.0322678	0.0444029	0.073924	0.0661445	0.00296295
Nicotra et al. (2018)		10	1008		59.2	0.56	16.4	6.77	0.13	2.35	4.5	4.14	5.63	0.38	100.06		55.59	0.28	27.49	0.76	0	0.24	8.93	4.9	1.24	99.43		0.985353	0.00700876	0.321695	0.0942241	0.00183253	0.0583127	0.0802425	0.133591	0.119533	0.00535449	1.80715		0.545253	0.00387836	0.178013	0.0521397	0.00101405	0.0322678	0.0444029	0.073924	0.0661445	0.00296295
Nicotra et al. (2018)		20	1008		59.2	0.56	16.4	6.77	0.13	2.35	4.5	4.14	5.63	0.38	100.06		56.41	0.21	27.37	0.61	0	0.25	8.4	5.16	1.38	99.79		0.985353	0.00700876	0.321695	0.0942241	0.00183253	0.0583127	0.0802425	0.133591	0.119533	0.00535449	1.80715		0.545253	0.00387836	0.178013	0.0521397	0.00101405	0.0322678	0.0444029	0.073924	0.0661445	0.00296295
Nicotra et al. (2018)		30	1008		59.2	0.56	16.4	6.77	0.13	2.35	4.5	4.14	5.63	0.38	100.06		56.23	0.19	27.28	0.69	0	0.3	8.73	4.93	1.38	99.73		0.985353	0.00700876	0.321695	0.0942241	0.00183253	0.0583127	0.0802425	0.133591	0.119533	0.00535449	1.80715		0.545253	0.00387836	0.178013	0.0521397	0.00101405	0.0322678	0.0444029	0.073924	0.0661445	0.00296295
Nicotra et al. (2018)		40	1008		59.2	0.56	16.4	6.77	0.13	2.35	4.5	4.14	5.63	0.38	100.06		56.56	0.26	26.99	0.76	0	0.21	8.45	4.97	1.51	99.71		0.985353	0.00700876	0.321695	0.0942241	0.00183253	0.0583127	0.0802425	0.133591	0.119533	0.00535449	1.80715		0.545253	0.00387836	0.178013	0.0521397	0.00101405	0.0322678	0.0444029	0.073924	0.0661445	0.00296295
Nicotra et al. (2018)		50	1008		59.2	0.56	16.4	6.77	0.13	2.35	4.5	4.14	5.63	0.38	100.06		56.79	0.22	27.06	0.68	0	0.3	8.28	4.97	1.49	99.79		0.985353	0.00700876	0.321695	0.0942241	0.00183253	0.0583127	0.0802425	0.133591	0.119533	0.00535449	1.80715		0.545253	0.00387836	0.178013	0.0521397	0.00101405	0.0322678	0.0444029	0.073924	0.0661445	0.00296295
Nicotra et al. (2018)		60	1008		59.2	0.56	16.4	6.77	0.13	2.35	4.5	4.14	5.63	0.38	100.06		55.72	0.27	27.46	0.82	0	0.19	9.31	4.52	1.36	99.65		0.985353	0.00700876	0.321695	0.0942241	0.00183253	0.0583127	0.0802425	0.133591	0.119533	0.00535449	1.80715		0.545253	0.00387836	0.178013	0.0521397	0.00101405	0.0322678	0.0444029	0.073924	0.0661445	0.00296295
Nicotra et al. (2018)		70	1008		59.2	0.56	16.4	6.77	0.13	2.35	4.5	4.14	5.63	0.38	100.06		56	0.3	27.37	0.8	0	0.11	8.88	4.78	1.4	99.64		0.985353	0.00700876	0.321695	0.0942241	0.00183253	0.0583127	0.0802425	0.133591	0.119533	0.00535449	1.80715		0.545253	0.00387836	0.178013	0.0521397	0.00101405	0.0322678	0.0444029	0.073924	0.0661445	0.00296295
Nicotra et al. (2018)		80	1008		59.2	0.56	16.4	6.77	0.13	2.35	4.5	4.14	5.63	0.38	100.06		56.68	0.07	27.45	0.6	0	0.22	8.72	4.86	1.3	99.9		0.985353	0.00700876	0.321695	0.0942241	0.00183253	0.0583127	0.0802425	0.133591	0.119533	0.00535449	1.80715		0.545253	0.00387836	0.178013	0.0521397	0.00101405	0.0322678	0.0444029	0.073924	0.0661445	0.00296295
Nicotra et al. (2018)		90	1008		59.2	0.56	16.4	6.77	0.13	2.35	4.5	4.14	5.63	0.38	100.06		55.72	0.38	27.54	0.8	0	0.23	9.02	4.54	1.43	99.66		0.985353	0.00700876	0.321695	0.0942241	0.00183253	0.0583127	0.0802425	0.133591	0.119533	0.00535449	1.80715		0.545253	0.00387836	0.178013	0.0521397	0.00101405	0.0322678	0.0444029	0.073924	0.0661445	0.00296295
Nicotra et al. (2018)		100	1008		59.2	0.56	16.4	6.77	0.13	2.35	4.5	4.14	5.63	0.38	100.06		56.8	0.16	27.17	0.7	0	0.2	7.33	6.11	1.24	99.71		0.985353	0.00700876	0.321695	0.0942241	0.00183253	0.0583127	0.0802425	0.133591	0.119533	0.00535449	1.80715		0.545253	0.00387836	0.178013	0.0521397	0.00101405	0.0322678	0.0444029	0.073924	0.0661445	0.00296295
Nicotra et al. (2018)		110	1008		59.2	0.56	16.4	6.77	0.13	2.35	4.5	4.14	5.63	0.38	100.06		56.8	0.15	27.05	0.76	0	0.31	8.33	4.82	1.56	99.78		0.985353	0.00700876	0.321695	0.0942241	0.00183253	0.0583127	0.0802425	0.133591	0.119533	0.00535449	1.80715		0.545253	0.00387836	0.178013	0.0521397	0.00101405	0.0322678	0.0444029	0.073924	0.0661445	0.00296295
Nicotra et al. (2018)		120	1008		59.2	0.56	16.4	6.77	0.13	2.35	4.5	4.14	5.63	0.38	100.06		56.11	0.29	27.01	0.65	0	0.34	8.56	5.11	1.52	99.59		0.985353	0.00700876	0.321695	0.0942241	0.00183253	0.0583127	0.0802425	0.133591	0.119533	0.00535449	1.80715		0.545253	0.00387836	0.178013	0.0521397	0.00101405	0.0322678	0.0444029	0.073924	0.0661445	0.00296295
Nicotra et al. (2018)		130	1008		59.2	0.56	16.4	6.77	0.13	2.35	4.5	4.14	5.63	0.38	100.06		53.49	0.25	29.3	0.73	0	0.29	11	3.9	0.82	99.78		0.985353	0.00700876	0.321695	0.0942241	0.00183253	0.0583127	0.0802425	0.133591	0.119533	0.00535449	1.80715		0.545253	0.00387836	0.178013	0.0521397	0.00101405	0.0322678	0.0444029	0.073924	0.0661445	0.00296295
Nicotra et al. (2018)		140	1008		59.2	0.56	16.4	6.77	0.13	2.35	4.5	4.14	5.63	0.38	100.06		54.91	0.14	28.4	0.8	0	0.15	9.6	4.7	1.04	99.74		0.985353	0.00700876	0.321695	0.0942241	0.00183253	0.0583127	0.0802425	0.133591	0.119533	0.00535449	1.80715		0.545253	0.00387836	0.178013	0.0521397	0.00101405	0.0322678	0.0444029	0.073924	0.0661445	0.00296295
Nicotra et al. (2018)		150	1008		59.2	0.56	16.4	6.77	0.13	2.35	4.5	4.14	5.63	0.38	100.06		55.73	0.27	27.39	0.78	0	0.24	8.83	4.84	1.42	99.5		0.985353	0.00700876	0.321695	0.0942241	0.00183253	0.0583127	0.0802425	0.133591	0.119533	0.00535449	1.80715		0.545253	0.00387836	0.178013	0.0521397	0.00101405	0.0322678	0.0444029	0.073924	0.0661445	0.00296295
Nicotra et al. (2018)		160	1008		59.2	0.56	16.4	6.77	0.13	2.35	4.5	4.14	5.63	0.38	100.06		56.18	0.14	27.5	0.7	0	0.19	8.81	4.91	1.31	99.74		0.985353	0.00700876	0.321695	0.0942241	0.00183253	0.0583127	0.0802425	0.133591	0.119533	0.00535449	1.80715		0.545253	0.00387836	0.178013	0.0521397	0.00101405	0.0322678	0.0444029	0.073924	0.0661445	0.00296295
Nicotra et al. (2018)		170	1008		59.2	0.56	16.4	6.77	0.13	2.35	4.5	4.14	5.63	0.38	100.06		56.26	0.25	27.36	0.61	0	0.2	8.77	4.91	1.33	99.69		0.985353	0.00700876	0.321695	0.0942241	0.00183253	0.0583127	0.0802425	0.133591	0.119533	0.00535449	1.80715		0.545253	0.00387836	0.178013	0.0521397	0.00101405	0.0322678	0.0444029	0.073924	0.0661445	0.00296295
Nicotra et al. (2018)		180	1008		59.2	0.56	16.4	6.77	0.13	2.35	4.5	4.14	5.63	0.38	100.06		55.54	0.23	27.71	0.67	0	0.22	9.25	4.86	1.15	99.63		0.985353	0.00700876	0.321695	0.0942241	0.00183253	0.0583127	0.0802425	0.133591	0.119533	0.00535449	1.80715		0.545253	0.00387836	0.178013	0.0521397	0.00101405	0.0322678	0.0444029	0.073924	0.0661445	0.00296295
Nicotra et al. (2018)		190	1008		59.2	0.56	16.4	6.77	0.13	2.35	4.5	4.14	5.63	0.38	100.06		55.58	0.21	27.95	0.66	0	0.19	9.25	4.77	1.18	99.79		0.985353	0.00700876	0.321695	0.0942241	0.00183253	0.0583127	0.0802425	0.133591	0.119533	0.00535449	1.80715		0.545253	0.00387836	0.178013	0.0521397	0.00101405	0.0322678	0.0444029	0.073924	0.0661445	0.00296295
Nicotra et al. (2018)		200	1008		59.2	0.56	16.4	6.77	0.13	2.35	4.5	4.14	5.63	0.38	100.06		56.78	0	27.61	0.63	0	0.27	8.64	4.77	1.31	100.01		0.985353	0.00700876	0.321695	0.0942241	0.00183253	0.0583127	0.0802425	0.133591	0.119533	0.00535449	1.80715		0.545253	0.00387836	0.178013	0.0521397	0.00101405	0.0322678	0.0444029	0.073924	0.0661445	0.00296295
Nicotra et al. (2018)		210	1008		59.2	0.56	16.4	6.77	0.13	2.35	4.5	4.14	5.63	0.38	100.06		55.98	0.23	27.2	0.71	0	0.31	8.7	5.01	1.4	99.54		0.985353	0.00700876	0.321695	0.0942241	0.00183253	0.0583127	0.0802425	0.133591	0.119533	0.00535449	1.80715		0.545253	0.00387836	0.178013	0.0521397	0.00101405	0.0322678	0.0444029	0.073924	0.0661445	0.00296295
Nicotra et al. (2018)		220	1008		59.2	0.56	16.4	6.77	0.13	2.35	4.5	4.14	5.63	0.38	100.06		55.87	0.28	27.34	0.8	0	0.23	8.78	4.83	1.3	99.43		0.985353	0.00700876	0.321695	0.0942241	0.00183253	0.0583127	0.0802425	0.133591	0.119533	0.00535449	1.80715		0.545253	0.00387836	0.178013	0.0521397	0.00101405	0.0322678	0.0444029	0.073924	0.0661445	0.00296295
Nicotra et al. (2018)		230	1008		59.2	0.56	16.4	6.77	0.13	2.35	4.5	4.14	5.63	0.38	100.06		55.87	0.17	27.8	0.79	0	0.42	8.31	5.37	0.95	99.68		0.985353	0.00700876	0.321695	0.0942241	0.00183253	0.0583127	0.0802425	0.133591	0.119533	0.00535449	1.80715		0.545253	0.00387836	0.178013	0.0521397	0.00101405	0.0322678	0.0444029	0.073924	0.0661445	0.00296295
Nicotra et al. (2018)		240	1008		59.2	0.56	16.4	6.77	0.13	2.35	4.5	4.14	5.63	0.38	100.06		56.21	0.21	27.4	0.8	0	0.08	8.88	4.82	1.44	99.84		0.985353	0.00700876	0.321695	0.0942241	0.00183253	0.0583127	0.0802425	0.133591	0.119533	0.00535449	1.80715		0.545253	0.00387836	0.178013	0.0521397	0.00101405	0.0322678	0.0444029	0.073924	0.0661445	0.00296295
Nicotra et al. (2018)		250	1008		59.2	0.56	16.4	6.77	0.13	2.35	4.5	4.14	5.63	0.38	100.06		54.93	0.44	27.04	0.87	0	0.23	10.44	3.84	1.9	99.69		0.985353	0.00700876	0.321695	0.0942241	0.00183253	0.0583127	0.0802425	0.133591	0.119533	0.00535449	1.80715		0.545253	0.00387836	0.178013	0.0521397	0.00101405	0.0322678	0.0444029	0.073924	0.0661445	0.00296295
Nicotra et al. (2018)		260	1008		59.2	0.56	16.4	6.77	0.13	2.35	4.5	4.14	5.63	0.38	100.06		56.24	0.22	27.35	0.55	0	0.17	8.43	5.18	1.35	99.49		0.985353	0.00700876	0.321695	0.0942241	0.00183253	0.0583127	0.0802425	0.133591	0.119533	0.00535449	1.80715		0.545253	0.00387836	0.178013	0.0521397	0.00101405	0.0322678	0.0444029	0.073924	0.0661445	0.00296295
Nicotra et al. (2018)		270	1008		59.2	0.56	16.4	6.77	0.13	2.35	4.5	4.14	5.63	0.38	100.06		53.58	0.23	29.55	0.61	0	0.21	10.66	4.16	0.82	99.82		0.985353	0.00700876	0.321695	0.0942241	0.00183253	0.0583127	0.0802425	0.133591	0.119533	0.00535449	1.80715		0.545253	0.00387836	0.178013	0.0521397	0.00101405	0.0322678	0.0444029	0.073924	0.0661445	0.00296295
Nicotra et al. (2018)		280	1008		59.2	0.56	16.4	6.77	0.13	2.35	4.5	4.14	5.63	0.38	100.06		54.62	0.17	28.72	0.72	0	0.28	9.76	4.39	0.94	99.6		0.985353	0.00700876	0.321695	0.0942241	0.00183253	0.0583127	0.0802425	0.133591	0.119533	0.00535449	1.80715		0.545253	0.00387836	0.178013	0.0521397	0.00101405	0.0322678	0.0444029	0.073924	0.0661445	0.00296295
Nicotra et al. (2018)		290	1008		59.2	0.56	16.4	6.77	0.13	2.35	4.5	4.14	5.63	0.38	100.06		53.01	0.26	29.72	0.64	0	0.24	10.94	3.93	0.78	99.52		0.985353	0.00700876	0.321695	0.0942241	0.00183253	0.0583127	0.0802425	0.133591	0.119533	0.00535449	1.80715		0.545253	0.00387836	0.178013	0.0521397	0.00101405	0.0322678	0.0444029	0.073924	0.0661445	0.00296295
Nicotra et al. (2018)		300	1008		59.2	0.56	16.4	6.77	0.13	2.35	4.5	4.14	5.63	0.38	100.06		53.24	0.15	29.81	0.65	0	0.35	11.03	3.82	0.76	99.81		0.985353	0.00700876	0.321695	0.0942241	0.00183253	0.0583127	0.0802425	0.133591	0.119533	0.00535449	1.80715		0.545253	0.00387836	0.178013	0.0521397	0.00101405	0.0322678	0.0444029	0.073924	0.0661445	0.00296295
Nicotra et al. (2018)		310	1008		59.2	0.56	16.4	6.77	0.13	2.35	4.5	4.14	5.63	0.38	100.06		53.6	0.17	29.05	0.8	0	0.33	10.41	4.65	0.76	99.77		0.985353	0.00700876	0.321695	0.0942241	0.00183253	0.0583127	0.0802425	0.133591	0.119533	0.00535449	1.80715		0.545253	0.00387836	0.178013	0.0521397	0.00101405	0.0322678	0.0444029	0.073924	0.0661445	0.00296295
Nicotra et al. (2018)		320	1008		59.2	0.56	16.4	6.77	0.13	2.35	4.5	4.14	5.63	0.38	100.06		54.82	0.14	28.66	0.7	0	0.37	9.73	4.55	0.96	99.93		0.985353	0.00700876	0.321695	0.0942241	0.00183253	0.0583127	0.0802425	0.133591	0.119533	0.00535449	1.80715		0.545253	0.00387836	0.178013	0.0521397	0.00101405	0.0322678	0.0444029	0.073924	0.0661445	0.00296295
Nicotra et al. (2018)		330	1008		59.2	0.56	16.4	6.77	0.13	2.35	4.5	4.14	5.63	0.38	100.06		56.56	0.2	26.91	0.69	0	0.22	8.46	5.25	1.44	99.73		0.985353	0.00700876	0.321695	0.0942241	0.00183253	0.0583127	0.0802425	0.133591	0.119533	0.00535449	1.80715		0.545253	0.00387836	0.178013	0.0521397	0.00101405	0.0322678	0.0444029	0.073924	0.0661445	0.00296295
Nicotra et al. (2018)		340	1008		59.2	0.56	16.4	6.77	0.13	2.35	4.5	4.14	5.63	0.38	100.06		56.48	0.19	27.16	0.61	0	0.13	8.5	5.4	1.28	99.75		0.985353	0.00700876	0.321695	0.0942241	0.00183253	0.0583127	0.0802425	0.133591	0.119533	0.00535449	1.80715		0.545253	0.00387836	0.178013	0.0521397	0.00101405	0.0322678	0.0444029	0.073924	0.0661445	0.00296295
Nicotra et al. (2018)		350	1008		59.2	0.56	16.4	6.77	0.13	2.35	4.5	4.14	5.63	0.38	100.06		55.85	0.23	27.69	0.69	0	0.38	8.55	5.12	1.35	99.86		0.985353	0.00700876	0.321695	0.0942241	0.00183253	0.0583127	0.0802425	0.133591	0.119533	0.00535449	1.80715		0.545253	0.00387836	0.178013	0.0521397	0.00101405	0.0322678	0.0444029	0.073924	0.0661445	0.00296295
Nicotra et al. (2018)		360	1008		59.2	0.56	16.4	6.77	0.13	2.35	4.5	4.14	5.63	0.38	100.06		56.69	0.08	27.28	0.5	0	0.17	8.1	5.54	1.3	99.66		0.985353	0.00700876	0.321695	0.0942241	0.00183253	0.0583127	0.0802425	0.133591	0.119533	0.00535449	1.80715		0.545253	0.00387836	0.178013	0.0521397	0.00101405	0.0322678	0.0444029	0.073924	0.0661445	0.00296295
Nicotra et al. (2018)		370	1008		59.2	0.56	16.4	6.77	0.13	2.35	4.5	4.14	5.63	0.38	100.06		56.9	0.15	27.07	0.58	0	0.21	8.63	4.79	1.57	99.9		0.985353	0.00700876	0.321695	0.0942241	0.00183253	0.0583127	0.0802425	0.133591	0.119533	0.00535449	1.80715		0.545253	0.00387836	0.178013	0.0521397	0.00101405	0.0322678	0.0444029	0.073924	0.0661445	0.00296295
Nicotra et al. (2018)		380	1008		59.2	0.56	16.4	6.77	0.13	2.35	4.5	4.14	5.63	0.38	100.06		57.13	0.15	26.82	0.65	0	0.25	7.81	5.39	1.58	99.78		0.985353	0.00700876	0.321695	0.0942241	0.00183253	0.0583127	0.0802425	0.133591	0.119533	0.00535449	1.80715		0.545253	0.00387836	0.178013	0.0521397	0.00101405	0.0322678	0.0444029	0.073924	0.0661445	0.00296295
Nicotra et al. (2018)		390	1008		59.2	0.56	16.4	6.77	0.13	2.35	4.5	4.14	5.63	0.38	100.06		57.21	0.09	26.95	0.61	0	0.07	7.78	5.48	1.48	99.67		0.985353	0.00700876	0.321695	0.0942241	0.00183253	0.0583127	0.0802425	0.133591	0.119533	0.00535449	1.80715		0.545253	0.00387836	0.178013	0.0521397	0.00101405	0.0322678	0.0444029	0.073924	0.0661445	0.00296295
Nicotra et al. (2018)		400	1008		59.2	0.56	16.4	6.77	0.13	2.35	4.5	4.14	5.63	0.38	100.06		57.08	0.17	26.58	0.69	0	0.38	8.14	5.03	1.6	99.67		0.985353	0.00700876	0.321695	0.0942241	0.00183253	0.0583127	0.0802425	0.133591	0.119533	0.00535449	1.80715		0.545253	0.00387836	0.178013	0.0521397	0.00101405	0.0322678	0.0444029	0.073924	0.0661445	0.00296295
Nicotra et al. (2018)		410	1008		59.2	0.56	16.4	6.77	0.13	2.35	4.5	4.14	5.63	0.38	100.06		54.88	0.17	28.01	0.69	0	0.23	9.65	4.95	1.13	99.71		0.985353	0.00700876	0.321695	0.0942241	0.00183253	0.0583127	0.0802425	0.133591	0.119533	0.00535449	1.80715		0.545253	0.00387836	0.178013	0.0521397	0.00101405	0.0322678	0.0444029	0.073924	0.0661445	0.00296295
Nicotra et al. (2018)		420	1008		59.2	0.56	16.4	6.77	0.13	2.35	4.5	4.14	5.63	0.38	100.06		55.26	0.17	28.09	0.8	0	0.16	9.39	4.81	1.03	99.71		0.985353	0.00700876	0.321695	0.0942241	0.00183253	0.0583127	0.0802425	0.133591	0.119533	0.00535449	1.80715		0.545253	0.00387836	0.178013	0.0521397	0.00101405	0.0322678	0.0444029	0.073924	0.0661445	0.00296295
Nicotra et al. (2018)		430	1008		59.2	0.56	16.4	6.77	0.13	2.35	4.5	4.14	5.63	0.38	100.06		57.11	0.15	27.03	0.6	0	0.27	8.18	5.02	1.53	99.89		0.985353	0.00700876	0.321695	0.0942241	0.00183253	0.0583127	0.0802425	0.133591	0.119533	0.00535449	1.80715		0.545253	0.00387836	0.178013	0.0521397	0.00101405	0.0322678	0.0444029	0.073924	0.0661445	0.00296295
Nicotra et al. (2018)		440	1008		59.2	0.56	16.4	6.77	0.13	2.35	4.5	4.14	5.63	0.38	100.06		56.78	0.25	26.86	0.75	0	0.1	8.22	5.16	1.46	99.58		0.985353	0.00700876	0.321695	0.0942241	0.00183253	0.0583127	0.0802425	0.133591	0.119533	0.00535449	1.80715		0.545253	0.00387836	0.178013	0.0521397	0.00101405	0.0322678	0.0444029	0.073924	0.0661445	0.00296295
Nicotra et al. (2018)		450	1008		59.2	0.56	16.4	6.77	0.13	2.35	4.5	4.14	5.63	0.38	100.06		56.57	0.18	27.21	0.7	0	0.07	8.49	5.09	1.43	99.74		0.985353	0.00700876	0.321695	0.0942241	0.00183253	0.0583127	0.0802425	0.133591	0.119533	0.00535449	1.80715		0.545253	0.00387836	0.178013	0.0521397	0.00101405	0.0322678	0.0444029	0.073924	0.0661445	0.00296295
Nicotra et al. (2018)		460	1008		59.2	0.56	16.4	6.77	0.13	2.35	4.5	4.14	5.63	0.38	100.06		55.92	0.36	27.03	0.82	0	0.4	9.04	4.63	1.52	99.72		0.985353	0.00700876	0.321695	0.0942241	0.00183253	0.0583127	0.0802425	0.133591	0.119533	0.00535449	1.80715		0.545253	0.00387836	0.178013	0.0521397	0.00101405	0.0322678	0.0444029	0.073924	0.0661445	0.00296295
Nicotra et al. (2018)		470	1008		59.2	0.56	16.4	6.77	0.13	2.35	4.5	4.14	5.63	0.38	100.06		56.25	0.29	27.16	0.67	0	0.29	8.92	4.64	1.51	99.73		0.985353	0.00700876	0.321695	0.0942241	0.00183253	0.0583127	0.0802425	0.133591	0.119533	0.00535449	1.80715		0.545253	0.00387836	0.178013	0.0521397	0.00101405	0.0322678	0.0444029	0.073924	0.0661445	0.00296295
Nicotra et al. (2018)		480	1008		59.2	0.56	16.4	6.77	0.13	2.35	4.5	4.14	5.63	0.38	100.06		56.23	0.16	26.39	0.83	0	0.24	9.36	4.81	1.69	99.71		0.985353	0.00700876	0.321695	0.0942241	0.00183253	0.0583127	0.0802425	0.133591	0.119533	0.00535449	1.80715		0.545253	0.00387836	0.178013	0.0521397	0.00101405	0.0322678	0.0444029	0.073924	0.0661445	0.00296295
Nicotra et al. (2018)		490	1008		59.2	0.56	16.4	6.77	0.13	2.35	4.5	4.14	5.63	0.38	100.06		56.3	0.23	27.48	0.72	0	0.19	8.41	5.19	1.19	99.71		0.985353	0.00700876	0.321695	0.0942241	0.00183253	0.0583127	0.0802425	0.133591	0.119533	0.00535449	1.80715		0.545253	0.00387836	0.178013	0.0521397	0.00101405	0.0322678	0.0444029	0.073924	0.0661445	0.00296295
Nicotra et al. (2018)		500	1008		59.2	0.56	16.4	6.77	0.13	2.35	4.5	4.14	5.63	0.38	100.06		56.13	0.22	27.64	0.55	0	0.21	8.95	5.22	0.76	99.68		0.985353	0.00700876	0.321695	0.0942241	0.00183253	0.0583127	0.0802425	0.133591	0.119533	0.00535449	1.80715		0.545253	0.00387836	0.178013	0.0521397	0.00101405	0.0322678	0.0444029	0.073924	0.0661445	0.00296295
Nicotra et al. (2018)		510	1008		59.2	0.56	16.4	6.77	0.13	2.35	4.5	4.14	5.63	0.38	100.06		54.22	0.26	28.86	0.7	0	0.26	10.02	4.56	0.75	99.63		0.985353	0.00700876	0.321695	0.0942241	0.00183253	0.0583127	0.0802425	0.133591	0.119533	0.00535449	1.80715		0.545253	0.00387836	0.178013	0.0521397	0.00101405	0.0322678	0.0444029	0.073924	0.0661445	0.00296295
Nicotra et al. (2018)		520	1008		59.2	0.56	16.4	6.77	0.13	2.35	4.5	4.14	5.63	0.38	100.06		53.13	0.2	29.02	0.7	0	0.26	11.78	3.59	0.93	99.61		0.985353	0.00700876	0.321695	0.0942241	0.00183253	0.0583127	0.0802425	0.133591	0.119533	0.00535449	1.80715		0.545253	0.00387836	0.178013	0.0521397	0.00101405	0.0322678	0.0444029	0.073924	0.0661445	0.00296295
Nicotra et al. (2018)		530	1008		59.2	0.56	16.4	6.77	0.13	2.35	4.5	4.14	5.63	0.38	100.06		58.58	0.08	26.06	0.55	0	0.22	6.92	5.68	1.92	100.01		0.985353	0.00700876	0.321695	0.0942241	0.00183253	0.0583127	0.0802425	0.133591	0.119533	0.00535449	1.80715		0.545253	0.00387836	0.178013	0.0521397	0.00101405	0.0322678	0.0444029	0.073924	0.0661445	0.00296295
Nicotra et al. (2018)		540	1008		59.2	0.56	16.4	6.77	0.13	2.35	4.5	4.14	5.63	0.38	100.06		57.68	0.14	26.2	0.63	0	0.28	7.41	5.44	1.98	99.76		0.985353	0.00700876	0.321695	0.0942241	0.00183253	0.0583127	0.0802425	0.133591	0.119533	0.00535449	1.80715		0.545253	0.00387836	0.178013	0.0521397	0.00101405	0.0322678	0.0444029	0.073924	0.0661445	0.00296295
Nicotra et al. (2018)		550	1008		59.2	0.56	16.4	6.77	0.13	2.35	4.5	4.14	5.63	0.38	100.06		58.13	0.32	25.39	0.8	0	0.34	6.96	5.53	2.23	99.7		0.985353	0.00700876	0.321695	0.0942241	0.00183253	0.0583127	0.0802425	0.133591	0.119533	0.00535449	1.80715		0.545253	0.00387836	0.178013	0.0521397	0.00101405	0.0322678	0.0444029	0.073924	0.0661445	0.00296295
Nicotra et al. (2018)		560	1008		59.2	0.56	16.4	6.77	0.13	2.35	4.5	4.14	5.63	0.38	100.06		57.16	0.19	26.55	0.7	0	0.22	7.84	5.46	1.63	99.75		0.985353	0.00700876	0.321695	0.0942241	0.00183253	0.0583127	0.0802425	0.133591	0.119533	0.00535449	1.80715		0.545253	0.00387836	0.178013	0.0521397	0.00101405	0.0322678	0.0444029	0.073924	0.0661445	0.00296295
Nicotra et al. (2018)		570	1008		59.2	0.56	16.4	6.77	0.13	2.35	4.5	4.14	5.63	0.38	100.06		56.83	0.31	26.37	0.76	0	0.37	8.29	4.95	1.72	99.6		0.985353	0.00700876	0.321695	0.0942241	0.00183253	0.0583127	0.0802425	0.133591	0.119533	0.00535449	1.80715		0.545253	0.00387836	0.178013	0.0521397	0.00101405	0.0322678	0.0444029	0.073924	0.0661445	0.00296295
Nicotra et al. (2018)		580	1008		59.2	0.56	16.4	6.77	0.13	2.35	4.5	4.14	5.63	0.38	100.06		59.01	0.17	25.38	0.58	0	0.23	6.33	6.1	2	99.8		0.985353	0.00700876	0.321695	0.0942241	0.00183253	0.0583127	0.0802425	0.133591	0.119533	0.00535449	1.80715		0.545253	0.00387836	0.178013	0.0521397	0.00101405	0.0322678	0.0444029	0.073924	0.0661445	0.00296295
Nicotra et al. (2018)		590	1008		59.2	0.56	16.4	6.77	0.13	2.35	4.5	4.14	5.63	0.38	100.06		57.5	0.09	27	0.55	0	0.22	7.53	5.56	1.56	100.01		0.985353	0.00700876	0.321695	0.0942241	0.00183253	0.0583127	0.0802425	0.133591	0.119533	0.00535449	1.80715		0.545253	0.00387836	0.178013	0.0521397	0.00101405	0.0322678	0.0444029	0.073924	0.0661445	0.00296295
Nicotra et al. (2018)		600	1008		59.2	0.56	16.4	6.77	0.13	2.35	4.5	4.14	5.63	0.38	100.06		57.69	0.18	26.22	0.56	0	0.15	7.82	5.21	1.96	99.79		0.985353	0.00700876	0.321695	0.0942241	0.00183253	0.0583127	0.0802425	0.133591	0.119533	0.00535449	1.80715		0.545253	0.00387836	0.178013	0.0521397	0.00101405	0.0322678	0.0444029	0.073924	0.0661445	0.00296295
Nicotra et al. (2018)		610	1008		59.2	0.56	16.4	6.77	0.13	2.35	4.5	4.14	5.63	0.38	100.06		57.8	0.11	26.08	0.74	0	0.32	7.32	5.53	1.86	99.76		0.985353	0.00700876	0.321695	0.0942241	0.00183253	0.0583127	0.0802425	0.133591	0.119533	0.00535449	1.80715		0.545253	0.00387836	0.178013	0.0521397	0.00101405	0.0322678	0.0444029	0.073924	0.0661445	0.00296295
Nicotra et al. (2018)		620	1008		59.2	0.56	16.4	6.77	0.13	2.35	4.5	4.14	5.63	0.38	100.06		57.6	0.16	26.46	0.65	0	0.3	7.63	5.36	1.6	99.76		0.985353	0.00700876	0.321695	0.0942241	0.00183253	0.0583127	0.0802425	0.133591	0.119533	0.00535449	1.80715		0.545253	0.00387836	0.178013	0.0521397	0.00101405	0.0322678	0.0444029	0.073924	0.0661445	0.00296295
Nicotra et al. (2018)		630	1008		59.2	0.56	16.4	6.77	0.13	2.35	4.5	4.14	5.63	0.38	100.06		57.07	0.22	26.7	0.64	0	0.11	8.21	5.23	1.51	99.69		0.985353	0.00700876	0.321695	0.0942241	0.00183253	0.0583127	0.0802425	0.133591	0.119533	0.00535449	1.80715		0.545253	0.00387836	0.178013	0.0521397	0.00101405	0.0322678	0.0444029	0.073924	0.0661445	0.00296295
Pietre Cotte Trachyte - VPC Plag3		profile	1008
Nicotra et al. (2018)		0	1008		59.2	0.56	16.4	6.77	0.13	2.35	4.5	4.14	5.63	0.38	100.06		54.77	0.24	28.31	0.62	0	0.18	9.61	4.81	1.11	99.65		0.985353	0.00700876	0.321695	0.0942241	0.00183253	0.0583127	0.0802425	0.133591	0.119533	0.00535449	1.80715		0.545253	0.00387836	0.178013	0.0521397	0.00101405	0.0322678	0.0444029	0.073924	0.0661445	0.00296295
Nicotra et al. (2018)		10	1008		59.2	0.56	16.4	6.77	0.13	2.35	4.5	4.14	5.63	0.38	100.06		56.82	0.18	26.99	0.59	0	0.2	8.22	5.27	1.41	99.68		0.985353	0.00700876	0.321695	0.0942241	0.00183253	0.0583127	0.0802425	0.133591	0.119533	0.00535449	1.80715		0.545253	0.00387836	0.178013	0.0521397	0.00101405	0.0322678	0.0444029	0.073924	0.0661445	0.00296295
Nicotra et al. (2018)		20	1008		59.2	0.56	16.4	6.77	0.13	2.35	4.5	4.14	5.63	0.38	100.06		56.45	0.23	26.76	0.71	0	0.33	8.51	5.28	1.45	99.72		0.985353	0.00700876	0.321695	0.0942241	0.00183253	0.0583127	0.0802425	0.133591	0.119533	0.00535449	1.80715		0.545253	0.00387836	0.178013	0.0521397	0.00101405	0.0322678	0.0444029	0.073924	0.0661445	0.00296295
Nicotra et al. (2018)		30	1008		59.2	0.56	16.4	6.77	0.13	2.35	4.5	4.14	5.63	0.38	100.06		56.88	0.14	27.23	0.63	0	0.11	8.52	5.3	1.18	99.99		0.985353	0.00700876	0.321695	0.0942241	0.00183253	0.0583127	0.0802425	0.133591	0.119533	0.00535449	1.80715		0.545253	0.00387836	0.178013	0.0521397	0.00101405	0.0322678	0.0444029	0.073924	0.0661445	0.00296295
Nicotra et al. (2018)		40	1008		59.2	0.56	16.4	6.77	0.13	2.35	4.5	4.14	5.63	0.38	100.06		54.11	0.13	28.7	0.76	0	0.31	10.13	4.49	1	99.63		0.985353	0.00700876	0.321695	0.0942241	0.00183253	0.0583127	0.0802425	0.133591	0.119533	0.00535449	1.80715		0.545253	0.00387836	0.178013	0.0521397	0.00101405	0.0322678	0.0444029	0.073924	0.0661445	0.00296295
Nicotra et al. (2018)		50	1008		59.2	0.56	16.4	6.77	0.13	2.35	4.5	4.14	5.63	0.38	100.06		52.08	0.26	30.08	0.74	0	0.3	11.58	3.76	0.75	99.55		0.985353	0.00700876	0.321695	0.0942241	0.00183253	0.0583127	0.0802425	0.133591	0.119533	0.00535449	1.80715		0.545253	0.00387836	0.178013	0.0521397	0.00101405	0.0322678	0.0444029	0.073924	0.0661445	0.00296295
Nicotra et al. (2018)		60	1008		59.2	0.56	16.4	6.77	0.13	2.35	4.5	4.14	5.63	0.38	100.06		53.03	0.26	29.19	0.74	0	0.32	10.72	4.3	0.86	99.42		0.985353	0.00700876	0.321695	0.0942241	0.00183253	0.0583127	0.0802425	0.133591	0.119533	0.00535449	1.80715		0.545253	0.00387836	0.178013	0.0521397	0.00101405	0.0322678	0.0444029	0.073924	0.0661445	0.00296295
Nicotra et al. (2018)		70	1008		59.2	0.56	16.4	6.77	0.13	2.35	4.5	4.14	5.63	0.38	100.06		54.76	0.23	28.43	0.54	0	0.12	9.79	4.73	0.98	99.58		0.985353	0.00700876	0.321695	0.0942241	0.00183253	0.0583127	0.0802425	0.133591	0.119533	0.00535449	1.80715		0.545253	0.00387836	0.178013	0.0521397	0.00101405	0.0322678	0.0444029	0.073924	0.0661445	0.00296295
Nicotra et al. (2018)		80	1008		59.2	0.56	16.4	6.77	0.13	2.35	4.5	4.14	5.63	0.38	100.06		54.09	0.26	28.78	0.83	0	0.17	10.11	4.38	0.91	99.53		0.985353	0.00700876	0.321695	0.0942241	0.00183253	0.0583127	0.0802425	0.133591	0.119533	0.00535449	1.80715		0.545253	0.00387836	0.178013	0.0521397	0.00101405	0.0322678	0.0444029	0.073924	0.0661445	0.00296295
Nicotra et al. (2018)		90	1008		59.2	0.56	16.4	6.77	0.13	2.35	4.5	4.14	5.63	0.38	100.06		54.77	0.25	28.46	0.58	0	0.23	10.14	4.36	0.95	99.74		0.985353	0.00700876	0.321695	0.0942241	0.00183253	0.0583127	0.0802425	0.133591	0.119533	0.00535449	1.80715		0.545253	0.00387836	0.178013	0.0521397	0.00101405	0.0322678	0.0444029	0.073924	0.0661445	0.00296295
Nicotra et al. (2018)		100	1008		59.2	0.56	16.4	6.77	0.13	2.35	4.5	4.14	5.63	0.38	100.06		54.83	0.29	28.12	0.8	0	0.04	9.81	4.77	1.07	99.73		0.985353	0.00700876	0.321695	0.0942241	0.00183253	0.0583127	0.0802425	0.133591	0.119533	0.00535449	1.80715		0.545253	0.00387836	0.178013	0.0521397	0.00101405	0.0322678	0.0444029	0.073924	0.0661445	0.00296295
Nicotra et al. (2018)		110	1008		59.2	0.56	16.4	6.77	0.13	2.35	4.5	4.14	5.63	0.38	100.06		53.76	0.3	29.03	0.68	0	0.17	10.4	4.46	0.87	99.67		0.985353	0.00700876	0.321695	0.0942241	0.00183253	0.0583127	0.0802425	0.133591	0.119533	0.00535449	1.80715		0.545253	0.00387836	0.178013	0.0521397	0.00101405	0.0322678	0.0444029	0.073924	0.0661445	0.00296295
Nicotra et al. (2018)		120	1008		59.2	0.56	16.4	6.77	0.13	2.35	4.5	4.14	5.63	0.38	100.06		52.01	0.3	30.83	0.71	0	0.36	10.93	3.85	0.88	99.87		0.985353	0.00700876	0.321695	0.0942241	0.00183253	0.0583127	0.0802425	0.133591	0.119533	0.00535449	1.80715		0.545253	0.00387836	0.178013	0.0521397	0.00101405	0.0322678	0.0444029	0.073924	0.0661445	0.00296295
Nicotra et al. (2018)		130	1008		59.2	0.56	16.4	6.77	0.13	2.35	4.5	4.14	5.63	0.38	100.06		54.75	0.17	28.51	0.72	0	0.21	10.18	4.33	0.96	99.83		0.985353	0.00700876	0.321695	0.0942241	0.00183253	0.0583127	0.0802425	0.133591	0.119533	0.00535449	1.80715		0.545253	0.00387836	0.178013	0.0521397	0.00101405	0.0322678	0.0444029	0.073924	0.0661445	0.00296295
Nicotra et al. (2018)		140	1008		59.2	0.56	16.4	6.77	0.13	2.35	4.5	4.14	5.63	0.38	100.06		53.29	0.19	29.49	0.73	0	0.23	10.87	4.15	0.78	99.73		0.985353	0.00700876	0.321695	0.0942241	0.00183253	0.0583127	0.0802425	0.133591	0.119533	0.00535449	1.80715		0.545253	0.00387836	0.178013	0.0521397	0.00101405	0.0322678	0.0444029	0.073924	0.0661445	0.00296295
Nicotra et al. (2018)		150	1008		59.2	0.56	16.4	6.77	0.13	2.35	4.5	4.14	5.63	0.38	100.06		53.71	0.08	29.19	0.73	0	0.16	10.89	4.24	0.75	99.75		0.985353	0.00700876	0.321695	0.0942241	0.00183253	0.0583127	0.0802425	0.133591	0.119533	0.00535449	1.80715		0.545253	0.00387836	0.178013	0.0521397	0.00101405	0.0322678	0.0444029	0.073924	0.0661445	0.00296295
Nicotra et al. (2018)		160	1008		59.2	0.56	16.4	6.77	0.13	2.35	4.5	4.14	5.63	0.38	100.06		53.64	0.27	29.03	0.83	0	0.22	10.53	4.23	0.86	99.61		0.985353	0.00700876	0.321695	0.0942241	0.00183253	0.0583127	0.0802425	0.133591	0.119533	0.00535449	1.80715		0.545253	0.00387836	0.178013	0.0521397	0.00101405	0.0322678	0.0444029	0.073924	0.0661445	0.00296295
Nicotra et al. (2018)		170	1008		59.2	0.56	16.4	6.77	0.13	2.35	4.5	4.14	5.63	0.38	100.06		53.22	0.2	29.49	0.74	0	0.32	10.82	4.06	0.79	99.64		0.985353	0.00700876	0.321695	0.0942241	0.00183253	0.0583127	0.0802425	0.133591	0.119533	0.00535449	1.80715		0.545253	0.00387836	0.178013	0.0521397	0.00101405	0.0322678	0.0444029	0.073924	0.0661445	0.00296295
Nicotra et al. (2018)		180	1008		59.2	0.56	16.4	6.77	0.13	2.35	4.5	4.14	5.63	0.38	100.06		53.99	0.18	28.89	0.81	0	0.14	10.29	4.39	0.99	99.68		0.985353	0.00700876	0.321695	0.0942241	0.00183253	0.0583127	0.0802425	0.133591	0.119533	0.00535449	1.80715		0.545253	0.00387836	0.178013	0.0521397	0.00101405	0.0322678	0.0444029	0.073924	0.0661445	0.00296295
Nicotra et al. (2018)		190	1008		59.2	0.56	16.4	6.77	0.13	2.35	4.5	4.14	5.63	0.38	100.06		54.63	0.08	28.93	0.5	0	0.11	10.31	4.44	0.87	99.87		0.985353	0.00700876	0.321695	0.0942241	0.00183253	0.0583127	0.0802425	0.133591	0.119533	0.00535449	1.80715		0.545253	0.00387836	0.178013	0.0521397	0.00101405	0.0322678	0.0444029	0.073924	0.0661445	0.00296295
Nicotra et al. (2018)		200	1008		59.2	0.56	16.4	6.77	0.13	2.35	4.5	4.14	5.63	0.38	100.06		53.31	0.28	29.02	0.79	0	0.38	10.69	4.34	0.86	99.67		0.985353	0.00700876	0.321695	0.0942241	0.00183253	0.0583127	0.0802425	0.133591	0.119533	0.00535449	1.80715		0.545253	0.00387836	0.178013	0.0521397	0.00101405	0.0322678	0.0444029	0.073924	0.0661445	0.00296295
Nicotra et al. (2018)		210	1008		59.2	0.56	16.4	6.77	0.13	2.35	4.5	4.14	5.63	0.38	100.06		54.15	0.15	28.81	0.68	0	0.16	10.34	4.56	0.93	99.78		0.985353	0.00700876	0.321695	0.0942241	0.00183253	0.0583127	0.0802425	0.133591	0.119533	0.00535449	1.80715		0.545253	0.00387836	0.178013	0.0521397	0.00101405	0.0322678	0.0444029	0.073924	0.0661445	0.00296295
Nicotra et al. (2018)		220	1008		59.2	0.56	16.4	6.77	0.13	2.35	4.5	4.14	5.63	0.38	100.06		53.52	0.28	29	0.62	0	0.17	10.85	4.22	0.95	99.61		0.985353	0.00700876	0.321695	0.0942241	0.00183253	0.0583127	0.0802425	0.133591	0.119533	0.00535449	1.80715		0.545253	0.00387836	0.178013	0.0521397	0.00101405	0.0322678	0.0444029	0.073924	0.0661445	0.00296295
Nicotra et al. (2018)		230	1008		59.2	0.56	16.4	6.77	0.13	2.35	4.5	4.14	5.63	0.38	100.06		53.56	0.21	29.06	0.76	0	0.18	10.44	4.48	0.74	99.43		0.985353	0.00700876	0.321695	0.0942241	0.00183253	0.0583127	0.0802425	0.133591	0.119533	0.00535449	1.80715		0.545253	0.00387836	0.178013	0.0521397	0.00101405	0.0322678	0.0444029	0.073924	0.0661445	0.00296295
Nicotra et al. (2018)		240	1008		59.2	0.56	16.4	6.77	0.13	2.35	4.5	4.14	5.63	0.38	100.06		54.08	0.23	28.5	0.74	0	0.26	10.6	4.21	0.9	99.52		0.985353	0.00700876	0.321695	0.0942241	0.00183253	0.0583127	0.0802425	0.133591	0.119533	0.00535449	1.80715		0.545253	0.00387836	0.178013	0.0521397	0.00101405	0.0322678	0.0444029	0.073924	0.0661445	0.00296295
Nicotra et al. (2018)		250	1008		59.2	0.56	16.4	6.77	0.13	2.35	4.5	4.14	5.63	0.38	100.06		54.25	0.19	29.18	0.62	0	0.12	10.35	4.23	0.82	99.76		0.985353	0.00700876	0.321695	0.0942241	0.00183253	0.0583127	0.0802425	0.133591	0.119533	0.00535449	1.80715		0.545253	0.00387836	0.178013	0.0521397	0.00101405	0.0322678	0.0444029	0.073924	0.0661445	0.00296295
Nicotra et al. (2018)		260	1008		59.2	0.56	16.4	6.77	0.13	2.35	4.5	4.14	5.63	0.38	100.06		53.05	0.18	29.46	0.82	0	0.17	11.07	4.12	0.82	99.69		0.985353	0.00700876	0.321695	0.0942241	0.00183253	0.0583127	0.0802425	0.133591	0.119533	0.00535449	1.80715		0.545253	0.00387836	0.178013	0.0521397	0.00101405	0.0322678	0.0444029	0.073924	0.0661445	0.00296295
Nicotra et al. (2018)		270	1008		59.2	0.56	16.4	6.77	0.13	2.35	4.5	4.14	5.63	0.38	100.06		53.77	0.19	29.32	0.64	0	0.08	10.76	4.02	0.84	99.62		0.985353	0.00700876	0.321695	0.0942241	0.00183253	0.0583127	0.0802425	0.133591	0.119533	0.00535449	1.80715		0.545253	0.00387836	0.178013	0.0521397	0.00101405	0.0322678	0.0444029	0.073924	0.0661445	0.00296295
Nicotra et al. (2018)		280	1008		59.2	0.56	16.4	6.77	0.13	2.35	4.5	4.14	5.63	0.38	100.06		53	0.11	29.74	0.84	0	0.17	11.19	4.03	0.66	99.74		0.985353	0.00700876	0.321695	0.0942241	0.00183253	0.0583127	0.0802425	0.133591	0.119533	0.00535449	1.80715		0.545253	0.00387836	0.178013	0.0521397	0.00101405	0.0322678	0.0444029	0.073924	0.0661445	0.00296295
Nicotra et al. (2018)		290	1008		59.2	0.56	16.4	6.77	0.13	2.35	4.5	4.14	5.63	0.38	100.06		54.61	0.28	28.44	0.76	0	0.29	9.91	4.5	0.92	99.71		0.985353	0.00700876	0.321695	0.0942241	0.00183253	0.0583127	0.0802425	0.133591	0.119533	0.00535449	1.80715		0.545253	0.00387836	0.178013	0.0521397	0.00101405	0.0322678	0.0444029	0.073924	0.0661445	0.00296295
Nicotra et al. (2018)		300	1008		59.2	0.56	16.4	6.77	0.13	2.35	4.5	4.14	5.63	0.38	100.06		53.2	0.23	29.17	0.68	0	0.27	10.74	4.37	0.92	99.58		0.985353	0.00700876	0.321695	0.0942241	0.00183253	0.0583127	0.0802425	0.133591	0.119533	0.00535449	1.80715		0.545253	0.00387836	0.178013	0.0521397	0.00101405	0.0322678	0.0444029	0.073924	0.0661445	0.00296295
Nicotra et al. (2018)		310	1008		59.2	0.56	16.4	6.77	0.13	2.35	4.5	4.14	5.63	0.38	100.06		53.51	0.19	29.47	0.57	0	0.36	10.51	4.29	0.77	99.67		0.985353	0.00700876	0.321695	0.0942241	0.00183253	0.0583127	0.0802425	0.133591	0.119533	0.00535449	1.80715		0.545253	0.00387836	0.178013	0.0521397	0.00101405	0.0322678	0.0444029	0.073924	0.0661445	0.00296295
Nicotra et al. (2018)		320	1008		59.2	0.56	16.4	6.77	0.13	2.35	4.5	4.14	5.63	0.38	100.06		54.41	0.08	28.77	0.56	0	0.31	10.22	4.52	0.96	99.83		0.985353	0.00700876	0.321695	0.0942241	0.00183253	0.0583127	0.0802425	0.133591	0.119533	0.00535449	1.80715		0.545253	0.00387836	0.178013	0.0521397	0.00101405	0.0322678	0.0444029	0.073924	0.0661445	0.00296295
Nicotra et al. (2018)		330	1008		59.2	0.56	16.4	6.77	0.13	2.35	4.5	4.14	5.63	0.38	100.06		54.54	0.12	28.89	0.63	0	0.14	10.18	4.34	0.92	99.76		0.985353	0.00700876	0.321695	0.0942241	0.00183253	0.0583127	0.0802425	0.133591	0.119533	0.00535449	1.80715		0.545253	0.00387836	0.178013	0.0521397	0.00101405	0.0322678	0.0444029	0.073924	0.0661445	0.00296295
Nicotra et al. (2018)		340	1008		59.2	0.56	16.4	6.77	0.13	2.35	4.5	4.14	5.63	0.38	100.06		53.81	0.19	29.02	0.68	0	0.27	10.48	4.26	0.89	99.6		0.985353	0.00700876	0.321695	0.0942241	0.00183253	0.0583127	0.0802425	0.133591	0.119533	0.00535449	1.80715		0.545253	0.00387836	0.178013	0.0521397	0.00101405	0.0322678	0.0444029	0.073924	0.0661445	0.00296295
Nicotra et al. (2018)		350	1008		59.2	0.56	16.4	6.77	0.13	2.35	4.5	4.14	5.63	0.38	100.06		53.24	0.13	30.02	0.76	0	0.13	11.25	3.7	0.63	99.86		0.985353	0.00700876	0.321695	0.0942241	0.00183253	0.0583127	0.0802425	0.133591	0.119533	0.00535449	1.80715		0.545253	0.00387836	0.178013	0.0521397	0.00101405	0.0322678	0.0444029	0.073924	0.0661445	0.00296295
Nicotra et al. (2018)		360	1008		59.2	0.56	16.4	6.77	0.13	2.35	4.5	4.14	5.63	0.38	100.06		53.23	0.19	29.16	0.63	0	0.38	10.94	4.24	0.82	99.59		0.985353	0.00700876	0.321695	0.0942241	0.00183253	0.0583127	0.0802425	0.133591	0.119533	0.00535449	1.80715		0.545253	0.00387836	0.178013	0.0521397	0.00101405	0.0322678	0.0444029	0.073924	0.0661445	0.00296295
Nicotra et al. (2018)		370	1008		59.2	0.56	16.4	6.77	0.13	2.35	4.5	4.14	5.63	0.38	100.06		53.27	0.24	29.33	0.74	0	0.18	11.04	4.07	0.84	99.71		0.985353	0.00700876	0.321695	0.0942241	0.00183253	0.0583127	0.0802425	0.133591	0.119533	0.00535449	1.80715		0.545253	0.00387836	0.178013	0.0521397	0.00101405	0.0322678	0.0444029	0.073924	0.0661445	0.00296295
Nicotra et al. (2018)		380	1008		59.2	0.56	16.4	6.77	0.13	2.35	4.5	4.14	5.63	0.38	100.06		53.47	0.22	29.04	0.66	0	0.28	11.38	3.94	0.9	99.89		0.985353	0.00700876	0.321695	0.0942241	0.00183253	0.0583127	0.0802425	0.133591	0.119533	0.00535449	1.80715		0.545253	0.00387836	0.178013	0.0521397	0.00101405	0.0322678	0.0444029	0.073924	0.0661445	0.00296295
Nicotra et al. (2018)		390	1008		59.2	0.56	16.4	6.77	0.13	2.35	4.5	4.14	5.63	0.38	100.06		53.6	0.21	28.98	0.81	0	0.16	11.09	4.04	0.93	99.82		0.985353	0.00700876	0.321695	0.0942241	0.00183253	0.0583127	0.0802425	0.133591	0.119533	0.00535449	1.80715		0.545253	0.00387836	0.178013	0.0521397	0.00101405	0.0322678	0.0444029	0.073924	0.0661445	0.00296295
Nicotra et al. (2018)		400	1008		59.2	0.56	16.4	6.77	0.13	2.35	4.5	4.14	5.63	0.38	100.06		54.31	0.13	28.66	0.78	0	0.29	9.98	4.65	0.93	99.73		0.985353	0.00700876	0.321695	0.0942241	0.00183253	0.0583127	0.0802425	0.133591	0.119533	0.00535449	1.80715		0.545253	0.00387836	0.178013	0.0521397	0.00101405	0.0322678	0.0444029	0.073924	0.0661445	0.00296295
Nicotra et al. (2018)		410	1008		59.2	0.56	16.4	6.77	0.13	2.35	4.5	4.14	5.63	0.38	100.06		54.32	0.4	28.69	0.73	0	0	10.18	4.53	0.66	99.51		0.985353	0.00700876	0.321695	0.0942241	0.00183253	0.0583127	0.0802425	0.133591	0.119533	0.00535449	1.80715		0.545253	0.00387836	0.178013	0.0521397	0.00101405	0.0322678	0.0444029	0.073924	0.0661445	0.00296295
Nicotra et al. (2018)		420	1008		59.2	0.56	16.4	6.77	0.13	2.35	4.5	4.14	5.63	0.38	100.06		53.88	0.28	28.54	0.77	0	0.34	10.62	4.08	1.03	99.54		0.985353	0.00700876	0.321695	0.0942241	0.00183253	0.0583127	0.0802425	0.133591	0.119533	0.00535449	1.80715		0.545253	0.00387836	0.178013	0.0521397	0.00101405	0.0322678	0.0444029	0.073924	0.0661445	0.00296295
Nicotra et al. (2018)		430	1008		59.2	0.56	16.4	6.77	0.13	2.35	4.5	4.14	5.63	0.38	100.06		54.19	0.26	28.76	0.75	0	0.11	10.32	4.39	0.92	99.7		0.985353	0.00700876	0.321695	0.0942241	0.00183253	0.0583127	0.0802425	0.133591	0.119533	0.00535449	1.80715		0.545253	0.00387836	0.178013	0.0521397	0.00101405	0.0322678	0.0444029	0.073924	0.0661445	0.00296295
Nicotra et al. (2018)		440	1008		59.2	0.56	16.4	6.77	0.13	2.35	4.5	4.14	5.63	0.38	100.06		54.78	0.14	28.66	0.68	0	0.33	9.39	4.79	0.99	99.76		0.985353	0.00700876	0.321695	0.0942241	0.00183253	0.0583127	0.0802425	0.133591	0.119533	0.00535449	1.80715		0.545253	0.00387836	0.178013	0.0521397	0.00101405	0.0322678	0.0444029	0.073924	0.0661445	0.00296295
Nicotra et al. (2018)		450	1008		59.2	0.56	16.4	6.77	0.13	2.35	4.5	4.14	5.63	0.38	100.06		54.28	0.29	28.22	0.85	0	0.26	10.35	4.34	1.02	99.61		0.985353	0.00700876	0.321695	0.0942241	0.00183253	0.0583127	0.0802425	0.133591	0.119533	0.00535449	1.80715		0.545253	0.00387836	0.178013	0.0521397	0.00101405	0.0322678	0.0444029	0.073924	0.0661445	0.00296295
Nicotra et al. (2018)		460	1008		59.2	0.56	16.4	6.77	0.13	2.35	4.5	4.14	5.63	0.38	100.06		55.45	0.07	28.05	0.69	0	0.28	9.76	4.47	1.09	99.86		0.985353	0.00700876	0.321695	0.0942241	0.00183253	0.0583127	0.0802425	0.133591	0.119533	0.00535449	1.80715		0.545253	0.00387836	0.178013	0.0521397	0.00101405	0.0322678	0.0444029	0.073924	0.0661445	0.00296295
Nicotra et al. (2018)		470	1008		59.2	0.56	16.4	6.77	0.13	2.35	4.5	4.14	5.63	0.38	100.06		54.78	0	28.71	0.68	0	0.19	9.92	4.58	0.93	99.79		0.985353	0.00700876	0.321695	0.0942241	0.00183253	0.0583127	0.0802425	0.133591	0.119533	0.00535449	1.80715		0.545253	0.00387836	0.178013	0.0521397	0.00101405	0.0322678	0.0444029	0.073924	0.0661445	0.00296295
Nicotra et al. (2018)		480	1008		59.2	0.56	16.4	6.77	0.13	2.35	4.5	4.14	5.63	0.38	100.06		54.38	0.1	28.67	0.68	0	0.16	10.48	4.1	1.07	99.64		0.985353	0.00700876	0.321695	0.0942241	0.00183253	0.0583127	0.0802425	0.133591	0.119533	0.00535449	1.80715		0.545253	0.00387836	0.178013	0.0521397	0.00101405	0.0322678	0.0444029	0.073924	0.0661445	0.00296295
Nicotra et al. (2018)		490	1008		59.2	0.56	16.4	6.77	0.13	2.35	4.5	4.14	5.63	0.38	100.06		55	0.05	28.34	0.68	0	0.26	9.82	4.62	1.01	99.78		0.985353	0.00700876	0.321695	0.0942241	0.00183253	0.0583127	0.0802425	0.133591	0.119533	0.00535449	1.80715		0.545253	0.00387836	0.178013	0.0521397	0.00101405	0.0322678	0.0444029	0.073924	0.0661445	0.00296295
Nicotra et al. (2018)		500	1008		59.2	0.56	16.4	6.77	0.13	2.35	4.5	4.14	5.63	0.38	100.06		54.75	0.18	28.15	0.73	0	0.4	9.65	4.73	1.04	99.63		0.985353	0.00700876	0.321695	0.0942241	0.00183253	0.0583127	0.0802425	0.133591	0.119533	0.00535449	1.80715		0.545253	0.00387836	0.178013	0.0521397	0.00101405	0.0322678	0.0444029	0.073924	0.0661445	0.00296295
Nicotra et al. (2018)		510	1008		59.2	0.56	16.4	6.77	0.13	2.35	4.5	4.14	5.63	0.38	100.06		55.95	0.33	27.59	0.72	0	0.12	9.69	4.23	1.13	99.76		0.985353	0.00700876	0.321695	0.0942241	0.00183253	0.0583127	0.0802425	0.133591	0.119533	0.00535449	1.80715		0.545253	0.00387836	0.178013	0.0521397	0.00101405	0.0322678	0.0444029	0.073924	0.0661445	0.00296295
Nicotra et al. (2018)		520	1008		59.2	0.56	16.4	6.77	0.13	2.35	4.5	4.14	5.63	0.38	100.06		55.1	0.18	28.14	0.7	0	0.35	9.56	4.64	1.06	99.73		0.985353	0.00700876	0.321695	0.0942241	0.00183253	0.0583127	0.0802425	0.133591	0.119533	0.00535449	1.80715		0.545253	0.00387836	0.178013	0.0521397	0.00101405	0.0322678	0.0444029	0.073924	0.0661445	0.00296295
Nicotra et al. (2018)		530	1008		59.2	0.56	16.4	6.77	0.13	2.35	4.5	4.14	5.63	0.38	100.06		54.76	0.3	28.22	0.67	0	0.34	9.43	4.78	1.19	99.69		0.985353	0.00700876	0.321695	0.0942241	0.00183253	0.0583127	0.0802425	0.133591	0.119533	0.00535449	1.80715		0.545253	0.00387836	0.178013	0.0521397	0.00101405	0.0322678	0.0444029	0.073924	0.0661445	0.00296295
Nicotra et al. (2018)		540	1008		59.2	0.56	16.4	6.77	0.13	2.35	4.5	4.14	5.63	0.38	100.06		55	0.23	28.27	0.76	0	0.09	9.59	4.79	1.09	99.82		0.985353	0.00700876	0.321695	0.0942241	0.00183253	0.0583127	0.0802425	0.133591	0.119533	0.00535449	1.80715		0.545253	0.00387836	0.178013	0.0521397	0.00101405	0.0322678	0.0444029	0.073924	0.0661445	0.00296295
Nicotra et al. (2018)		550	1008		59.2	0.56	16.4	6.77	0.13	2.35	4.5	4.14	5.63	0.38	100.06		54.73	0.22	28.41	0.76	0	0.31	9.68	4.63	0.98	99.72		0.985353	0.00700876	0.321695	0.0942241	0.00183253	0.0583127	0.0802425	0.133591	0.119533	0.00535449	1.80715		0.545253	0.00387836	0.178013	0.0521397	0.00101405	0.0322678	0.0444029	0.073924	0.0661445	0.00296295
Nicotra et al. (2018)		560	1008		59.2	0.56	16.4	6.77	0.13	2.35	4.5	4.14	5.63	0.38	100.06		55.38	0.13	27.75	0.81	0	0.25	9.99	4.21	1.2	99.72		0.985353	0.00700876	0.321695	0.0942241	0.00183253	0.0583127	0.0802425	0.133591	0.119533	0.00535449	1.80715		0.545253	0.00387836	0.178013	0.0521397	0.00101405	0.0322678	0.0444029	0.073924	0.0661445	0.00296295
Nicotra et al. (2018)		570	1008		59.2	0.56	16.4	6.77	0.13	2.35	4.5	4.14	5.63	0.38	100.06		56.2	0.25	27.21	0.64	0	0.26	8.61	5.13	1.37	99.67		0.985353	0.00700876	0.321695	0.0942241	0.00183253	0.0583127	0.0802425	0.133591	0.119533	0.00535449	1.80715		0.545253	0.00387836	0.178013	0.0521397	0.00101405	0.0322678	0.0444029	0.073924	0.0661445	0.00296295
Nicotra et al. (2018)		580	1008		59.2	0.56	16.4	6.77	0.13	2.35	4.5	4.14	5.63	0.38	100.06		57.15	0.14	26.84	0.55	0	0.23	7.68	5.7	1.47	99.76		0.985353	0.00700876	0.321695	0.0942241	0.00183253	0.0583127	0.0802425	0.133591	0.119533	0.00535449	1.80715		0.545253	0.00387836	0.178013	0.0521397	0.00101405	0.0322678	0.0444029	0.073924	0.0661445	0.00296295
Nicotra et al. (2018)		590	1008		59.2	0.56	16.4	6.77	0.13	2.35	4.5	4.14	5.63	0.38	100.06		57.73	0.14	26.73	0.54	0	0.07	7.95	5.26	1.5	99.92		0.985353	0.00700876	0.321695	0.0942241	0.00183253	0.0583127	0.0802425	0.133591	0.119533	0.00535449	1.80715		0.545253	0.00387836	0.178013	0.0521397	0.00101405	0.0322678	0.0444029	0.073924	0.0661445	0.00296295
Nicotra et al. (2018)		600	1008		59.2	0.56	16.4	6.77	0.13	2.35	4.5	4.14	5.63	0.38	100.06		55.85	0.29	27.68	0.66	0	0.25	9.19	4.67	1.31	99.9		0.985353	0.00700876	0.321695	0.0942241	0.00183253	0.0583127	0.0802425	0.133591	0.119533	0.00535449	1.80715		0.545253	0.00387836	0.178013	0.0521397	0.00101405	0.0322678	0.0444029	0.073924	0.0661445	0.00296295
Nicotra et al. (2018)		610	1008		59.2	0.56	16.4	6.77	0.13	2.35	4.5	4.14	5.63	0.38	100.06		56.27	0.2	27.21	0.7	0	0.1	8.59	5.29	1.45	99.81		0.985353	0.00700876	0.321695	0.0942241	0.00183253	0.0583127	0.0802425	0.133591	0.119533	0.00535449	1.80715		0.545253	0.00387836	0.178013	0.0521397	0.00101405	0.0322678	0.0444029	0.073924	0.0661445	0.00296295
Nicotra et al. (2018)		620	1008		59.2	0.56	16.4	6.77	0.13	2.35	4.5	4.14	5.63	0.38	100.06		56.37	0.19	27.01	0.67	0	0.2	8.5	5.28	1.49	99.71		0.985353	0.00700876	0.321695	0.0942241	0.00183253	0.0583127	0.0802425	0.133591	0.119533	0.00535449	1.80715		0.545253	0.00387836	0.178013	0.0521397	0.00101405	0.0322678	0.0444029	0.073924	0.0661445	0.00296295
Nicotra et al. (2018)		630	1008		59.2	0.56	16.4	6.77	0.13	2.35	4.5	4.14	5.63	0.38	100.06		55.34	0.13	28.25	0.5	0	0.16	9.66	4.59	1.12	99.75		0.985353	0.00700876	0.321695	0.0942241	0.00183253	0.0583127	0.0802425	0.133591	0.119533	0.00535449	1.80715		0.545253	0.00387836	0.178013	0.0521397	0.00101405	0.0322678	0.0444029	0.073924	0.0661445	0.00296295
Nicotra et al. (2018)		640	1008		59.2	0.56	16.4	6.77	0.13	2.35	4.5	4.14	5.63	0.38	100.06		55.49	0.23	28.07	0.61	0	0.33	9.26	4.59	1.11	99.69		0.985353	0.00700876	0.321695	0.0942241	0.00183253	0.0583127	0.0802425	0.133591	0.119533	0.00535449	1.80715		0.545253	0.00387836	0.178013	0.0521397	0.00101405	0.0322678	0.0444029	0.073924	0.0661445	0.00296295
Nicotra et al. (2018)		650	1008		59.2	0.56	16.4	6.77	0.13	2.35	4.5	4.14	5.63	0.38	100.06		55.12	0.18	27.86	0.76	0	0.36	9.44	5.01	1.03	99.76		0.985353	0.00700876	0.321695	0.0942241	0.00183253	0.0583127	0.0802425	0.133591	0.119533	0.00535449	1.80715		0.545253	0.00387836	0.178013	0.0521397	0.00101405	0.0322678	0.0444029	0.073924	0.0661445	0.00296295
Nicotra et al. (2018)		660	1008		59.2	0.56	16.4	6.77	0.13	2.35	4.5	4.14	5.63	0.38	100.06		55.35	0.25	27.64	0.71	0	0.24	9.47	4.83	1.14	99.63		0.985353	0.00700876	0.321695	0.0942241	0.00183253	0.0583127	0.0802425	0.133591	0.119533	0.00535449	1.80715		0.545253	0.00387836	0.178013	0.0521397	0.00101405	0.0322678	0.0444029	0.073924	0.0661445	0.00296295
Nicotra et al. (2018)		670	1008		59.2	0.56	16.4	6.77	0.13	2.35	4.5	4.14	5.63	0.38	100.06		56.11	0.31	27.13	0.76	0	0.17	8.78	5.03	1.34	99.63		0.985353	0.00700876	0.321695	0.0942241	0.00183253	0.0583127	0.0802425	0.133591	0.119533	0.00535449	1.80715		0.545253	0.00387836	0.178013	0.0521397	0.00101405	0.0322678	0.0444029	0.073924	0.0661445	0.00296295
Nicotra et al. (2018)		680	1008		59.2	0.56	16.4	6.77	0.13	2.35	4.5	4.14	5.63	0.38	100.06		55.83	0.27	26.95	0.84	0	0.27	8.47	5.8	0.94	99.37		0.985353	0.00700876	0.321695	0.0942241	0.00183253	0.0583127	0.0802425	0.133591	0.119533	0.00535449	1.80715		0.545253	0.00387836	0.178013	0.0521397	0.00101405	0.0322678	0.0444029	0.073924	0.0661445	0.00296295
Nicotra et al. (2018)		690	1008		59.2	0.56	16.4	6.77	0.13	2.35	4.5	4.14	5.63	0.38	100.06		55.95	0.24	27.17	0.7	0	0.27	9.04	5.02	1.13	99.52		0.985353	0.00700876	0.321695	0.0942241	0.00183253	0.0583127	0.0802425	0.133591	0.119533	0.00535449	1.80715		0.545253	0.00387836	0.178013	0.0521397	0.00101405	0.0322678	0.0444029	0.073924	0.0661445	0.00296295
Nicotra et al. (2018)		700	1008		59.2	0.56	16.4	6.77	0.13	2.35	4.5	4.14	5.63	0.38	100.06		55.27	0.21	27.84	0.71	0	0.23	9.16	5.08	1.23	99.73		0.985353	0.00700876	0.321695	0.0942241	0.00183253	0.0583127	0.0802425	0.133591	0.119533	0.00535449	1.80715		0.545253	0.00387836	0.178013	0.0521397	0.00101405	0.0322678	0.0444029	0.073924	0.0661445	0.00296295
Nicotra et al. (2018)		710	1008		59.2	0.56	16.4	6.77	0.13	2.35	4.5	4.14	5.63	0.38	100.06		56.7	0.3	26.79	0.64	0	0.16	8.3	5.35	1.64	99.88		0.985353	0.00700876	0.321695	0.0942241	0.00183253	0.0583127	0.0802425	0.133591	0.119533	0.00535449	1.80715		0.545253	0.00387836	0.178013	0.0521397	0.00101405	0.0322678	0.0444029	0.073924	0.0661445	0.00296295
Nicotra et al. (2018)		720	1008		59.2	0.56	16.4	6.77	0.13	2.35	4.5	4.14	5.63	0.38	100.06		56.82	0.16	26.98	0.73	0	0.23	8.32	5.36	1.16	99.76		0.985353	0.00700876	0.321695	0.0942241	0.00183253	0.0583127	0.0802425	0.133591	0.119533	0.00535449	1.80715		0.545253	0.00387836	0.178013	0.0521397	0.00101405	0.0322678	0.0444029	0.073924	0.0661445	0.00296295
Nicotra et al. (2018)		730	1008		59.2	0.56	16.4	6.77	0.13	2.35	4.5	4.14	5.63	0.38	100.06		56.08	0.17	27.46	0.72	0	0.1	8.81	5.23	1.24	99.81		0.985353	0.00700876	0.321695	0.0942241	0.00183253	0.0583127	0.0802425	0.133591	0.119533	0.00535449	1.80715		0.545253	0.00387836	0.178013	0.0521397	0.00101405	0.0322678	0.0444029	0.073924	0.0661445	0.00296295
Nicotra et al. (2018)		740	1008		59.2	0.56	16.4	6.77	0.13	2.35	4.5	4.14	5.63	0.38	100.06		56.73	0.16	27.01	0.7	0	0.18	8.12	5.43	1.38	99.71		0.985353	0.00700876	0.321695	0.0942241	0.00183253	0.0583127	0.0802425	0.133591	0.119533	0.00535449	1.80715		0.545253	0.00387836	0.178013	0.0521397	0.00101405	0.0322678	0.0444029	0.073924	0.0661445	0.00296295
Nicotra et al. (2018)		750	1008		59.2	0.56	16.4	6.77	0.13	2.35	4.5	4.14	5.63	0.38	100.06		55.08	0.18	28.2	0.67	0	0.32	9.78	4.65	0.88	99.76		0.985353	0.00700876	0.321695	0.0942241	0.00183253	0.0583127	0.0802425	0.133591	0.119533	0.00535449	1.80715		0.545253	0.00387836	0.178013	0.0521397	0.00101405	0.0322678	0.0444029	0.073924	0.0661445	0.00296295
Nicotra et al. (2018)		760	1008		59.2	0.56	16.4	6.77	0.13	2.35	4.5	4.14	5.63	0.38	100.06		55.28	0.22	28.08	0.63	0	0.32	9.2	4.8	1.17	99.7		0.985353	0.00700876	0.321695	0.0942241	0.00183253	0.0583127	0.0802425	0.133591	0.119533	0.00535449	1.80715		0.545253	0.00387836	0.178013	0.0521397	0.00101405	0.0322678	0.0444029	0.073924	0.0661445	0.00296295
Nicotra et al. (2018)		770	1008		59.2	0.56	16.4	6.77	0.13	2.35	4.5	4.14	5.63	0.38	100.06		56.81	0.19	27.01	0.7	0	0.14	8.49	5.13	1.47	99.94		0.985353	0.00700876	0.321695	0.0942241	0.00183253	0.0583127	0.0802425	0.133591	0.119533	0.00535449	1.80715		0.545253	0.00387836	0.178013	0.0521397	0.00101405	0.0322678	0.0444029	0.073924	0.0661445	0.00296295
Nicotra et al. (2018)		780	1008		59.2	0.56	16.4	6.77	0.13	2.35	4.5	4.14	5.63	0.38	100.06		57.15	0.25	26.45	0.71	0	0.17	7.55	5.52	1.85	99.65		0.985353	0.00700876	0.321695	0.0942241	0.00183253	0.0583127	0.0802425	0.133591	0.119533	0.00535449	1.80715		0.545253	0.00387836	0.178013	0.0521397	0.00101405	0.0322678	0.0444029	0.073924	0.0661445	0.00296295
Nicotra et al. (2018)		790	1008		59.2	0.56	16.4	6.77	0.13	2.35	4.5	4.14	5.63	0.38	100.06		56.67	0.21	27.03	0.72	0	0.19	8.39	5.33	1.39	99.93		0.985353	0.00700876	0.321695	0.0942241	0.00183253	0.0583127	0.0802425	0.133591	0.119533	0.00535449	1.80715		0.545253	0.00387836	0.178013	0.0521397	0.00101405	0.0322678	0.0444029	0.073924	0.0661445	0.00296295
Nicotra et al. (2018)		800	1008		59.2	0.56	16.4	6.77	0.13	2.35	4.5	4.14	5.63	0.38	100.06		56.68	0.19	26.8	0.65	0	0.3	8.34	5.21	1.58	99.75		0.985353	0.00700876	0.321695	0.0942241	0.00183253	0.0583127	0.0802425	0.133591	0.119533	0.00535449	1.80715		0.545253	0.00387836	0.178013	0.0521397	0.00101405	0.0322678	0.0444029	0.073924	0.0661445	0.00296295
Nicotra et al. (2018)		810	1008		59.2	0.56	16.4	6.77	0.13	2.35	4.5	4.14	5.63	0.38	100.06		56.82	0.2	26.74	0.72	0	0.3	8.11	5.52	1.3	99.71		0.985353	0.00700876	0.321695	0.0942241	0.00183253	0.0583127	0.0802425	0.133591	0.119533	0.00535449	1.80715		0.545253	0.00387836	0.178013	0.0521397	0.00101405	0.0322678	0.0444029	0.073924	0.0661445	0.00296295
Nicotra et al. (2018)		820	1008		59.2	0.56	16.4	6.77	0.13	2.35	4.5	4.14	5.63	0.38	100.06		56.61	0.31	26.09	0.81	0	0.33	8.83	4.33	2.06	99.37		0.985353	0.00700876	0.321695	0.0942241	0.00183253	0.0583127	0.0802425	0.133591	0.119533	0.00535449	1.80715		0.545253	0.00387836	0.178013	0.0521397	0.00101405	0.0322678	0.0444029	0.073924	0.0661445	0.00296295
Nicotra et al. (2018)		830	1008		59.2	0.56	16.4	6.77	0.13	2.35	4.5	4.14	5.63	0.38	100.06		57.73	0.13	25.94	0.61	0	0.31	7.35	5.79	1.87	99.73		0.985353	0.00700876	0.321695	0.0942241	0.00183253	0.0583127	0.0802425	0.133591	0.119533	0.00535449	1.80715		0.545253	0.00387836	0.178013	0.0521397	0.00101405	0.0322678	0.0444029	0.073924	0.0661445	0.00296295
Nicotra et al. (2018)		840	1008		59.2	0.56	16.4	6.77	0.13	2.35	4.5	4.14	5.63	0.38	100.06		57.72	0.17	25.89	0.66	0	0.21	7.78	5.31	1.85	99.59		0.985353	0.00700876	0.321695	0.0942241	0.00183253	0.0583127	0.0802425	0.133591	0.119533	0.00535449	1.80715		0.545253	0.00387836	0.178013	0.0521397	0.00101405	0.0322678	0.0444029	0.073924	0.0661445	0.00296295
Nicotra et al. (2018)		850	1008		59.2	0.56	16.4	6.77	0.13	2.35	4.5	4.14	5.63	0.38	100.06		57.82	0.18	26.07	0.66	0	0.23	7.16	5.94	1.54	99.6		0.985353	0.00700876	0.321695	0.0942241	0.00183253	0.0583127	0.0802425	0.133591	0.119533	0.00535449	1.80715		0.545253	0.00387836	0.178013	0.0521397	0.00101405	0.0322678	0.0444029	0.073924	0.0661445	0.00296295
Nicotra et al. (2018)		860	1008		59.2	0.56	16.4	6.77	0.13	2.35	4.5	4.14	5.63	0.38	100.06		56.96	0.22	26.74	0.73	0	0.27	8.44	4.95	1.5	99.81		0.985353	0.00700876	0.321695	0.0942241	0.00183253	0.0583127	0.0802425	0.133591	0.119533	0.00535449	1.80715		0.545253	0.00387836	0.178013	0.0521397	0.00101405	0.0322678	0.0444029	0.073924	0.0661445	0.00296295
Nicotra et al. (2018)		870	1008		59.2	0.56	16.4	6.77	0.13	2.35	4.5	4.14	5.63	0.38	100.06		56.68	0.14	26.91	0.77	0	0.27	8.27	5.35	1.46	99.85		0.985353	0.00700876	0.321695	0.0942241	0.00183253	0.0583127	0.0802425	0.133591	0.119533	0.00535449	1.80715		0.545253	0.00387836	0.178013	0.0521397	0.00101405	0.0322678	0.0444029	0.073924	0.0661445	0.00296295
Nicotra et al. (2018)		880	1008		59.2	0.56	16.4	6.77	0.13	2.35	4.5	4.14	5.63	0.38	100.06		56.45	0.15	26.99	0.68	0	0.3	8.39	5.41	1.44	99.81		0.985353	0.00700876	0.321695	0.0942241	0.00183253	0.0583127	0.0802425	0.133591	0.119533	0.00535449	1.80715		0.545253	0.00387836	0.178013	0.0521397	0.00101405	0.0322678	0.0444029	0.073924	0.0661445	0.00296295
Punte Nere Latite - VL315 Plag1		profile	1025
Nicotra et al. (2018)		0	1025		58.2	0.67	17.8	6.98	0.15	2.15	4.2	3.55	5.84	0.43	99.97		54.9	0.12	28.17	0.74	0.07	0.24	10.82	3.96	0.99	100.01		0.968708	0.00838548	0.349157	0.0971468	0.00211446	0.0533499	0.074893	0.114553	0.123992	0.00605903	1.79836		0.538663	0.00466285	0.194153	0.0540197	0.00117577	0.0296659	0.0416452	0.0636987	0.0689471	0.0033692
Nicotra et al. (2018)		7	1025		58.2	0.67	17.8	6.98	0.15	2.15	4.2	3.55	5.84	0.43	99.97		53.94	0.33	28.25	0.86	0.14	0.21	11.29	4.01	0.96	99.99		0.968708	0.00838548	0.349157	0.0971468	0.00211446	0.0533499	0.074893	0.114553	0.123992	0.00605903	1.79836		0.538663	0.00466285	0.194153	0.0540197	0.00117577	0.0296659	0.0416452	0.0636987	0.0689471	0.0033692
Nicotra et al. (2018)		14	1025		58.2	0.67	17.8	6.98	0.15	2.15	4.2	3.55	5.84	0.43	99.97		53.95	0.22	28.55	0.84	0.26	0.22	10.96	4.1	0.9	100		0.968708	0.00838548	0.349157	0.0971468	0.00211446	0.0533499	0.074893	0.114553	0.123992	0.00605903	1.79836		0.538663	0.00466285	0.194153	0.0540197	0.00117577	0.0296659	0.0416452	0.0636987	0.0689471	0.0033692
Nicotra et al. (2018)		21	1025		58.2	0.67	17.8	6.98	0.15	2.15	4.2	3.55	5.84	0.43	99.97		53.97	0.26	28.41	0.92	0.19	0.32	10.89	4.04	1	100		0.968708	0.00838548	0.349157	0.0971468	0.00211446	0.0533499	0.074893	0.114553	0.123992	0.00605903	1.79836		0.538663	0.00466285	0.194153	0.0540197	0.00117577	0.0296659	0.0416452	0.0636987	0.0689471	0.0033692
Nicotra et al. (2018)		28	1025		58.2	0.67	17.8	6.98	0.15	2.15	4.2	3.55	5.84	0.43	99.97		53.91	0.18	28.54	0.75	0.13	0.36	11.23	3.89	1.02	100.01		0.968708	0.00838548	0.349157	0.0971468	0.00211446	0.0533499	0.074893	0.114553	0.123992	0.00605903	1.79836		0.538663	0.00466285	0.194153	0.0540197	0.00117577	0.0296659	0.0416452	0.0636987	0.0689471	0.0033692
Nicotra et al. (2018)		35	1025		58.2	0.67	17.8	6.98	0.15	2.15	4.2	3.55	5.84	0.43	99.97		53.91	0.22	28.56	0.89	0.17	0.33	10.91	4.03	0.97	99.99		0.968708	0.00838548	0.349157	0.0971468	0.00211446	0.0533499	0.074893	0.114553	0.123992	0.00605903	1.79836		0.538663	0.00466285	0.194153	0.0540197	0.00117577	0.0296659	0.0416452	0.0636987	0.0689471	0.0033692
Nicotra et al. (2018)		42	1025		58.2	0.67	17.8	6.98	0.15	2.15	4.2	3.55	5.84	0.43	99.97		54.83	0.19	28.1	0.87	0.11	0.18	10.4	4.24	1.09	100.01		0.968708	0.00838548	0.349157	0.0971468	0.00211446	0.0533499	0.074893	0.114553	0.123992	0.00605903	1.79836		0.538663	0.00466285	0.194153	0.0540197	0.00117577	0.0296659	0.0416452	0.0636987	0.0689471	0.0033692
Nicotra et al. (2018)		49	1025		58.2	0.67	17.8	6.98	0.15	2.15	4.2	3.55	5.84	0.43	99.97		53.8	0.36	28.28	0.78	0.23	0.35	10.96	4.23	1.02	100.01		0.968708	0.00838548	0.349157	0.0971468	0.00211446	0.0533499	0.074893	0.114553	0.123992	0.00605903	1.79836		0.538663	0.00466285	0.194153	0.0540197	0.00117577	0.0296659	0.0416452	0.0636987	0.0689471	0.0033692
Nicotra et al. (2018)		56	1025		58.2	0.67	17.8	6.98	0.15	2.15	4.2	3.55	5.84	0.43	99.97		54.49	0.16	28.41	0.81	0.09	0.23	10.76	4.03	1.04	100.02		0.968708	0.00838548	0.349157	0.0971468	0.00211446	0.0533499	0.074893	0.114553	0.123992	0.00605903	1.79836		0.538663	0.00466285	0.194153	0.0540197	0.00117577	0.0296659	0.0416452	0.0636987	0.0689471	0.0033692
Nicotra et al. (2018)		63	1025		58.2	0.67	17.8	6.98	0.15	2.15	4.2	3.55	5.84	0.43	99.97		54.19	0.21	28.6	0.75	0.1	0.2	11.01	3.92	1.03	100.01		0.968708	0.00838548	0.349157	0.0971468	0.00211446	0.0533499	0.074893	0.114553	0.123992	0.00605903	1.79836		0.538663	0.00466285	0.194153	0.0540197	0.00117577	0.0296659	0.0416452	0.0636987	0.0689471	0.0033692
Nicotra et al. (2018)		70	1025		58.2	0.67	17.8	6.98	0.15	2.15	4.2	3.55	5.84	0.43	99.97		54.32	0.25	28.21	0.83	0.14	0.13	10.94	4.08	1.1	100		0.968708	0.00838548	0.349157	0.0971468	0.00211446	0.0533499	0.074893	0.114553	0.123992	0.00605903	1.79836		0.538663	0.00466285	0.194153	0.0540197	0.00117577	0.0296659	0.0416452	0.0636987	0.0689471	0.0033692
Nicotra et al. (2018)		77	1025		58.2	0.67	17.8	6.98	0.15	2.15	4.2	3.55	5.84	0.43	99.97		53.97	0.21	28.88	0.72	0.06	0.24	11.27	3.76	0.88	99.99		0.968708	0.00838548	0.349157	0.0971468	0.00211446	0.0533499	0.074893	0.114553	0.123992	0.00605903	1.79836		0.538663	0.00466285	0.194153	0.0540197	0.00117577	0.0296659	0.0416452	0.0636987	0.0689471	0.0033692
Nicotra et al. (2018)		84	1025		58.2	0.67	17.8	6.98	0.15	2.15	4.2	3.55	5.84	0.43	99.97		56.38	0.21	26.53	0.86	0.17	0.3	9.19	4.35	2.02	100.01		0.968708	0.00838548	0.349157	0.0971468	0.00211446	0.0533499	0.074893	0.114553	0.123992	0.00605903	1.79836		0.538663	0.00466285	0.194153	0.0540197	0.00117577	0.0296659	0.0416452	0.0636987	0.0689471	0.0033692
Nicotra et al. (2018)		91	1025		58.2	0.67	17.8	6.98	0.15	2.15	4.2	3.55	5.84	0.43	99.97		54.42	0.25	28.34	0.78	0.12	0.17	10.75	4.13	1.04	100		0.968708	0.00838548	0.349157	0.0971468	0.00211446	0.0533499	0.074893	0.114553	0.123992	0.00605903	1.79836		0.538663	0.00466285	0.194153	0.0540197	0.00117577	0.0296659	0.0416452	0.0636987	0.0689471	0.0033692
Nicotra et al. (2018)		98	1025		58.2	0.67	17.8	6.98	0.15	2.15	4.2	3.55	5.84	0.43	99.97		54.58	0.36	28	0.83	0.09	0.13	11.1	3.9	1.01	100		0.968708	0.00838548	0.349157	0.0971468	0.00211446	0.0533499	0.074893	0.114553	0.123992	0.00605903	1.79836		0.538663	0.00466285	0.194153	0.0540197	0.00117577	0.0296659	0.0416452	0.0636987	0.0689471	0.0033692
Nicotra et al. (2018)		105	1025		58.2	0.67	17.8	6.98	0.15	2.15	4.2	3.55	5.84	0.43	99.97		54.08	0.1	28.38	0.81	0.14	0.36	11.06	4.12	0.95	100		0.968708	0.00838548	0.349157	0.0971468	0.00211446	0.0533499	0.074893	0.114553	0.123992	0.00605903	1.79836		0.538663	0.00466285	0.194153	0.0540197	0.00117577	0.0296659	0.0416452	0.0636987	0.0689471	0.0033692
Nicotra et al. (2018)		112	1025		58.2	0.67	17.8	6.98	0.15	2.15	4.2	3.55	5.84	0.43	99.97		53.73	0.29	28.52	0.79	0.15	0.22	11.32	4.02	0.96	100		0.968708	0.00838548	0.349157	0.0971468	0.00211446	0.0533499	0.074893	0.114553	0.123992	0.00605903	1.79836		0.538663	0.00466285	0.194153	0.0540197	0.00117577	0.0296659	0.0416452	0.0636987	0.0689471	0.0033692
Nicotra et al. (2018)		119	1025		58.2	0.67	17.8	6.98	0.15	2.15	4.2	3.55	5.84	0.43	99.97		54.37	0.19	28.58	0.68	0.1	0.2	10.95	3.95	0.97	99.99		0.968708	0.00838548	0.349157	0.0971468	0.00211446	0.0533499	0.074893	0.114553	0.123992	0.00605903	1.79836		0.538663	0.00466285	0.194153	0.0540197	0.00117577	0.0296659	0.0416452	0.0636987	0.0689471	0.0033692
Nicotra et al. (2018)		126	1025		58.2	0.67	17.8	6.98	0.15	2.15	4.2	3.55	5.84	0.43	99.97		55.15	0.19	27.66	0.76	0.11	0.22	10.26	4.4	1.23	99.98		0.968708	0.00838548	0.349157	0.0971468	0.00211446	0.0533499	0.074893	0.114553	0.123992	0.00605903	1.79836		0.538663	0.00466285	0.194153	0.0540197	0.00117577	0.0296659	0.0416452	0.0636987	0.0689471	0.0033692
Nicotra et al. (2018)		133	1025		58.2	0.67	17.8	6.98	0.15	2.15	4.2	3.55	5.84	0.43	99.97		53.64	0.24	28.55	0.88	0.2	0.2	11.38	3.89	1.02	100		0.968708	0.00838548	0.349157	0.0971468	0.00211446	0.0533499	0.074893	0.114553	0.123992	0.00605903	1.79836		0.538663	0.00466285	0.194153	0.0540197	0.00117577	0.0296659	0.0416452	0.0636987	0.0689471	0.0033692
Nicotra et al. (2018)		140	1025		58.2	0.67	17.8	6.98	0.15	2.15	4.2	3.55	5.84	0.43	99.97		54.99	0.27	27.84	0.85	0.07	0.25	10.4	4.21	1.12	100		0.968708	0.00838548	0.349157	0.0971468	0.00211446	0.0533499	0.074893	0.114553	0.123992	0.00605903	1.79836		0.538663	0.00466285	0.194153	0.0540197	0.00117577	0.0296659	0.0416452	0.0636987	0.0689471	0.0033692
Nicotra et al. (2018)		147	1025		58.2	0.67	17.8	6.98	0.15	2.15	4.2	3.55	5.84	0.43	99.97		54.37	0.29	28.29	0.84	0.14	0.44	10.51	4.03	1.09	100		0.968708	0.00838548	0.349157	0.0971468	0.00211446	0.0533499	0.074893	0.114553	0.123992	0.00605903	1.79836		0.538663	0.00466285	0.194153	0.0540197	0.00117577	0.0296659	0.0416452	0.0636987	0.0689471	0.0033692
Nicotra et al. (2018)		154	1025		58.2	0.67	17.8	6.98	0.15	2.15	4.2	3.55	5.84	0.43	99.97		54.07	0.26	28.66	0.77	0.17	0.31	10.36	4.34	1.06	100		0.968708	0.00838548	0.349157	0.0971468	0.00211446	0.0533499	0.074893	0.114553	0.123992	0.00605903	1.79836		0.538663	0.00466285	0.194153	0.0540197	0.00117577	0.0296659	0.0416452	0.0636987	0.0689471	0.0033692
Nicotra et al. (2018)		161	1025		58.2	0.67	17.8	6.98	0.15	2.15	4.2	3.55	5.84	0.43	99.97		54.63	0.26	27.78	1.05	0.17	0.43	10.41	3.99	1.28	100		0.968708	0.00838548	0.349157	0.0971468	0.00211446	0.0533499	0.074893	0.114553	0.123992	0.00605903	1.79836		0.538663	0.00466285	0.194153	0.0540197	0.00117577	0.0296659	0.0416452	0.0636987	0.0689471	0.0033692
Nicotra et al. (2018)		168	1025		58.2	0.67	17.8	6.98	0.15	2.15	4.2	3.55	5.84	0.43	99.97		54.43	0.15	28.14	0.8	0.18	0.23	10.54	4.39	1.13	99.99		0.968708	0.00838548	0.349157	0.0971468	0.00211446	0.0533499	0.074893	0.114553	0.123992	0.00605903	1.79836		0.538663	0.00466285	0.194153	0.0540197	0.00117577	0.0296659	0.0416452	0.0636987	0.0689471	0.0033692
Nicotra et al. (2018)		175	1025		58.2	0.67	17.8	6.98	0.15	2.15	4.2	3.55	5.84	0.43	99.97		54.54	0.3	27.93	0.8	0.13	0.35	10.54	4.29	1.12	100		0.968708	0.00838548	0.349157	0.0971468	0.00211446	0.0533499	0.074893	0.114553	0.123992	0.00605903	1.79836		0.538663	0.00466285	0.194153	0.0540197	0.00117577	0.0296659	0.0416452	0.0636987	0.0689471	0.0033692
Nicotra et al. (2018)		182	1025		58.2	0.67	17.8	6.98	0.15	2.15	4.2	3.55	5.84	0.43	99.97		54.59	0.23	28.29	0.86	0.13	0.14	10.52	4.11	1.13	100		0.968708	0.00838548	0.349157	0.0971468	0.00211446	0.0533499	0.074893	0.114553	0.123992	0.00605903	1.79836		0.538663	0.00466285	0.194153	0.0540197	0.00117577	0.0296659	0.0416452	0.0636987	0.0689471	0.0033692
Nicotra et al. (2018)		189	1025		58.2	0.67	17.8	6.98	0.15	2.15	4.2	3.55	5.84	0.43	99.97		55.03	0.28	27.8	0.8	0.12	0.21	10.28	4.36	1.11	99.99		0.968708	0.00838548	0.349157	0.0971468	0.00211446	0.0533499	0.074893	0.114553	0.123992	0.00605903	1.79836		0.538663	0.00466285	0.194153	0.0540197	0.00117577	0.0296659	0.0416452	0.0636987	0.0689471	0.0033692
Nicotra et al. (2018)		196	1025		58.2	0.67	17.8	6.98	0.15	2.15	4.2	3.55	5.84	0.43	99.97		54.13	0.28	28.22	0.89	0.2	0.24	10.69	4.27	1.07	99.99		0.968708	0.00838548	0.349157	0.0971468	0.00211446	0.0533499	0.074893	0.114553	0.123992	0.00605903	1.79836		0.538663	0.00466285	0.194153	0.0540197	0.00117577	0.0296659	0.0416452	0.0636987	0.0689471	0.0033692
Nicotra et al. (2018)		203	1025		58.2	0.67	17.8	6.98	0.15	2.15	4.2	3.55	5.84	0.43	99.97		54.53	0.21	28.19	0.79	0.08	0.28	10.61	4.22	1.08	99.99		0.968708	0.00838548	0.349157	0.0971468	0.00211446	0.0533499	0.074893	0.114553	0.123992	0.00605903	1.79836		0.538663	0.00466285	0.194153	0.0540197	0.00117577	0.0296659	0.0416452	0.0636987	0.0689471	0.0033692
Nicotra et al. (2018)		210	1025		58.2	0.67	17.8	6.98	0.15	2.15	4.2	3.55	5.84	0.43	99.97		54.01	0.22	28.34	0.89	0.23	0.27	11.04	4.02	0.98	100		0.968708	0.00838548	0.349157	0.0971468	0.00211446	0.0533499	0.074893	0.114553	0.123992	0.00605903	1.79836		0.538663	0.00466285	0.194153	0.0540197	0.00117577	0.0296659	0.0416452	0.0636987	0.0689471	0.0033692
Nicotra et al. (2018)		217	1025		58.2	0.67	17.8	6.98	0.15	2.15	4.2	3.55	5.84	0.43	99.97		54.3	0.3	28.1	0.77	0.2	0.29	10.76	4.24	1.05	100.01		0.968708	0.00838548	0.349157	0.0971468	0.00211446	0.0533499	0.074893	0.114553	0.123992	0.00605903	1.79836		0.538663	0.00466285	0.194153	0.0540197	0.00117577	0.0296659	0.0416452	0.0636987	0.0689471	0.0033692
Nicotra et al. (2018)		224	1025		58.2	0.67	17.8	6.98	0.15	2.15	4.2	3.55	5.84	0.43	99.97		54.61	0.22	28.2	0.75	0.14	0.17	10.75	4.13	1.03	100		0.968708	0.00838548	0.349157	0.0971468	0.00211446	0.0533499	0.074893	0.114553	0.123992	0.00605903	1.79836		0.538663	0.00466285	0.194153	0.0540197	0.00117577	0.0296659	0.0416452	0.0636987	0.0689471	0.0033692
Nicotra et al. (2018)		231	1025		58.2	0.67	17.8	6.98	0.15	2.15	4.2	3.55	5.84	0.43	99.97		54.48	0.26	28.31	0.84	0.13	0.13	10.8	4.07	0.98	100		0.968708	0.00838548	0.349157	0.0971468	0.00211446	0.0533499	0.074893	0.114553	0.123992	0.00605903	1.79836		0.538663	0.00466285	0.194153	0.0540197	0.00117577	0.0296659	0.0416452	0.0636987	0.0689471	0.0033692
Nicotra et al. (2018)		238	1025		58.2	0.67	17.8	6.98	0.15	2.15	4.2	3.55	5.84	0.43	99.97		54.07	0.2	28.59	0.65	0.09	0.28	11.05	4.02	1.04	99.99		0.968708	0.00838548	0.349157	0.0971468	0.00211446	0.0533499	0.074893	0.114553	0.123992	0.00605903	1.79836		0.538663	0.00466285	0.194153	0.0540197	0.00117577	0.0296659	0.0416452	0.0636987	0.0689471	0.0033692
Nicotra et al. (2018)		245	1025		58.2	0.67	17.8	6.98	0.15	2.15	4.2	3.55	5.84	0.43	99.97		53.71	0.16	29.07	0.78	0.13	0.12	11.41	3.75	0.86	99.99		0.968708	0.00838548	0.349157	0.0971468	0.00211446	0.0533499	0.074893	0.114553	0.123992	0.00605903	1.79836		0.538663	0.00466285	0.194153	0.0540197	0.00117577	0.0296659	0.0416452	0.0636987	0.0689471	0.0033692
Nicotra et al. (2018)		252	1025		58.2	0.67	17.8	6.98	0.15	2.15	4.2	3.55	5.84	0.43	99.97		53.82	0.21	28.87	0.78	0.18	0.17	11.19	3.87	0.91	100		0.968708	0.00838548	0.349157	0.0971468	0.00211446	0.0533499	0.074893	0.114553	0.123992	0.00605903	1.79836		0.538663	0.00466285	0.194153	0.0540197	0.00117577	0.0296659	0.0416452	0.0636987	0.0689471	0.0033692
Nicotra et al. (2018)		259	1025		58.2	0.67	17.8	6.98	0.15	2.15	4.2	3.55	5.84	0.43	99.97		53.98	0.19	28.93	0.67	0.09	0	11.5	3.67	0.97	100		0.968708	0.00838548	0.349157	0.0971468	0.00211446	0.0533499	0.074893	0.114553	0.123992	0.00605903	1.79836		0.538663	0.00466285	0.194153	0.0540197	0.00117577	0.0296659	0.0416452	0.0636987	0.0689471	0.0033692
Nicotra et al. (2018)		266	1025		58.2	0.67	17.8	6.98	0.15	2.15	4.2	3.55	5.84	0.43	99.97		55.84	0.21	27.52	0.77	0.12	0.2	9.66	4.32	1.35	99.99		0.968708	0.00838548	0.349157	0.0971468	0.00211446	0.0533499	0.074893	0.114553	0.123992	0.00605903	1.79836		0.538663	0.00466285	0.194153	0.0540197	0.00117577	0.0296659	0.0416452	0.0636987	0.0689471	0.0033692
Nicotra et al. (2018)		273	1025		58.2	0.67	17.8	6.98	0.15	2.15	4.2	3.55	5.84	0.43	99.97		54.96	0.19	27.97	0.72	0.05	0.3	10.38	4.24	1.18	99.99		0.968708	0.00838548	0.349157	0.0971468	0.00211446	0.0533499	0.074893	0.114553	0.123992	0.00605903	1.79836		0.538663	0.00466285	0.194153	0.0540197	0.00117577	0.0296659	0.0416452	0.0636987	0.0689471	0.0033692
Nicotra et al. (2018)		280	1025		58.2	0.67	17.8	6.98	0.15	2.15	4.2	3.55	5.84	0.43	99.97		55.29	0.24	27.64	0.79	0.21	0.38	9.87	4.42	1.15	99.99		0.968708	0.00838548	0.349157	0.0971468	0.00211446	0.0533499	0.074893	0.114553	0.123992	0.00605903	1.79836		0.538663	0.00466285	0.194153	0.0540197	0.00117577	0.0296659	0.0416452	0.0636987	0.0689471	0.0033692
Nicotra et al. (2018)		287	1025		58.2	0.67	17.8	6.98	0.15	2.15	4.2	3.55	5.84	0.43	99.97		54.65	0.24	27.98	0.95	0.16	0.19	10.63	4.1	1.1	100		0.968708	0.00838548	0.349157	0.0971468	0.00211446	0.0533499	0.074893	0.114553	0.123992	0.00605903	1.79836		0.538663	0.00466285	0.194153	0.0540197	0.00117577	0.0296659	0.0416452	0.0636987	0.0689471	0.0033692
Nicotra et al. (2018)		294	1025		58.2	0.67	17.8	6.98	0.15	2.15	4.2	3.55	5.84	0.43	99.97		54.59	0.27	27.99	0.83	0.13	0.32	10.68	4.08	1.11	100		0.968708	0.00838548	0.349157	0.0971468	0.00211446	0.0533499	0.074893	0.114553	0.123992	0.00605903	1.79836		0.538663	0.00466285	0.194153	0.0540197	0.00117577	0.0296659	0.0416452	0.0636987	0.0689471	0.0033692
Nicotra et al. (2018)		301	1025		58.2	0.67	17.8	6.98	0.15	2.15	4.2	3.55	5.84	0.43	99.97		55.38	0.33	27.54	0.83	0.17	0.2	9.94	4.33	1.28	100		0.968708	0.00838548	0.349157	0.0971468	0.00211446	0.0533499	0.074893	0.114553	0.123992	0.00605903	1.79836		0.538663	0.00466285	0.194153	0.0540197	0.00117577	0.0296659	0.0416452	0.0636987	0.0689471	0.0033692
Nicotra et al. (2018)		308	1025		58.2	0.67	17.8	6.98	0.15	2.15	4.2	3.55	5.84	0.43	99.97		55.49	0.31	27.67	0.76	0.1	0.07	9.85	4.52	1.23	100		0.968708	0.00838548	0.349157	0.0971468	0.00211446	0.0533499	0.074893	0.114553	0.123992	0.00605903	1.79836		0.538663	0.00466285	0.194153	0.0540197	0.00117577	0.0296659	0.0416452	0.0636987	0.0689471	0.0033692
Nicotra et al. (2018)		315	1025		58.2	0.67	17.8	6.98	0.15	2.15	4.2	3.55	5.84	0.43	99.97		54.37	0.29	28.3	0.85	0.23	0.33	10.47	4.1	1.05	99.99		0.968708	0.00838548	0.349157	0.0971468	0.00211446	0.0533499	0.074893	0.114553	0.123992	0.00605903	1.79836		0.538663	0.00466285	0.194153	0.0540197	0.00117577	0.0296659	0.0416452	0.0636987	0.0689471	0.0033692
Nicotra et al. (2018)		322	1025		58.2	0.67	17.8	6.98	0.15	2.15	4.2	3.55	5.84	0.43	99.97		54.27	0.22	28.3	0.69	0.09	0.25	10.96	4.2	1.03	100.01		0.968708	0.00838548	0.349157	0.0971468	0.00211446	0.0533499	0.074893	0.114553	0.123992	0.00605903	1.79836		0.538663	0.00466285	0.194153	0.0540197	0.00117577	0.0296659	0.0416452	0.0636987	0.0689471	0.0033692
Nicotra et al. (2018)		329	1025		58.2	0.67	17.8	6.98	0.15	2.15	4.2	3.55	5.84	0.43	99.97		54.81	0.29	27.95	0.75	0.2	0.19	10.4	4.25	1.17	100.01		0.968708	0.00838548	0.349157	0.0971468	0.00211446	0.0533499	0.074893	0.114553	0.123992	0.00605903	1.79836		0.538663	0.00466285	0.194153	0.0540197	0.00117577	0.0296659	0.0416452	0.0636987	0.0689471	0.0033692
Nicotra et al. (2018)		336	1025		58.2	0.67	17.8	6.98	0.15	2.15	4.2	3.55	5.84	0.43	99.97		55.18	0.28	27.7	0.79	0.17	0.23	10	4.4	1.26	100.01		0.968708	0.00838548	0.349157	0.0971468	0.00211446	0.0533499	0.074893	0.114553	0.123992	0.00605903	1.79836		0.538663	0.00466285	0.194153	0.0540197	0.00117577	0.0296659	0.0416452	0.0636987	0.0689471	0.0033692
Nicotra et al. (2018)		343	1025		58.2	0.67	17.8	6.98	0.15	2.15	4.2	3.55	5.84	0.43	99.97		55.22	0.14	27.99	0.57	0	0.39	10.37	4.17	1.15	100		0.968708	0.00838548	0.349157	0.0971468	0.00211446	0.0533499	0.074893	0.114553	0.123992	0.00605903	1.79836		0.538663	0.00466285	0.194153	0.0540197	0.00117577	0.0296659	0.0416452	0.0636987	0.0689471	0.0033692
Nicotra et al. (2018)		350	1025		58.2	0.67	17.8	6.98	0.15	2.15	4.2	3.55	5.84	0.43	99.97		54.75	0.14	28.32	0.68	0.07	0.2	10.51	4.13	1.2	100		0.968708	0.00838548	0.349157	0.0971468	0.00211446	0.0533499	0.074893	0.114553	0.123992	0.00605903	1.79836		0.538663	0.00466285	0.194153	0.0540197	0.00117577	0.0296659	0.0416452	0.0636987	0.0689471	0.0033692
Nicotra et al. (2018)		357	1025		58.2	0.67	17.8	6.98	0.15	2.15	4.2	3.55	5.84	0.43	99.97		55.47	0.21	27.65	0.59	0.11	0.23	10.19	4.3	1.25	100		0.968708	0.00838548	0.349157	0.0971468	0.00211446	0.0533499	0.074893	0.114553	0.123992	0.00605903	1.79836		0.538663	0.00466285	0.194153	0.0540197	0.00117577	0.0296659	0.0416452	0.0636987	0.0689471	0.0033692
Nicotra et al. (2018)		364	1025		58.2	0.67	17.8	6.98	0.15	2.15	4.2	3.55	5.84	0.43	99.97		55.17	0.12	28.07	0.57	0	0.24	10.51	4.17	1.15	100		0.968708	0.00838548	0.349157	0.0971468	0.00211446	0.0533499	0.074893	0.114553	0.123992	0.00605903	1.79836		0.538663	0.00466285	0.194153	0.0540197	0.00117577	0.0296659	0.0416452	0.0636987	0.0689471	0.0033692
Nicotra et al. (2018)		371	1025		58.2	0.67	17.8	6.98	0.15	2.15	4.2	3.55	5.84	0.43	99.97		54.41	0.22	28.61	0.69	0.07	0.22	10.9	3.95	0.92	99.99		0.968708	0.00838548	0.349157	0.0971468	0.00211446	0.0533499	0.074893	0.114553	0.123992	0.00605903	1.79836		0.538663	0.00466285	0.194153	0.0540197	0.00117577	0.0296659	0.0416452	0.0636987	0.0689471	0.0033692
Nicotra et al. (2018)		378	1025		58.2	0.67	17.8	6.98	0.15	2.15	4.2	3.55	5.84	0.43	99.97		54.15	0	29.01	0.57	0	0.29	11.42	3.79	0.77	100		0.968708	0.00838548	0.349157	0.0971468	0.00211446	0.0533499	0.074893	0.114553	0.123992	0.00605903	1.79836		0.538663	0.00466285	0.194153	0.0540197	0.00117577	0.0296659	0.0416452	0.0636987	0.0689471	0.0033692
Nicotra et al. (2018)		385	1025		58.2	0.67	17.8	6.98	0.15	2.15	4.2	3.55	5.84	0.43	99.97		55.61	0.29	27.39	0.81	0.16	0.28	9.79	4.43	1.23	99.99		0.968708	0.00838548	0.349157	0.0971468	0.00211446	0.0533499	0.074893	0.114553	0.123992	0.00605903	1.79836		0.538663	0.00466285	0.194153	0.0540197	0.00117577	0.0296659	0.0416452	0.0636987	0.0689471	0.0033692
Nicotra et al. (2018)		392	1025		58.2	0.67	17.8	6.98	0.15	2.15	4.2	3.55	5.84	0.43	99.97		54.32	0.14	28.54	0.69	0	0.3	10.77	4.3	0.95	100.01		0.968708	0.00838548	0.349157	0.0971468	0.00211446	0.0533499	0.074893	0.114553	0.123992	0.00605903	1.79836		0.538663	0.00466285	0.194153	0.0540197	0.00117577	0.0296659	0.0416452	0.0636987	0.0689471	0.0033692
Nicotra et al. (2018)		399	1025		58.2	0.67	17.8	6.98	0.15	2.15	4.2	3.55	5.84	0.43	99.97		53.42	0.17	28.88	0.97	0.27	0.21	11.49	3.73	0.87	100.01		0.968708	0.00838548	0.349157	0.0971468	0.00211446	0.0533499	0.074893	0.114553	0.123992	0.00605903	1.79836		0.538663	0.00466285	0.194153	0.0540197	0.00117577	0.0296659	0.0416452	0.0636987	0.0689471	0.0033692
Nicotra et al. (2018)		406	1025		58.2	0.67	17.8	6.98	0.15	2.15	4.2	3.55	5.84	0.43	99.97		53.79	0.18	28.85	0.71	0.1	0.28	11.32	3.86	0.93	100.02		0.968708	0.00838548	0.349157	0.0971468	0.00211446	0.0533499	0.074893	0.114553	0.123992	0.00605903	1.79836		0.538663	0.00466285	0.194153	0.0540197	0.00117577	0.0296659	0.0416452	0.0636987	0.0689471	0.0033692
Nicotra et al. (2018)		413	1025		58.2	0.67	17.8	6.98	0.15	2.15	4.2	3.55	5.84	0.43	99.97		52.8	0.25	29.29	0.84	0.21	0.31	11.71	3.75	0.85	100.01		0.968708	0.00838548	0.349157	0.0971468	0.00211446	0.0533499	0.074893	0.114553	0.123992	0.00605903	1.79836		0.538663	0.00466285	0.194153	0.0540197	0.00117577	0.0296659	0.0416452	0.0636987	0.0689471	0.0033692
Nicotra et al. (2018)		420	1025		58.2	0.67	17.8	6.98	0.15	2.15	4.2	3.55	5.84	0.43	99.97		54.68	0.27	28.14	0.75	0.12	0.2	10.63	4.19	1.03	100.01		0.968708	0.00838548	0.349157	0.0971468	0.00211446	0.0533499	0.074893	0.114553	0.123992	0.00605903	1.79836		0.538663	0.00466285	0.194153	0.0540197	0.00117577	0.0296659	0.0416452	0.0636987	0.0689471	0.0033692
Nicotra et al. (2018)		427	1025		58.2	0.67	17.8	6.98	0.15	2.15	4.2	3.55	5.84	0.43	99.97		54.18	0.19	28.49	0.89	0.11	0.4	10.89	3.92	0.95	100.02		0.968708	0.00838548	0.349157	0.0971468	0.00211446	0.0533499	0.074893	0.114553	0.123992	0.00605903	1.79836		0.538663	0.00466285	0.194153	0.0540197	0.00117577	0.0296659	0.0416452	0.0636987	0.0689471	0.0033692
Nicotra et al. (2018)		434	1025		58.2	0.67	17.8	6.98	0.15	2.15	4.2	3.55	5.84	0.43	99.97		55.66	0.34	26.42	1.2	0.15	0.33	9.42	4.74	1.75	100.01		0.968708	0.00838548	0.349157	0.0971468	0.00211446	0.0533499	0.074893	0.114553	0.123992	0.00605903	1.79836		0.538663	0.00466285	0.194153	0.0540197	0.00117577	0.0296659	0.0416452	0.0636987	0.0689471	0.0033692
Nicotra et al. (2018)		441	1025		58.2	0.67	17.8	6.98	0.15	2.15	4.2	3.55	5.84	0.43	99.97		54.84	0.24	28.02	0.81	0.08	0.32	10.23	4.39	1.08	100.01		0.968708	0.00838548	0.349157	0.0971468	0.00211446	0.0533499	0.074893	0.114553	0.123992	0.00605903	1.79836		0.538663	0.00466285	0.194153	0.0540197	0.00117577	0.0296659	0.0416452	0.0636987	0.0689471	0.0033692
Nicotra et al. (2018)		448	1025		58.2	0.67	17.8	6.98	0.15	2.15	4.2	3.55	5.84	0.43	99.97		55.79	0.28	27.27	0.81	0.07	0.25	9.79	4.46	1.28	100		0.968708	0.00838548	0.349157	0.0971468	0.00211446	0.0533499	0.074893	0.114553	0.123992	0.00605903	1.79836		0.538663	0.00466285	0.194153	0.0540197	0.00117577	0.0296659	0.0416452	0.0636987	0.0689471	0.0033692
Nicotra et al. (2018)		455	1025		58.2	0.67	17.8	6.98	0.15	2.15	4.2	3.55	5.84	0.43	99.97		56.45	0.2	27.02	0.8	0.13	0.22	9.28	4.45	1.45	100		0.968708	0.00838548	0.349157	0.0971468	0.00211446	0.0533499	0.074893	0.114553	0.123992	0.00605903	1.79836		0.538663	0.00466285	0.194153	0.0540197	0.00117577	0.0296659	0.0416452	0.0636987	0.0689471	0.0033692
Nicotra et al. (2018)		462	1025		58.2	0.67	17.8	6.98	0.15	2.15	4.2	3.55	5.84	0.43	99.97		57.19	0.23	26.14	0.82	0.21	0.18	8.65	4.96	1.63	100.01		0.968708	0.00838548	0.349157	0.0971468	0.00211446	0.0533499	0.074893	0.114553	0.123992	0.00605903	1.79836		0.538663	0.00466285	0.194153	0.0540197	0.00117577	0.0296659	0.0416452	0.0636987	0.0689471	0.0033692
Nicotra et al. (2018)		469	1025		58.2	0.67	17.8	6.98	0.15	2.15	4.2	3.55	5.84	0.43	99.97		55.26	0.24	27.99	0.68	0.09	0.24	10.01	4.35	1.15	100.01		0.968708	0.00838548	0.349157	0.0971468	0.00211446	0.0533499	0.074893	0.114553	0.123992	0.00605903	1.79836		0.538663	0.00466285	0.194153	0.0540197	0.00117577	0.0296659	0.0416452	0.0636987	0.0689471	0.0033692
Nicotra et al. (2018)		476	1025		58.2	0.67	17.8	6.98	0.15	2.15	4.2	3.55	5.84	0.43	99.97		55.62	0.34	27.05	0.81	0.17	0.27	9.49	4.81	1.44	100		0.968708	0.00838548	0.349157	0.0971468	0.00211446	0.0533499	0.074893	0.114553	0.123992	0.00605903	1.79836		0.538663	0.00466285	0.194153	0.0540197	0.00117577	0.0296659	0.0416452	0.0636987	0.0689471	0.0033692
Nicotra et al. (2018)		483	1025		58.2	0.67	17.8	6.98	0.15	2.15	4.2	3.55	5.84	0.43	99.97		54.84	0.19	28.11	0.74	0.13	0.25	10.44	4.22	1.07	99.99		0.968708	0.00838548	0.349157	0.0971468	0.00211446	0.0533499	0.074893	0.114553	0.123992	0.00605903	1.79836		0.538663	0.00466285	0.194153	0.0540197	0.00117577	0.0296659	0.0416452	0.0636987	0.0689471	0.0033692
Nicotra et al. (2018)		490	1025		58.2	0.67	17.8	6.98	0.15	2.15	4.2	3.55	5.84	0.43	99.97		55.24	0.22	27.74	0.7	0.1	0.26	10.17	4.42	1.15	100		0.968708	0.00838548	0.349157	0.0971468	0.00211446	0.0533499	0.074893	0.114553	0.123992	0.00605903	1.79836		0.538663	0.00466285	0.194153	0.0540197	0.00117577	0.0296659	0.0416452	0.0636987	0.0689471	0.0033692
Punte Nere Latite - VL315 Plag2		profile	1025
Nicotra et al. (2018)		0	1025		58.2	0.67	17.8	6.98	0.15	2.15	4.2	3.55	5.84	0.43	99.97		54.2	0.2	28.56	0.87	0.17	0.17	11.08	3.83	0.92	100		0.968708	0.00838548	0.349157	0.0971468	0.00211446	0.0533499	0.074893	0.114553	0.123992	0.00605903	1.79836		0.538663	0.00466285	0.194153	0.0540197	0.00117577	0.0296659	0.0416452	0.0636987	0.0689471	0.0033692
Nicotra et al. (2018)		7	1025		58.2	0.67	17.8	6.98	0.15	2.15	4.2	3.55	5.84	0.43	99.97		53.58	0.26	28.84	0.69	0.09	0.33	11.41	3.86	0.94	100		0.968708	0.00838548	0.349157	0.0971468	0.00211446	0.0533499	0.074893	0.114553	0.123992	0.00605903	1.79836		0.538663	0.00466285	0.194153	0.0540197	0.00117577	0.0296659	0.0416452	0.0636987	0.0689471	0.0033692
Nicotra et al. (2018)		14	1025		58.2	0.67	17.8	6.98	0.15	2.15	4.2	3.55	5.84	0.43	99.97		54.14	0.26	28.69	0.64	0.06	0.32	10.74	4.17	0.97	99.99		0.968708	0.00838548	0.349157	0.0971468	0.00211446	0.0533499	0.074893	0.114553	0.123992	0.00605903	1.79836		0.538663	0.00466285	0.194153	0.0540197	0.00117577	0.0296659	0.0416452	0.0636987	0.0689471	0.0033692
Nicotra et al. (2018)		21	1025		58.2	0.67	17.8	6.98	0.15	2.15	4.2	3.55	5.84	0.43	99.97		54.21	0.16	28.49	0.76	0.16	0.36	10.5	4.41	0.95	100		0.968708	0.00838548	0.349157	0.0971468	0.00211446	0.0533499	0.074893	0.114553	0.123992	0.00605903	1.79836		0.538663	0.00466285	0.194153	0.0540197	0.00117577	0.0296659	0.0416452	0.0636987	0.0689471	0.0033692
Nicotra et al. (2018)		28	1025		58.2	0.67	17.8	6.98	0.15	2.15	4.2	3.55	5.84	0.43	99.97		54.18	0.32	28.29	0.75	0.32	0.23	10.73	4.16	1.03	100.01		0.968708	0.00838548	0.349157	0.0971468	0.00211446	0.0533499	0.074893	0.114553	0.123992	0.00605903	1.79836		0.538663	0.00466285	0.194153	0.0540197	0.00117577	0.0296659	0.0416452	0.0636987	0.0689471	0.0033692
Nicotra et al. (2018)		35	1025		58.2	0.67	17.8	6.98	0.15	2.15	4.2	3.55	5.84	0.43	99.97		54.89	0.13	28.3	0.67	0.15	0.34	10.46	4.08	0.99	100.01		0.968708	0.00838548	0.349157	0.0971468	0.00211446	0.0533499	0.074893	0.114553	0.123992	0.00605903	1.79836		0.538663	0.00466285	0.194153	0.0540197	0.00117577	0.0296659	0.0416452	0.0636987	0.0689471	0.0033692
Nicotra et al. (2018)		42	1025		58.2	0.67	17.8	6.98	0.15	2.15	4.2	3.55	5.84	0.43	99.97		54.49	0.23	28.24	0.72	0.17	0.31	10.56	4.24	1.03	99.99		0.968708	0.00838548	0.349157	0.0971468	0.00211446	0.0533499	0.074893	0.114553	0.123992	0.00605903	1.79836		0.538663	0.00466285	0.194153	0.0540197	0.00117577	0.0296659	0.0416452	0.0636987	0.0689471	0.0033692
Nicotra et al. (2018)		49	1025		58.2	0.67	17.8	6.98	0.15	2.15	4.2	3.55	5.84	0.43	99.97		54.58	0.28	27.95	0.8	0.13	0.25	10.79	4.19	1.02	99.99		0.968708	0.00838548	0.349157	0.0971468	0.00211446	0.0533499	0.074893	0.114553	0.123992	0.00605903	1.79836		0.538663	0.00466285	0.194153	0.0540197	0.00117577	0.0296659	0.0416452	0.0636987	0.0689471	0.0033692
Nicotra et al. (2018)		56	1025		58.2	0.67	17.8	6.98	0.15	2.15	4.2	3.55	5.84	0.43	99.97		54.84	0.25	28.14	0.73	0.21	0.18	10.4	4.17	1.08	100		0.968708	0.00838548	0.349157	0.0971468	0.00211446	0.0533499	0.074893	0.114553	0.123992	0.00605903	1.79836		0.538663	0.00466285	0.194153	0.0540197	0.00117577	0.0296659	0.0416452	0.0636987	0.0689471	0.0033692
Nicotra et al. (2018)		63	1025		58.2	0.67	17.8	6.98	0.15	2.15	4.2	3.55	5.84	0.43	99.97		54.8	0.2	28.23	0.66	0.1	0.13	10.62	4.21	1.04	99.99		0.968708	0.00838548	0.349157	0.0971468	0.00211446	0.0533499	0.074893	0.114553	0.123992	0.00605903	1.79836		0.538663	0.00466285	0.194153	0.0540197	0.00117577	0.0296659	0.0416452	0.0636987	0.0689471	0.0033692
Nicotra et al. (2018)		70	1025		58.2	0.67	17.8	6.98	0.15	2.15	4.2	3.55	5.84	0.43	99.97		55.37	0.22	27.82	0.64	0.09	0.19	10.23	4.37	1.07	100		0.968708	0.00838548	0.349157	0.0971468	0.00211446	0.0533499	0.074893	0.114553	0.123992	0.00605903	1.79836		0.538663	0.00466285	0.194153	0.0540197	0.00117577	0.0296659	0.0416452	0.0636987	0.0689471	0.0033692
Nicotra et al. (2018)		77	1025		58.2	0.67	17.8	6.98	0.15	2.15	4.2	3.55	5.84	0.43	99.97		54.59	0.16	28.31	0.65	0.17	0.15	11.03	4.02	0.92	100		0.968708	0.00838548	0.349157	0.0971468	0.00211446	0.0533499	0.074893	0.114553	0.123992	0.00605903	1.79836		0.538663	0.00466285	0.194153	0.0540197	0.00117577	0.0296659	0.0416452	0.0636987	0.0689471	0.0033692
Nicotra et al. (2018)		84	1025		58.2	0.67	17.8	6.98	0.15	2.15	4.2	3.55	5.84	0.43	99.97		54.25	0.12	28.55	0.8	0.06	0.28	10.85	4.06	1.03	100		0.968708	0.00838548	0.349157	0.0971468	0.00211446	0.0533499	0.074893	0.114553	0.123992	0.00605903	1.79836		0.538663	0.00466285	0.194153	0.0540197	0.00117577	0.0296659	0.0416452	0.0636987	0.0689471	0.0033692
Nicotra et al. (2018)		91	1025		58.2	0.67	17.8	6.98	0.15	2.15	4.2	3.55	5.84	0.43	99.97		55.07	0.24	27.85	0.58	0.12	0.21	10.59	4.27	1.07	100		0.968708	0.00838548	0.349157	0.0971468	0.00211446	0.0533499	0.074893	0.114553	0.123992	0.00605903	1.79836		0.538663	0.00466285	0.194153	0.0540197	0.00117577	0.0296659	0.0416452	0.0636987	0.0689471	0.0033692
Nicotra et al. (2018)		98	1025		58.2	0.67	17.8	6.98	0.15	2.15	4.2	3.55	5.84	0.43	99.97		54.54	0.25	28.11	0.83	0.14	0.3	10.46	4.29	1.07	99.99		0.968708	0.00838548	0.349157	0.0971468	0.00211446	0.0533499	0.074893	0.114553	0.123992	0.00605903	1.79836		0.538663	0.00466285	0.194153	0.0540197	0.00117577	0.0296659	0.0416452	0.0636987	0.0689471	0.0033692
Nicotra et al. (2018)		105	1025		58.2	0.67	17.8	6.98	0.15	2.15	4.2	3.55	5.84	0.43	99.97		54.83	0.17	28.2	0.67	0.07	0.23	10.28	4.42	1.13	100		0.968708	0.00838548	0.349157	0.0971468	0.00211446	0.0533499	0.074893	0.114553	0.123992	0.00605903	1.79836		0.538663	0.00466285	0.194153	0.0540197	0.00117577	0.0296659	0.0416452	0.0636987	0.0689471	0.0033692
Nicotra et al. (2018)		112	1025		58.2	0.67	17.8	6.98	0.15	2.15	4.2	3.55	5.84	0.43	99.97		55.15	0.18	28.04	0.71	0.16	0.19	10.38	4.15	1.06	100.02		0.968708	0.00838548	0.349157	0.0971468	0.00211446	0.0533499	0.074893	0.114553	0.123992	0.00605903	1.79836		0.538663	0.00466285	0.194153	0.0540197	0.00117577	0.0296659	0.0416452	0.0636987	0.0689471	0.0033692
Nicotra et al. (2018)		119	1025		58.2	0.67	17.8	6.98	0.15	2.15	4.2	3.55	5.84	0.43	99.97		55.1	0.3	28.06	0.61	0.17	0.16	10.24	4.25	1.1	99.99		0.968708	0.00838548	0.349157	0.0971468	0.00211446	0.0533499	0.074893	0.114553	0.123992	0.00605903	1.79836		0.538663	0.00466285	0.194153	0.0540197	0.00117577	0.0296659	0.0416452	0.0636987	0.0689471	0.0033692
Nicotra et al. (2018)		126	1025		58.2	0.67	17.8	6.98	0.15	2.15	4.2	3.55	5.84	0.43	99.97		55.06	0.27	28	0.76	0.2	0.21	10.4	4.06	1.05	100.01		0.968708	0.00838548	0.349157	0.0971468	0.00211446	0.0533499	0.074893	0.114553	0.123992	0.00605903	1.79836		0.538663	0.00466285	0.194153	0.0540197	0.00117577	0.0296659	0.0416452	0.0636987	0.0689471	0.0033692
Nicotra et al. (2018)		133	1025		58.2	0.67	17.8	6.98	0.15	2.15	4.2	3.55	5.84	0.43	99.97		54.81	0.25	27.77	0.77	0.27	0.34	10.18	4.51	1.1	100		0.968708	0.00838548	0.349157	0.0971468	0.00211446	0.0533499	0.074893	0.114553	0.123992	0.00605903	1.79836		0.538663	0.00466285	0.194153	0.0540197	0.00117577	0.0296659	0.0416452	0.0636987	0.0689471	0.0033692
Nicotra et al. (2018)		140	1025		58.2	0.67	17.8	6.98	0.15	2.15	4.2	3.55	5.84	0.43	99.97		55.22	0.25	27.81	0.61	0.16	0.33	10.29	4.26	1.07	100		0.968708	0.00838548	0.349157	0.0971468	0.00211446	0.0533499	0.074893	0.114553	0.123992	0.00605903	1.79836		0.538663	0.00466285	0.194153	0.0540197	0.00117577	0.0296659	0.0416452	0.0636987	0.0689471	0.0033692
Nicotra et al. (2018)		147	1025		58.2	0.67	17.8	6.98	0.15	2.15	4.2	3.55	5.84	0.43	99.97		55	0.18	28.03	0.76	0.13	0.23	10.33	4.24	1.12	100.02		0.968708	0.00838548	0.349157	0.0971468	0.00211446	0.0533499	0.074893	0.114553	0.123992	0.00605903	1.79836		0.538663	0.00466285	0.194153	0.0540197	0.00117577	0.0296659	0.0416452	0.0636987	0.0689471	0.0033692
Nicotra et al. (2018)		154	1025		58.2	0.67	17.8	6.98	0.15	2.15	4.2	3.55	5.84	0.43	99.97		54.77	0.22	28.01	0.75	0.09	0.35	10.44	4.33	1.02	99.98		0.968708	0.00838548	0.349157	0.0971468	0.00211446	0.0533499	0.074893	0.114553	0.123992	0.00605903	1.79836		0.538663	0.00466285	0.194153	0.0540197	0.00117577	0.0296659	0.0416452	0.0636987	0.0689471	0.0033692
Nicotra et al. (2018)		161	1025		58.2	0.67	17.8	6.98	0.15	2.15	4.2	3.55	5.84	0.43	99.97		54.59	0.23	28.23	0.71	0.19	0.19	10.65	4.24	0.98	100.01		0.968708	0.00838548	0.349157	0.0971468	0.00211446	0.0533499	0.074893	0.114553	0.123992	0.00605903	1.79836		0.538663	0.00466285	0.194153	0.0540197	0.00117577	0.0296659	0.0416452	0.0636987	0.0689471	0.0033692
Nicotra et al. (2018)		168	1025		58.2	0.67	17.8	6.98	0.15	2.15	4.2	3.55	5.84	0.43	99.97		53.68	0.23	28.94	0.66	0.08	0.3	11.42	3.74	0.95	100		0.968708	0.00838548	0.349157	0.0971468	0.00211446	0.0533499	0.074893	0.114553	0.123992	0.00605903	1.79836		0.538663	0.00466285	0.194153	0.0540197	0.00117577	0.0296659	0.0416452	0.0636987	0.0689471	0.0033692
Nicotra et al. (2018)		175	1025		58.2	0.67	17.8	6.98	0.15	2.15	4.2	3.55	5.84	0.43	99.97		53.21	0.27	29.05	0.72	0.17	0.35	11.52	3.77	0.94	100		0.968708	0.00838548	0.349157	0.0971468	0.00211446	0.0533499	0.074893	0.114553	0.123992	0.00605903	1.79836		0.538663	0.00466285	0.194153	0.0540197	0.00117577	0.0296659	0.0416452	0.0636987	0.0689471	0.0033692
Nicotra et al. (2018)		182	1025		58.2	0.67	17.8	6.98	0.15	2.15	4.2	3.55	5.84	0.43	99.97		53.63	0.18	29.03	0.78	0.15	0.28	11.37	3.76	0.83	100.01		0.968708	0.00838548	0.349157	0.0971468	0.00211446	0.0533499	0.074893	0.114553	0.123992	0.00605903	1.79836		0.538663	0.00466285	0.194153	0.0540197	0.00117577	0.0296659	0.0416452	0.0636987	0.0689471	0.0033692
Nicotra et al. (2018)		189	1025		58.2	0.67	17.8	6.98	0.15	2.15	4.2	3.55	5.84	0.43	99.97		54.31	0.27	28.23	0.96	0.13	0.38	10.7	3.68	1.34	100		0.968708	0.00838548	0.349157	0.0971468	0.00211446	0.0533499	0.074893	0.114553	0.123992	0.00605903	1.79836		0.538663	0.00466285	0.194153	0.0540197	0.00117577	0.0296659	0.0416452	0.0636987	0.0689471	0.0033692
Nicotra et al. (2018)		196	1025		58.2	0.67	17.8	6.98	0.15	2.15	4.2	3.55	5.84	0.43	99.97		54.5	0.25	28.27	0.68	0.18	0.09	10.88	4.21	0.95	100.01		0.968708	0.00838548	0.349157	0.0971468	0.00211446	0.0533499	0.074893	0.114553	0.123992	0.00605903	1.79836		0.538663	0.00466285	0.194153	0.0540197	0.00117577	0.0296659	0.0416452	0.0636987	0.0689471	0.0033692
Nicotra et al. (2018)		203	1025		58.2	0.67	17.8	6.98	0.15	2.15	4.2	3.55	5.84	0.43	99.97		54.6	0.29	28.11	0.78	0.18	0.2	10.51	4.28	1.05	100		0.968708	0.00838548	0.349157	0.0971468	0.00211446	0.0533499	0.074893	0.114553	0.123992	0.00605903	1.79836		0.538663	0.00466285	0.194153	0.0540197	0.00117577	0.0296659	0.0416452	0.0636987	0.0689471	0.0033692
Nicotra et al. (2018)		210	1025		58.2	0.67	17.8	6.98	0.15	2.15	4.2	3.55	5.84	0.43	99.97		53.19	0.32	29.05	0.76	0.19	0.18	11.55	3.82	0.94	100		0.968708	0.00838548	0.349157	0.0971468	0.00211446	0.0533499	0.074893	0.114553	0.123992	0.00605903	1.79836		0.538663	0.00466285	0.194153	0.0540197	0.00117577	0.0296659	0.0416452	0.0636987	0.0689471	0.0033692
Nicotra et al. (2018)		217	1025		58.2	0.67	17.8	6.98	0.15	2.15	4.2	3.55	5.84	0.43	99.97		54.43	0.16	28.4	0.64	0	0.34	10.78	4.15	1.1	100		0.968708	0.00838548	0.349157	0.0971468	0.00211446	0.0533499	0.074893	0.114553	0.123992	0.00605903	1.79836		0.538663	0.00466285	0.194153	0.0540197	0.00117577	0.0296659	0.0416452	0.0636987	0.0689471	0.0033692
Nicotra et al. (2018)		224	1025		58.2	0.67	17.8	6.98	0.15	2.15	4.2	3.55	5.84	0.43	99.97		54.49	0.26	28.23	0.68	0.07	0.4	10.73	4.1	1.04	100		0.968708	0.00838548	0.349157	0.0971468	0.00211446	0.0533499	0.074893	0.114553	0.123992	0.00605903	1.79836		0.538663	0.00466285	0.194153	0.0540197	0.00117577	0.0296659	0.0416452	0.0636987	0.0689471	0.0033692
Nicotra et al. (2018)		231	1025		58.2	0.67	17.8	6.98	0.15	2.15	4.2	3.55	5.84	0.43	99.97		53.35	0.18	29.19	0.77	0.16	0.25	11.56	3.71	0.83	100		0.968708	0.00838548	0.349157	0.0971468	0.00211446	0.0533499	0.074893	0.114553	0.123992	0.00605903	1.79836		0.538663	0.00466285	0.194153	0.0540197	0.00117577	0.0296659	0.0416452	0.0636987	0.0689471	0.0033692
Nicotra et al. (2018)		238	1025		58.2	0.67	17.8	6.98	0.15	2.15	4.2	3.55	5.84	0.43	99.97		53.44	0.22	28.91	0.88	0.12	0.27	11.36	3.87	0.93	100		0.968708	0.00838548	0.349157	0.0971468	0.00211446	0.0533499	0.074893	0.114553	0.123992	0.00605903	1.79836		0.538663	0.00466285	0.194153	0.0540197	0.00117577	0.0296659	0.0416452	0.0636987	0.0689471	0.0033692
Nicotra et al. (2018)		245	1025		58.2	0.67	17.8	6.98	0.15	2.15	4.2	3.55	5.84	0.43	99.97		53.46	0.17	29.13	0.76	0.22	0.14	11.67	3.6	0.85	100		0.968708	0.00838548	0.349157	0.0971468	0.00211446	0.0533499	0.074893	0.114553	0.123992	0.00605903	1.79836		0.538663	0.00466285	0.194153	0.0540197	0.00117577	0.0296659	0.0416452	0.0636987	0.0689471	0.0033692
Nicotra et al. (2018)		252	1025		58.2	0.67	17.8	6.98	0.15	2.15	4.2	3.55	5.84	0.43	99.97		54.34	0.18	28.4	0.83	0.16	0.22	10.89	3.98	1	100		0.968708	0.00838548	0.349157	0.0971468	0.00211446	0.0533499	0.074893	0.114553	0.123992	0.00605903	1.79836		0.538663	0.00466285	0.194153	0.0540197	0.00117577	0.0296659	0.0416452	0.0636987	0.0689471	0.0033692
Nicotra et al. (2018)		259	1025		58.2	0.67	17.8	6.98	0.15	2.15	4.2	3.55	5.84	0.43	99.97		54.38	0.09	28.18	0.78	0.13	0.27	10.98	4.21	0.98	100		0.968708	0.00838548	0.349157	0.0971468	0.00211446	0.0533499	0.074893	0.114553	0.123992	0.00605903	1.79836		0.538663	0.00466285	0.194153	0.0540197	0.00117577	0.0296659	0.0416452	0.0636987	0.0689471	0.0033692
Nicotra et al. (2018)		266	1025		58.2	0.67	17.8	6.98	0.15	2.15	4.2	3.55	5.84	0.43	99.97		52.94	0.22	29.14	0.82	0.19	0.32	11.75	3.77	0.86	100.01		0.968708	0.00838548	0.349157	0.0971468	0.00211446	0.0533499	0.074893	0.114553	0.123992	0.00605903	1.79836		0.538663	0.00466285	0.194153	0.0540197	0.00117577	0.0296659	0.0416452	0.0636987	0.0689471	0.0033692
Nicotra et al. (2018)		273	1025		58.2	0.67	17.8	6.98	0.15	2.15	4.2	3.55	5.84	0.43	99.97		56.18	0.29	26.94	0.74	0.15	0.34	9.38	4.36	1.62	100		0.968708	0.00838548	0.349157	0.0971468	0.00211446	0.0533499	0.074893	0.114553	0.123992	0.00605903	1.79836		0.538663	0.00466285	0.194153	0.0540197	0.00117577	0.0296659	0.0416452	0.0636987	0.0689471	0.0033692
Nicotra et al. (2018)		280	1025		58.2	0.67	17.8	6.98	0.15	2.15	4.2	3.55	5.84	0.43	99.97		55.35	0.18	27.55	0.75	0.18	0.12	10.41	4.31	1.15	100		0.968708	0.00838548	0.349157	0.0971468	0.00211446	0.0533499	0.074893	0.114553	0.123992	0.00605903	1.79836		0.538663	0.00466285	0.194153	0.0540197	0.00117577	0.0296659	0.0416452	0.0636987	0.0689471	0.0033692
Nicotra et al. (2018)		287	1025		58.2	0.67	17.8	6.98	0.15	2.15	4.2	3.55	5.84	0.43	99.97		54.65	0.32	27.82	0.8	0.17	0.23	10.65	4.26	1.1	100		0.968708	0.00838548	0.349157	0.0971468	0.00211446	0.0533499	0.074893	0.114553	0.123992	0.00605903	1.79836		0.538663	0.00466285	0.194153	0.0540197	0.00117577	0.0296659	0.0416452	0.0636987	0.0689471	0.0033692
Nicotra et al. (2018)		294	1025		58.2	0.67	17.8	6.98	0.15	2.15	4.2	3.55	5.84	0.43	99.97		54.64	0.2	28.21	0.66	0.07	0.18	10.88	4.13	1.03	100		0.968708	0.00838548	0.349157	0.0971468	0.00211446	0.0533499	0.074893	0.114553	0.123992	0.00605903	1.79836		0.538663	0.00466285	0.194153	0.0540197	0.00117577	0.0296659	0.0416452	0.0636987	0.0689471	0.0033692
Nicotra et al. (2018)		301	1025		58.2	0.67	17.8	6.98	0.15	2.15	4.2	3.55	5.84	0.43	99.97		54.74	0.24	27.94	0.72	0.07	0.19	10.96	4.14	0.99	99.99		0.968708	0.00838548	0.349157	0.0971468	0.00211446	0.0533499	0.074893	0.114553	0.123992	0.00605903	1.79836		0.538663	0.00466285	0.194153	0.0540197	0.00117577	0.0296659	0.0416452	0.0636987	0.0689471	0.0033692
Nicotra et al. (2018)		308	1025		58.2	0.67	17.8	6.98	0.15	2.15	4.2	3.55	5.84	0.43	99.97		54.62	0.24	28.13	0.76	0.11	0.19	10.7	4.2	1.04	99.99		0.968708	0.00838548	0.349157	0.0971468	0.00211446	0.0533499	0.074893	0.114553	0.123992	0.00605903	1.79836		0.538663	0.00466285	0.194153	0.0540197	0.00117577	0.0296659	0.0416452	0.0636987	0.0689471	0.0033692
Nicotra et al. (2018)		315	1025		58.2	0.67	17.8	6.98	0.15	2.15	4.2	3.55	5.84	0.43	99.97		54.33	0.2	28.43	0.69	0.1	0.21	10.99	4.11	0.95	100.01		0.968708	0.00838548	0.349157	0.0971468	0.00211446	0.0533499	0.074893	0.114553	0.123992	0.00605903	1.79836		0.538663	0.00466285	0.194153	0.0540197	0.00117577	0.0296659	0.0416452	0.0636987	0.0689471	0.0033692
La Fossa 1888-90 - VL14 Plag1		profile	1008
Nicotra et al. (2018)		0	1008		62.3	0.48	14.8	5.5	0.14	1.86	5.89	3.62	5.21	0.25	100.05		57.04	0.13	26.52	0.74	0.14	0.2	8.72	4.78	1.75	100.02		1.03695	0.00600751	0.29031	0.0765484	0.0019735	0.0461538	0.105029	0.116812	0.110616	0.00352269	1.79392		0.578035	0.00334881	0.16183	0.0426709	0.0011001	0.0257279	0.0585469	0.0651153	0.0616614	0.00196368
Nicotra et al. (2018)		7	1008		62.3	0.48	14.8	5.5	0.14	1.86	5.89	3.62	5.21	0.25	100.05		56.97	0.22	26.7	0.67	0	0.2	8.73	4.84	1.69	100.02		1.03695	0.00600751	0.29031	0.0765484	0.0019735	0.0461538	0.105029	0.116812	0.110616	0.00352269	1.79392		0.578035	0.00334881	0.16183	0.0426709	0.0011001	0.0257279	0.0585469	0.0651153	0.0616614	0.00196368
Nicotra et al. (2018)		14	1008		62.3	0.48	14.8	5.5	0.14	1.86	5.89	3.62	5.21	0.25	100.05		57.12	0.22	26.52	0.69	0.12	0.32	8.75	4.59	1.67	100		1.03695	0.00600751	0.29031	0.0765484	0.0019735	0.0461538	0.105029	0.116812	0.110616	0.00352269	1.79392		0.578035	0.00334881	0.16183	0.0426709	0.0011001	0.0257279	0.0585469	0.0651153	0.0616614	0.00196368
Nicotra et al. (2018)		21	1008		62.3	0.48	14.8	5.5	0.14	1.86	5.89	3.62	5.21	0.25	100.05		56.67	0.15	26.59	0.85	0.14	0.04	9.02	4.94	1.61	100.01		1.03695	0.00600751	0.29031	0.0765484	0.0019735	0.0461538	0.105029	0.116812	0.110616	0.00352269	1.79392		0.578035	0.00334881	0.16183	0.0426709	0.0011001	0.0257279	0.0585469	0.0651153	0.0616614	0.00196368
Nicotra et al. (2018)		28	1008		62.3	0.48	14.8	5.5	0.14	1.86	5.89	3.62	5.21	0.25	100.05		56.61	0.19	26.73	0.73	0.09	0.28	8.83	4.85	1.68	99.99		1.03695	0.00600751	0.29031	0.0765484	0.0019735	0.0461538	0.105029	0.116812	0.110616	0.00352269	1.79392		0.578035	0.00334881	0.16183	0.0426709	0.0011001	0.0257279	0.0585469	0.0651153	0.0616614	0.00196368
Nicotra et al. (2018)		35	1008		62.3	0.48	14.8	5.5	0.14	1.86	5.89	3.62	5.21	0.25	100.05		57.37	0.22	26.24	0.7	0	0.27	8.2	4.89	2.12	100.01		1.03695	0.00600751	0.29031	0.0765484	0.0019735	0.0461538	0.105029	0.116812	0.110616	0.00352269	1.79392		0.578035	0.00334881	0.16183	0.0426709	0.0011001	0.0257279	0.0585469	0.0651153	0.0616614	0.00196368
Nicotra et al. (2018)		42	1008		62.3	0.48	14.8	5.5	0.14	1.86	5.89	3.62	5.21	0.25	100.05		57.43	0.18	26.15	0.61	0	0.2	8.83	4.78	1.83	100.01		1.03695	0.00600751	0.29031	0.0765484	0.0019735	0.0461538	0.105029	0.116812	0.110616	0.00352269	1.79392		0.578035	0.00334881	0.16183	0.0426709	0.0011001	0.0257279	0.0585469	0.0651153	0.0616614	0.00196368
Nicotra et al. (2018)		49	1008		62.3	0.48	14.8	5.5	0.14	1.86	5.89	3.62	5.21	0.25	100.05		57.25	0.33	26.21	0.85	0.15	0.24	8.4	4.76	1.81	100		1.03695	0.00600751	0.29031	0.0765484	0.0019735	0.0461538	0.105029	0.116812	0.110616	0.00352269	1.79392		0.578035	0.00334881	0.16183	0.0426709	0.0011001	0.0257279	0.0585469	0.0651153	0.0616614	0.00196368
Nicotra et al. (2018)		56	1008		62.3	0.48	14.8	5.5	0.14	1.86	5.89	3.62	5.21	0.25	100.05		56.96	0.19	26.34	0.89	0.13	0.27	8.57	4.83	1.82	100		1.03695	0.00600751	0.29031	0.0765484	0.0019735	0.0461538	0.105029	0.116812	0.110616	0.00352269	1.79392		0.578035	0.00334881	0.16183	0.0426709	0.0011001	0.0257279	0.0585469	0.0651153	0.0616614	0.00196368
Nicotra et al. (2018)		63	1008		62.3	0.48	14.8	5.5	0.14	1.86	5.89	3.62	5.21	0.25	100.05		56.95	0.27	26.23	0.76	0.14	0.27	8.43	5.05	1.91	100.01		1.03695	0.00600751	0.29031	0.0765484	0.0019735	0.0461538	0.105029	0.116812	0.110616	0.00352269	1.79392		0.578035	0.00334881	0.16183	0.0426709	0.0011001	0.0257279	0.0585469	0.0651153	0.0616614	0.00196368
Nicotra et al. (2018)		70	1008		62.3	0.48	14.8	5.5	0.14	1.86	5.89	3.62	5.21	0.25	100.05		56.76	0.36	26.45	0.83	0.19	0.29	8.52	4.83	1.79	100.02		1.03695	0.00600751	0.29031	0.0765484	0.0019735	0.0461538	0.105029	0.116812	0.110616	0.00352269	1.79392		0.578035	0.00334881	0.16183	0.0426709	0.0011001	0.0257279	0.0585469	0.0651153	0.0616614	0.00196368
Nicotra et al. (2018)		77	1008		62.3	0.48	14.8	5.5	0.14	1.86	5.89	3.62	5.21	0.25	100.05		56.7	0.25	26.67	0.81	0.07	0.19	8.85	4.73	1.72	99.99		1.03695	0.00600751	0.29031	0.0765484	0.0019735	0.0461538	0.105029	0.116812	0.110616	0.00352269	1.79392		0.578035	0.00334881	0.16183	0.0426709	0.0011001	0.0257279	0.0585469	0.0651153	0.0616614	0.00196368
Nicotra et al. (2018)		84	1008		62.3	0.48	14.8	5.5	0.14	1.86	5.89	3.62	5.21	0.25	100.05		56.8	0.16	26.53	0.75	0.1	0.19	8.95	4.81	1.71	100		1.03695	0.00600751	0.29031	0.0765484	0.0019735	0.0461538	0.105029	0.116812	0.110616	0.00352269	1.79392		0.578035	0.00334881	0.16183	0.0426709	0.0011001	0.0257279	0.0585469	0.0651153	0.0616614	0.00196368
Nicotra et al. (2018)		91	1008		62.3	0.48	14.8	5.5	0.14	1.86	5.89	3.62	5.21	0.25	100.05		56.44	0.24	26.92	0.9	0.15	0.3	8.85	4.58	1.63	100.01		1.03695	0.00600751	0.29031	0.0765484	0.0019735	0.0461538	0.105029	0.116812	0.110616	0.00352269	1.79392		0.578035	0.00334881	0.16183	0.0426709	0.0011001	0.0257279	0.0585469	0.0651153	0.0616614	0.00196368
Nicotra et al. (2018)		98	1008		62.3	0.48	14.8	5.5	0.14	1.86	5.89	3.62	5.21	0.25	100.05		56.96	0.23	26.67	0.71	0.13	0.26	8.88	4.56	1.6	100		1.03695	0.00600751	0.29031	0.0765484	0.0019735	0.0461538	0.105029	0.116812	0.110616	0.00352269	1.79392		0.578035	0.00334881	0.16183	0.0426709	0.0011001	0.0257279	0.0585469	0.0651153	0.0616614	0.00196368
Nicotra et al. (2018)		105	1008		62.3	0.48	14.8	5.5	0.14	1.86	5.89	3.62	5.21	0.25	100.05		56.43	0.22	26.98	0.75	0.11	0.22	9.14	4.57	1.58	100		1.03695	0.00600751	0.29031	0.0765484	0.0019735	0.0461538	0.105029	0.116812	0.110616	0.00352269	1.79392		0.578035	0.00334881	0.16183	0.0426709	0.0011001	0.0257279	0.0585469	0.0651153	0.0616614	0.00196368
Nicotra et al. (2018)		112	1008		62.3	0.48	14.8	5.5	0.14	1.86	5.89	3.62	5.21	0.25	100.05		57.32	0.26	26.39	0.72	0.13	0.2	8.56	4.7	1.72	100		1.03695	0.00600751	0.29031	0.0765484	0.0019735	0.0461538	0.105029	0.116812	0.110616	0.00352269	1.79392		0.578035	0.00334881	0.16183	0.0426709	0.0011001	0.0257279	0.0585469	0.0651153	0.0616614	0.00196368
Nicotra et al. (2018)		119	1008		62.3	0.48	14.8	5.5	0.14	1.86	5.89	3.62	5.21	0.25	100.05		57.69	0.39	25.99	0.65	0.14	0.1	8.12	4.97	1.95	100		1.03695	0.00600751	0.29031	0.0765484	0.0019735	0.0461538	0.105029	0.116812	0.110616	0.00352269	1.79392		0.578035	0.00334881	0.16183	0.0426709	0.0011001	0.0257279	0.0585469	0.0651153	0.0616614	0.00196368
Nicotra et al. (2018)		126	1008		62.3	0.48	14.8	5.5	0.14	1.86	5.89	3.62	5.21	0.25	100.05		57.86	0.17	26.12	0.66	0	0.3	8.29	4.81	1.78	99.99		1.03695	0.00600751	0.29031	0.0765484	0.0019735	0.0461538	0.105029	0.116812	0.110616	0.00352269	1.79392		0.578035	0.00334881	0.16183	0.0426709	0.0011001	0.0257279	0.0585469	0.0651153	0.0616614	0.00196368
Nicotra et al. (2018)		133	1008		62.3	0.48	14.8	5.5	0.14	1.86	5.89	3.62	5.21	0.25	100.05		56.96	0.2	26.48	0.69	0.18	0.24	8.5	4.95	1.81	100.01		1.03695	0.00600751	0.29031	0.0765484	0.0019735	0.0461538	0.105029	0.116812	0.110616	0.00352269	1.79392		0.578035	0.00334881	0.16183	0.0426709	0.0011001	0.0257279	0.0585469	0.0651153	0.0616614	0.00196368
Nicotra et al. (2018)		140	1008		62.3	0.48	14.8	5.5	0.14	1.86	5.89	3.62	5.21	0.25	100.05		56.71	0.27	26.71	0.81	0.2	0.21	8.54	4.78	1.77	100		1.03695	0.00600751	0.29031	0.0765484	0.0019735	0.0461538	0.105029	0.116812	0.110616	0.00352269	1.79392		0.578035	0.00334881	0.16183	0.0426709	0.0011001	0.0257279	0.0585469	0.0651153	0.0616614	0.00196368
Nicotra et al. (2018)		147	1008		62.3	0.48	14.8	5.5	0.14	1.86	5.89	3.62	5.21	0.25	100.05		57.28	0.13	26.14	0.64	0.1	0.34	8.58	4.98	1.81	100		1.03695	0.00600751	0.29031	0.0765484	0.0019735	0.0461538	0.105029	0.116812	0.110616	0.00352269	1.79392		0.578035	0.00334881	0.16183	0.0426709	0.0011001	0.0257279	0.0585469	0.0651153	0.0616614	0.00196368
Nicotra et al. (2018)		154	1008		62.3	0.48	14.8	5.5	0.14	1.86	5.89	3.62	5.21	0.25	100.05		57.62	0.15	26.32	0.67	0	0.21	8.4	4.81	1.82	100		1.03695	0.00600751	0.29031	0.0765484	0.0019735	0.0461538	0.105029	0.116812	0.110616	0.00352269	1.79392		0.578035	0.00334881	0.16183	0.0426709	0.0011001	0.0257279	0.0585469	0.0651153	0.0616614	0.00196368
Nicotra et al. (2018)		161	1008		62.3	0.48	14.8	5.5	0.14	1.86	5.89	3.62	5.21	0.25	100.05		57.16	0.28	26.48	0.76	0.16	0.15	8.49	4.66	1.88	100.02		1.03695	0.00600751	0.29031	0.0765484	0.0019735	0.0461538	0.105029	0.116812	0.110616	0.00352269	1.79392		0.578035	0.00334881	0.16183	0.0426709	0.0011001	0.0257279	0.0585469	0.0651153	0.0616614	0.00196368
Nicotra et al. (2018)		168	1008		62.3	0.48	14.8	5.5	0.14	1.86	5.89	3.62	5.21	0.25	100.05		57.11	0.27	26.35	0.78	0.11	0.13	8.69	4.72	1.84	100		1.03695	0.00600751	0.29031	0.0765484	0.0019735	0.0461538	0.105029	0.116812	0.110616	0.00352269	1.79392		0.578035	0.00334881	0.16183	0.0426709	0.0011001	0.0257279	0.0585469	0.0651153	0.0616614	0.00196368
Nicotra et al. (2018)		175	1008		62.3	0.48	14.8	5.5	0.14	1.86	5.89	3.62	5.21	0.25	100.05		57.53	0.19	26.03	0.67	0.07	0.28	8.42	4.8	2	99.99		1.03695	0.00600751	0.29031	0.0765484	0.0019735	0.0461538	0.105029	0.116812	0.110616	0.00352269	1.79392		0.578035	0.00334881	0.16183	0.0426709	0.0011001	0.0257279	0.0585469	0.0651153	0.0616614	0.00196368
Nicotra et al. (2018)		182	1008		62.3	0.48	14.8	5.5	0.14	1.86	5.89	3.62	5.21	0.25	100.05		56.4	0.35	26.61	0.77	0.13	0.22	9.13	4.74	1.65	100		1.03695	0.00600751	0.29031	0.0765484	0.0019735	0.0461538	0.105029	0.116812	0.110616	0.00352269	1.79392		0.578035	0.00334881	0.16183	0.0426709	0.0011001	0.0257279	0.0585469	0.0651153	0.0616614	0.00196368
Nicotra et al. (2018)		189	1008		62.3	0.48	14.8	5.5	0.14	1.86	5.89	3.62	5.21	0.25	100.05		56.73	0.21	26.5	0.88	0	0.36	8.94	4.67	1.7	99.99		1.03695	0.00600751	0.29031	0.0765484	0.0019735	0.0461538	0.105029	0.116812	0.110616	0.00352269	1.79392		0.578035	0.00334881	0.16183	0.0426709	0.0011001	0.0257279	0.0585469	0.0651153	0.0616614	0.00196368
Nicotra et al. (2018)		196	1008		62.3	0.48	14.8	5.5	0.14	1.86	5.89	3.62	5.21	0.25	100.05		56.57	0.29	26.65	0.83	0.2	0.13	9.13	4.6	1.59	99.99		1.03695	0.00600751	0.29031	0.0765484	0.0019735	0.0461538	0.105029	0.116812	0.110616	0.00352269	1.79392		0.578035	0.00334881	0.16183	0.0426709	0.0011001	0.0257279	0.0585469	0.0651153	0.0616614	0.00196368
Nicotra et al. (2018)		203	1008		62.3	0.48	14.8	5.5	0.14	1.86	5.89	3.62	5.21	0.25	100.05		56.63	0.29	26.89	0.68	0.09	0.15	8.99	4.68	1.6	100		1.03695	0.00600751	0.29031	0.0765484	0.0019735	0.0461538	0.105029	0.116812	0.110616	0.00352269	1.79392		0.578035	0.00334881	0.16183	0.0426709	0.0011001	0.0257279	0.0585469	0.0651153	0.0616614	0.00196368
Nicotra et al. (2018)		210	1008		62.3	0.48	14.8	5.5	0.14	1.86	5.89	3.62	5.21	0.25	100.05		56.62	0.28	26.8	0.67	0.08	0.15	9.07	4.72	1.61	100		1.03695	0.00600751	0.29031	0.0765484	0.0019735	0.0461538	0.105029	0.116812	0.110616	0.00352269	1.79392		0.578035	0.00334881	0.16183	0.0426709	0.0011001	0.0257279	0.0585469	0.0651153	0.0616614	0.00196368
Nicotra et al. (2018)		217	1008		62.3	0.48	14.8	5.5	0.14	1.86	5.89	3.62	5.21	0.25	100.05		56.97	0.22	26.52	0.77	0.14	0.23	8.66	4.74	1.75	100		1.03695	0.00600751	0.29031	0.0765484	0.0019735	0.0461538	0.105029	0.116812	0.110616	0.00352269	1.79392		0.578035	0.00334881	0.16183	0.0426709	0.0011001	0.0257279	0.0585469	0.0651153	0.0616614	0.00196368
Nicotra et al. (2018)		224	1008		62.3	0.48	14.8	5.5	0.14	1.86	5.89	3.62	5.21	0.25	100.05		56.96	0.28	26.32	0.69	0.12	0.29	8.64	4.82	1.88	100		1.03695	0.00600751	0.29031	0.0765484	0.0019735	0.0461538	0.105029	0.116812	0.110616	0.00352269	1.79392		0.578035	0.00334881	0.16183	0.0426709	0.0011001	0.0257279	0.0585469	0.0651153	0.0616614	0.00196368
Nicotra et al. (2018)		231	1008		62.3	0.48	14.8	5.5	0.14	1.86	5.89	3.62	5.21	0.25	100.05		57.21	0.24	26.38	0.67	0.08	0.21	8.54	4.85	1.83	100.01		1.03695	0.00600751	0.29031	0.0765484	0.0019735	0.0461538	0.105029	0.116812	0.110616	0.00352269	1.79392		0.578035	0.00334881	0.16183	0.0426709	0.0011001	0.0257279	0.0585469	0.0651153	0.0616614	0.00196368
Nicotra et al. (2018)		238	1008		62.3	0.48	14.8	5.5	0.14	1.86	5.89	3.62	5.21	0.25	100.05		56.06	0.31	27.1	0.69	0.1	0.15	9.23	4.79	1.58	100.01		1.03695	0.00600751	0.29031	0.0765484	0.0019735	0.0461538	0.105029	0.116812	0.110616	0.00352269	1.79392		0.578035	0.00334881	0.16183	0.0426709	0.0011001	0.0257279	0.0585469	0.0651153	0.0616614	0.00196368
Nicotra et al. (2018)		245	1008		62.3	0.48	14.8	5.5	0.14	1.86	5.89	3.62	5.21	0.25	100.05		56.46	0.26	26.75	0.78	0.06	0.23	9.16	4.75	1.54	99.99		1.03695	0.00600751	0.29031	0.0765484	0.0019735	0.0461538	0.105029	0.116812	0.110616	0.00352269	1.79392		0.578035	0.00334881	0.16183	0.0426709	0.0011001	0.0257279	0.0585469	0.0651153	0.0616614	0.00196368
Nicotra et al. (2018)		252	1008		62.3	0.48	14.8	5.5	0.14	1.86	5.89	3.62	5.21	0.25	100.05		56.56	0.3	26.54	0.75	0.13	0.24	9.11	4.68	1.68	99.99		1.03695	0.00600751	0.29031	0.0765484	0.0019735	0.0461538	0.105029	0.116812	0.110616	0.00352269	1.79392		0.578035	0.00334881	0.16183	0.0426709	0.0011001	0.0257279	0.0585469	0.0651153	0.0616614	0.00196368
Nicotra et al. (2018)		259	1008		62.3	0.48	14.8	5.5	0.14	1.86	5.89	3.62	5.21	0.25	100.05		57.13	0.35	26.17	0.77	0.14	0.21	8.52	4.82	1.9	100.01		1.03695	0.00600751	0.29031	0.0765484	0.0019735	0.0461538	0.105029	0.116812	0.110616	0.00352269	1.79392		0.578035	0.00334881	0.16183	0.0426709	0.0011001	0.0257279	0.0585469	0.0651153	0.0616614	0.00196368
Nicotra et al. (2018)		266	1008		62.3	0.48	14.8	5.5	0.14	1.86	5.89	3.62	5.21	0.25	100.05		56.63	0.19	26.71	0.72	0.12	0.31	8.82	4.75	1.74	99.99		1.03695	0.00600751	0.29031	0.0765484	0.0019735	0.0461538	0.105029	0.116812	0.110616	0.00352269	1.79392		0.578035	0.00334881	0.16183	0.0426709	0.0011001	0.0257279	0.0585469	0.0651153	0.0616614	0.00196368
Nicotra et al. (2018)		273	1008		62.3	0.48	14.8	5.5	0.14	1.86	5.89	3.62	5.21	0.25	100.05		56.22	0.22	26.92	0.82	0.2	0.15	9.24	4.69	1.54	100		1.03695	0.00600751	0.29031	0.0765484	0.0019735	0.0461538	0.105029	0.116812	0.110616	0.00352269	1.79392		0.578035	0.00334881	0.16183	0.0426709	0.0011001	0.0257279	0.0585469	0.0651153	0.0616614	0.00196368
Nicotra et al. (2018)		280	1008		62.3	0.48	14.8	5.5	0.14	1.86	5.89	3.62	5.21	0.25	100.05		56.47	0.23	26.59	0.9	0.19	0.34	8.9	4.81	1.58	100.01		1.03695	0.00600751	0.29031	0.0765484	0.0019735	0.0461538	0.105029	0.116812	0.110616	0.00352269	1.79392		0.578035	0.00334881	0.16183	0.0426709	0.0011001	0.0257279	0.0585469	0.0651153	0.0616614	0.00196368
Nicotra et al. (2018)		287	1008		62.3	0.48	14.8	5.5	0.14	1.86	5.89	3.62	5.21	0.25	100.05		56.06	0.15	27.47	0.61	0	0.26	9.45	4.53	1.48	100.01		1.03695	0.00600751	0.29031	0.0765484	0.0019735	0.0461538	0.105029	0.116812	0.110616	0.00352269	1.79392		0.578035	0.00334881	0.16183	0.0426709	0.0011001	0.0257279	0.0585469	0.0651153	0.0616614	0.00196368
Nicotra et al. (2018)		294	1008		62.3	0.48	14.8	5.5	0.14	1.86	5.89	3.62	5.21	0.25	100.05		56.86	0.36	26.58	0.69	0.09	0.24	8.63	4.92	1.61	99.98		1.03695	0.00600751	0.29031	0.0765484	0.0019735	0.0461538	0.105029	0.116812	0.110616	0.00352269	1.79392		0.578035	0.00334881	0.16183	0.0426709	0.0011001	0.0257279	0.0585469	0.0651153	0.0616614	0.00196368
Nicotra et al. (2018)		301	1008		62.3	0.48	14.8	5.5	0.14	1.86	5.89	3.62	5.21	0.25	100.05		56.5	0.25	27.09	0.68	0.16	0.2	8.94	4.63	1.56	100.01		1.03695	0.00600751	0.29031	0.0765484	0.0019735	0.0461538	0.105029	0.116812	0.110616	0.00352269	1.79392		0.578035	0.00334881	0.16183	0.0426709	0.0011001	0.0257279	0.0585469	0.0651153	0.0616614	0.00196368
Nicotra et al. (2018)		308	1008		62.3	0.48	14.8	5.5	0.14	1.86	5.89	3.62	5.21	0.25	100.05		57.77	0.12	26.32	0.72	0.09	0.15	8.3	4.71	1.82	100		1.03695	0.00600751	0.29031	0.0765484	0.0019735	0.0461538	0.105029	0.116812	0.110616	0.00352269	1.79392		0.578035	0.00334881	0.16183	0.0426709	0.0011001	0.0257279	0.0585469	0.0651153	0.0616614	0.00196368
Nicotra et al. (2018)		315	1008		62.3	0.48	14.8	5.5	0.14	1.86	5.89	3.62	5.21	0.25	100.05		56.42	0.24	26.71	0.82	0.18	0.26	9.01	4.81	1.54	99.99		1.03695	0.00600751	0.29031	0.0765484	0.0019735	0.0461538	0.105029	0.116812	0.110616	0.00352269	1.79392		0.578035	0.00334881	0.16183	0.0426709	0.0011001	0.0257279	0.0585469	0.0651153	0.0616614	0.00196368
Nicotra et al. (2018)		322	1008		62.3	0.48	14.8	5.5	0.14	1.86	5.89	3.62	5.21	0.25	100.05		57.12	0.26	26.44	0.73	0.19	0.23	8.69	4.68	1.66	100		1.03695	0.00600751	0.29031	0.0765484	0.0019735	0.0461538	0.105029	0.116812	0.110616	0.00352269	1.79392		0.578035	0.00334881	0.16183	0.0426709	0.0011001	0.0257279	0.0585469	0.0651153	0.0616614	0.00196368
Nicotra et al. (2018)		329	1008		62.3	0.48	14.8	5.5	0.14	1.86	5.89	3.62	5.21	0.25	100.05		55.99	0.41	26.66	0.96	0.24	0.25	9.08	4.42	1.99	100		1.03695	0.00600751	0.29031	0.0765484	0.0019735	0.0461538	0.105029	0.116812	0.110616	0.00352269	1.79392		0.578035	0.00334881	0.16183	0.0426709	0.0011001	0.0257279	0.0585469	0.0651153	0.0616614	0.00196368
Nicotra et al. (2018)		336	1008		62.3	0.48	14.8	5.5	0.14	1.86	5.89	3.62	5.21	0.25	100.05		57.42	0.19	26.35	0.7	0.16	0	8.6	4.81	1.79	100.02		1.03695	0.00600751	0.29031	0.0765484	0.0019735	0.0461538	0.105029	0.116812	0.110616	0.00352269	1.79392		0.578035	0.00334881	0.16183	0.0426709	0.0011001	0.0257279	0.0585469	0.0651153	0.0616614	0.00196368
Nicotra et al. (2018)		343	1008		62.3	0.48	14.8	5.5	0.14	1.86	5.89	3.62	5.21	0.25	100.05		57.13	0.21	26.31	0.69	0.23	0.26	8.58	4.77	1.82	100		1.03695	0.00600751	0.29031	0.0765484	0.0019735	0.0461538	0.105029	0.116812	0.110616	0.00352269	1.79392		0.578035	0.00334881	0.16183	0.0426709	0.0011001	0.0257279	0.0585469	0.0651153	0.0616614	0.00196368
Nicotra et al. (2018)		350	1008		62.3	0.48	14.8	5.5	0.14	1.86	5.89	3.62	5.21	0.25	100.05		56.87	0.32	26.37	0.72	0.14	0.24	8.76	4.83	1.76	100.01		1.03695	0.00600751	0.29031	0.0765484	0.0019735	0.0461538	0.105029	0.116812	0.110616	0.00352269	1.79392		0.578035	0.00334881	0.16183	0.0426709	0.0011001	0.0257279	0.0585469	0.0651153	0.0616614	0.00196368
Nicotra et al. (2018)		357	1008		62.3	0.48	14.8	5.5	0.14	1.86	5.89	3.62	5.21	0.25	100.05		56.91	0.15	26.58	0.68	0.06	0.23	9.04	4.73	1.63	100.01		1.03695	0.00600751	0.29031	0.0765484	0.0019735	0.0461538	0.105029	0.116812	0.110616	0.00352269	1.79392		0.578035	0.00334881	0.16183	0.0426709	0.0011001	0.0257279	0.0585469	0.0651153	0.0616614	0.00196368
Nicotra et al. (2018)		364	1008		62.3	0.48	14.8	5.5	0.14	1.86	5.89	3.62	5.21	0.25	100.05		57.96	0.24	25.68	0.76	0.14	0.28	7.77	5.02	2.15	100		1.03695	0.00600751	0.29031	0.0765484	0.0019735	0.0461538	0.105029	0.116812	0.110616	0.00352269	1.79392		0.578035	0.00334881	0.16183	0.0426709	0.0011001	0.0257279	0.0585469	0.0651153	0.0616614	0.00196368
Nicotra et al. (2018)		371	1008		62.3	0.48	14.8	5.5	0.14	1.86	5.89	3.62	5.21	0.25	100.05		57.64	0.32	26.01	0.83	0.11	0.09	8.33	4.82	1.85	100		1.03695	0.00600751	0.29031	0.0765484	0.0019735	0.0461538	0.105029	0.116812	0.110616	0.00352269	1.79392		0.578035	0.00334881	0.16183	0.0426709	0.0011001	0.0257279	0.0585469	0.0651153	0.0616614	0.00196368
Nicotra et al. (2018)		378	1008		62.3	0.48	14.8	5.5	0.14	1.86	5.89	3.62	5.21	0.25	100.05		56.57	0.19	26.82	0.77	0.13	0.28	8.98	4.71	1.55	100		1.03695	0.00600751	0.29031	0.0765484	0.0019735	0.0461538	0.105029	0.116812	0.110616	0.00352269	1.79392		0.578035	0.00334881	0.16183	0.0426709	0.0011001	0.0257279	0.0585469	0.0651153	0.0616614	0.00196368
Nicotra et al. (2018)		385	1008		62.3	0.48	14.8	5.5	0.14	1.86	5.89	3.62	5.21	0.25	100.05		56.78	0.35	26.53	0.73	0.14	0.23	8.85	4.69	1.7	100		1.03695	0.00600751	0.29031	0.0765484	0.0019735	0.0461538	0.105029	0.116812	0.110616	0.00352269	1.79392		0.578035	0.00334881	0.16183	0.0426709	0.0011001	0.0257279	0.0585469	0.0651153	0.0616614	0.00196368
Nicotra et al. (2018)		392	1008		62.3	0.48	14.8	5.5	0.14	1.86	5.89	3.62	5.21	0.25	100.05		56.43	0.26	26.88	0.8	0.2	0.26	8.84	4.67	1.66	100		1.03695	0.00600751	0.29031	0.0765484	0.0019735	0.0461538	0.105029	0.116812	0.110616	0.00352269	1.79392		0.578035	0.00334881	0.16183	0.0426709	0.0011001	0.0257279	0.0585469	0.0651153	0.0616614	0.00196368
Nicotra et al. (2018)		399	1008		62.3	0.48	14.8	5.5	0.14	1.86	5.89	3.62	5.21	0.25	100.05		56.32	0.23	26.93	0.75	0.2	0.15	9.13	4.64	1.65	100		1.03695	0.00600751	0.29031	0.0765484	0.0019735	0.0461538	0.105029	0.116812	0.110616	0.00352269	1.79392		0.578035	0.00334881	0.16183	0.0426709	0.0011001	0.0257279	0.0585469	0.0651153	0.0616614	0.00196368
Nicotra et al. (2018)		406	1008		62.3	0.48	14.8	5.5	0.14	1.86	5.89	3.62	5.21	0.25	100.05		57.09	0.22	26.5	0.75	0.05	0.25	8.61	4.83	1.7	100		1.03695	0.00600751	0.29031	0.0765484	0.0019735	0.0461538	0.105029	0.116812	0.110616	0.00352269	1.79392		0.578035	0.00334881	0.16183	0.0426709	0.0011001	0.0257279	0.0585469	0.0651153	0.0616614	0.00196368
Nicotra et al. (2018)		413	1008		62.3	0.48	14.8	5.5	0.14	1.86	5.89	3.62	5.21	0.25	100.05		56.86	0.14	26.64	0.75	0.2	0.29	8.56	4.78	1.79	100.01		1.03695	0.00600751	0.29031	0.0765484	0.0019735	0.0461538	0.105029	0.116812	0.110616	0.00352269	1.79392		0.578035	0.00334881	0.16183	0.0426709	0.0011001	0.0257279	0.0585469	0.0651153	0.0616614	0.00196368
Nicotra et al. (2018)		420	1008		62.3	0.48	14.8	5.5	0.14	1.86	5.89	3.62	5.21	0.25	100.05		57.94	0.26	25.98	0.7	0.09	0.19	7.68	5.04	2.12	100		1.03695	0.00600751	0.29031	0.0765484	0.0019735	0.0461538	0.105029	0.116812	0.110616	0.00352269	1.79392		0.578035	0.00334881	0.16183	0.0426709	0.0011001	0.0257279	0.0585469	0.0651153	0.0616614	0.00196368
Nicotra et al. (2018)		427	1008		62.3	0.48	14.8	5.5	0.14	1.86	5.89	3.62	5.21	0.25	100.05		57.48	0.31	26.17	0.75	0.09	0.28	8.34	4.76	1.82	100		1.03695	0.00600751	0.29031	0.0765484	0.0019735	0.0461538	0.105029	0.116812	0.110616	0.00352269	1.79392		0.578035	0.00334881	0.16183	0.0426709	0.0011001	0.0257279	0.0585469	0.0651153	0.0616614	0.00196368
Nicotra et al. (2018)		434	1008		62.3	0.48	14.8	5.5	0.14	1.86	5.89	3.62	5.21	0.25	100.05		57.55	0.18	26.41	0.64	0	0.23	8.52	4.76	1.72	100.01		1.03695	0.00600751	0.29031	0.0765484	0.0019735	0.0461538	0.105029	0.116812	0.110616	0.00352269	1.79392		0.578035	0.00334881	0.16183	0.0426709	0.0011001	0.0257279	0.0585469	0.0651153	0.0616614	0.00196368
Nicotra et al. (2018)		441	1008		62.3	0.48	14.8	5.5	0.14	1.86	5.89	3.62	5.21	0.25	100.05		57.08	0.14	26.66	0.72	0.1	0.22	8.49	4.83	1.76	100		1.03695	0.00600751	0.29031	0.0765484	0.0019735	0.0461538	0.105029	0.116812	0.110616	0.00352269	1.79392		0.578035	0.00334881	0.16183	0.0426709	0.0011001	0.0257279	0.0585469	0.0651153	0.0616614	0.00196368
Nicotra et al. (2018)		448	1008		62.3	0.48	14.8	5.5	0.14	1.86	5.89	3.62	5.21	0.25	100.05		56.76	0.26	26.68	0.8	0.18	0.16	8.87	4.71	1.57	99.99		1.03695	0.00600751	0.29031	0.0765484	0.0019735	0.0461538	0.105029	0.116812	0.110616	0.00352269	1.79392		0.578035	0.00334881	0.16183	0.0426709	0.0011001	0.0257279	0.0585469	0.0651153	0.0616614	0.00196368
Nicotra et al. (2018)		455	1008		62.3	0.48	14.8	5.5	0.14	1.86	5.89	3.62	5.21	0.25	100.05		57.68	0.23	25.99	0.72	0.11	0.12	8.23	4.92	2	100		1.03695	0.00600751	0.29031	0.0765484	0.0019735	0.0461538	0.105029	0.116812	0.110616	0.00352269	1.79392		0.578035	0.00334881	0.16183	0.0426709	0.0011001	0.0257279	0.0585469	0.0651153	0.0616614	0.00196368
Nicotra et al. (2018)		462	1008		62.3	0.48	14.8	5.5	0.14	1.86	5.89	3.62	5.21	0.25	100.05		56.59	0.32	26.67	0.75	0.16	0.29	8.74	4.74	1.73	99.99		1.03695	0.00600751	0.29031	0.0765484	0.0019735	0.0461538	0.105029	0.116812	0.110616	0.00352269	1.79392		0.578035	0.00334881	0.16183	0.0426709	0.0011001	0.0257279	0.0585469	0.0651153	0.0616614	0.00196368
Nicotra et al. (2018)		469	1008		62.3	0.48	14.8	5.5	0.14	1.86	5.89	3.62	5.21	0.25	100.05		57.94	0.34	25.45	0.79	0.12	0.25	7.66	5.11	2.35	100.01		1.03695	0.00600751	0.29031	0.0765484	0.0019735	0.0461538	0.105029	0.116812	0.110616	0.00352269	1.79392		0.578035	0.00334881	0.16183	0.0426709	0.0011001	0.0257279	0.0585469	0.0651153	0.0616614	0.00196368
Nicotra et al. (2018)		476	1008		62.3	0.48	14.8	5.5	0.14	1.86	5.89	3.62	5.21	0.25	100.05		57.46	0.28	26.08	0.83	0.16	0.16	8.35	4.8	1.88	100		1.03695	0.00600751	0.29031	0.0765484	0.0019735	0.0461538	0.105029	0.116812	0.110616	0.00352269	1.79392		0.578035	0.00334881	0.16183	0.0426709	0.0011001	0.0257279	0.0585469	0.0651153	0.0616614	0.00196368
Nicotra et al. (2018)		483	1008		62.3	0.48	14.8	5.5	0.14	1.86	5.89	3.62	5.21	0.25	100.05		57.8	0.35	25.79	0.84	0.15	0.32	7.89	4.96	1.9	100		1.03695	0.00600751	0.29031	0.0765484	0.0019735	0.0461538	0.105029	0.116812	0.110616	0.00352269	1.79392		0.578035	0.00334881	0.16183	0.0426709	0.0011001	0.0257279	0.0585469	0.0651153	0.0616614	0.00196368
La Fossa 1888-90 - VL14 Plag2		profile	1008
Nicotra et al. (2018)		0	1008		62.3	0.48	14.8	5.5	0.14	1.86	5.89	3.62	5.21	0.25	100.05		55.61	0.2	27.6	0.71	0.17	0.26	9.67	4.5	1.27	99.99		1.03695	0.00600751	0.29031	0.0765484	0.0019735	0.0461538	0.105029	0.116812	0.110616	0.00352269	1.79392		0.578035	0.00334881	0.16183	0.0426709	0.0011001	0.0257279	0.0585469	0.0651153	0.0616614	0.00196368
Nicotra et al. (2018)		6	1008		62.3	0.48	14.8	5.5	0.14	1.86	5.89	3.62	5.21	0.25	100.05		54.55	0.26	27.93	0.87	0.2	0.23	10.67	4.27	1.01	99.99		1.03695	0.00600751	0.29031	0.0765484	0.0019735	0.0461538	0.105029	0.116812	0.110616	0.00352269	1.79392		0.578035	0.00334881	0.16183	0.0426709	0.0011001	0.0257279	0.0585469	0.0651153	0.0616614	0.00196368
Nicotra et al. (2018)		12	1008		62.3	0.48	14.8	5.5	0.14	1.86	5.89	3.62	5.21	0.25	100.05		54.57	0.23	28.03	0.76	0.14	0.29	10.6	4.35	1.01	99.98		1.03695	0.00600751	0.29031	0.0765484	0.0019735	0.0461538	0.105029	0.116812	0.110616	0.00352269	1.79392		0.578035	0.00334881	0.16183	0.0426709	0.0011001	0.0257279	0.0585469	0.0651153	0.0616614	0.00196368
Nicotra et al. (2018)		18	1008		62.3	0.48	14.8	5.5	0.14	1.86	5.89	3.62	5.21	0.25	100.05		55.08	0.2	27.93	0.88	0.11	0.25	10.49	4.15	0.92	100.01		1.03695	0.00600751	0.29031	0.0765484	0.0019735	0.0461538	0.105029	0.116812	0.110616	0.00352269	1.79392		0.578035	0.00334881	0.16183	0.0426709	0.0011001	0.0257279	0.0585469	0.0651153	0.0616614	0.00196368
Nicotra et al. (2018)		24	1008		62.3	0.48	14.8	5.5	0.14	1.86	5.89	3.62	5.21	0.25	100.05		54.92	0.16	27.89	0.73	0.13	0.18	10.71	4.27	1.01	100		1.03695	0.00600751	0.29031	0.0765484	0.0019735	0.0461538	0.105029	0.116812	0.110616	0.00352269	1.79392		0.578035	0.00334881	0.16183	0.0426709	0.0011001	0.0257279	0.0585469	0.0651153	0.0616614	0.00196368
Nicotra et al. (2018)		30	1008		62.3	0.48	14.8	5.5	0.14	1.86	5.89	3.62	5.21	0.25	100.05		55.16	0.06	28.17	0.63	0	0.11	10.78	4.16	0.92	99.99		1.03695	0.00600751	0.29031	0.0765484	0.0019735	0.0461538	0.105029	0.116812	0.110616	0.00352269	1.79392		0.578035	0.00334881	0.16183	0.0426709	0.0011001	0.0257279	0.0585469	0.0651153	0.0616614	0.00196368
Nicotra et al. (2018)		36	1008		62.3	0.48	14.8	5.5	0.14	1.86	5.89	3.62	5.21	0.25	100.05		55.66	0.19	27.71	0.64	0.05	0.3	9.72	4.56	1.17	100		1.03695	0.00600751	0.29031	0.0765484	0.0019735	0.0461538	0.105029	0.116812	0.110616	0.00352269	1.79392		0.578035	0.00334881	0.16183	0.0426709	0.0011001	0.0257279	0.0585469	0.0651153	0.0616614	0.00196368
Nicotra et al. (2018)		42	1008		62.3	0.48	14.8	5.5	0.14	1.86	5.89	3.62	5.21	0.25	100.05		55.11	0.32	27.84	0.82	0.17	0.15	10.15	4.33	1.12	100.01		1.03695	0.00600751	0.29031	0.0765484	0.0019735	0.0461538	0.105029	0.116812	0.110616	0.00352269	1.79392		0.578035	0.00334881	0.16183	0.0426709	0.0011001	0.0257279	0.0585469	0.0651153	0.0616614	0.00196368
Nicotra et al. (2018)		48	1008		62.3	0.48	14.8	5.5	0.14	1.86	5.89	3.62	5.21	0.25	100.05		55.17	0.16	27.88	0.7	0.13	0.25	10.2	4.42	1.1	100.01		1.03695	0.00600751	0.29031	0.0765484	0.0019735	0.0461538	0.105029	0.116812	0.110616	0.00352269	1.79392		0.578035	0.00334881	0.16183	0.0426709	0.0011001	0.0257279	0.0585469	0.0651153	0.0616614	0.00196368
Nicotra et al. (2018)		54	1008		62.3	0.48	14.8	5.5	0.14	1.86	5.89	3.62	5.21	0.25	100.05		55.71	0.19	27.65	0.71	0.12	0.22	9.95	4.38	1.08	100.01		1.03695	0.00600751	0.29031	0.0765484	0.0019735	0.0461538	0.105029	0.116812	0.110616	0.00352269	1.79392		0.578035	0.00334881	0.16183	0.0426709	0.0011001	0.0257279	0.0585469	0.0651153	0.0616614	0.00196368
Nicotra et al. (2018)		60	1008		62.3	0.48	14.8	5.5	0.14	1.86	5.89	3.62	5.21	0.25	100.05		55.22	0.22	27.9	0.81	0.06	0.26	10.01	4.49	1.04	100.01		1.03695	0.00600751	0.29031	0.0765484	0.0019735	0.0461538	0.105029	0.116812	0.110616	0.00352269	1.79392		0.578035	0.00334881	0.16183	0.0426709	0.0011001	0.0257279	0.0585469	0.0651153	0.0616614	0.00196368
Nicotra et al. (2018)		66	1008		62.3	0.48	14.8	5.5	0.14	1.86	5.89	3.62	5.21	0.25	100.05		55.25	0.19	28.07	0.75	0.11	0.18	10.16	4.23	1.07	100.01		1.03695	0.00600751	0.29031	0.0765484	0.0019735	0.0461538	0.105029	0.116812	0.110616	0.00352269	1.79392		0.578035	0.00334881	0.16183	0.0426709	0.0011001	0.0257279	0.0585469	0.0651153	0.0616614	0.00196368
Nicotra et al. (2018)		72	1008		62.3	0.48	14.8	5.5	0.14	1.86	5.89	3.62	5.21	0.25	100.05		55.24	0.24	27.67	0.81	0.19	0.32	10.07	4.47	0.99	100		1.03695	0.00600751	0.29031	0.0765484	0.0019735	0.0461538	0.105029	0.116812	0.110616	0.00352269	1.79392		0.578035	0.00334881	0.16183	0.0426709	0.0011001	0.0257279	0.0585469	0.0651153	0.0616614	0.00196368
Nicotra et al. (2018)		78	1008		62.3	0.48	14.8	5.5	0.14	1.86	5.89	3.62	5.21	0.25	100.05		55.32	0.15	27.79	0.84	0.13	0.22	10.22	4.33	0.99	99.99		1.03695	0.00600751	0.29031	0.0765484	0.0019735	0.0461538	0.105029	0.116812	0.110616	0.00352269	1.79392		0.578035	0.00334881	0.16183	0.0426709	0.0011001	0.0257279	0.0585469	0.0651153	0.0616614	0.00196368
Nicotra et al. (2018)		84	1008		62.3	0.48	14.8	5.5	0.14	1.86	5.89	3.62	5.21	0.25	100.05		55.22	0.2	27.81	0.85	0.14	0.26	10.01	4.47	1.03	99.99		1.03695	0.00600751	0.29031	0.0765484	0.0019735	0.0461538	0.105029	0.116812	0.110616	0.00352269	1.79392		0.578035	0.00334881	0.16183	0.0426709	0.0011001	0.0257279	0.0585469	0.0651153	0.0616614	0.00196368
Nicotra et al. (2018)		90	1008		62.3	0.48	14.8	5.5	0.14	1.86	5.89	3.62	5.21	0.25	100.05		55.04	0.23	28.02	0.73	0.15	0.16	10.22	4.41	1.03	99.99		1.03695	0.00600751	0.29031	0.0765484	0.0019735	0.0461538	0.105029	0.116812	0.110616	0.00352269	1.79392		0.578035	0.00334881	0.16183	0.0426709	0.0011001	0.0257279	0.0585469	0.0651153	0.0616614	0.00196368
Nicotra et al. (2018)		96	1008		62.3	0.48	14.8	5.5	0.14	1.86	5.89	3.62	5.21	0.25	100.05		55.21	0.21	28.04	0.69	0.16	0.21	10.01	4.42	1.05	100		1.03695	0.00600751	0.29031	0.0765484	0.0019735	0.0461538	0.105029	0.116812	0.110616	0.00352269	1.79392		0.578035	0.00334881	0.16183	0.0426709	0.0011001	0.0257279	0.0585469	0.0651153	0.0616614	0.00196368
Nicotra et al. (2018)		102	1008		62.3	0.48	14.8	5.5	0.14	1.86	5.89	3.62	5.21	0.25	100.05		54.98	0.24	27.63	0.78	0.12	0.23	10.58	4.39	1.07	100.02		1.03695	0.00600751	0.29031	0.0765484	0.0019735	0.0461538	0.105029	0.116812	0.110616	0.00352269	1.79392		0.578035	0.00334881	0.16183	0.0426709	0.0011001	0.0257279	0.0585469	0.0651153	0.0616614	0.00196368
Nicotra et al. (2018)		108	1008		62.3	0.48	14.8	5.5	0.14	1.86	5.89	3.62	5.21	0.25	100.05		55.43	0.15	28.03	0.61	0	0.2	10.34	4.29	0.96	100.01		1.03695	0.00600751	0.29031	0.0765484	0.0019735	0.0461538	0.105029	0.116812	0.110616	0.00352269	1.79392		0.578035	0.00334881	0.16183	0.0426709	0.0011001	0.0257279	0.0585469	0.0651153	0.0616614	0.00196368
Nicotra et al. (2018)		114	1008		62.3	0.48	14.8	5.5	0.14	1.86	5.89	3.62	5.21	0.25	100.05		54.92	0.23	27.95	0.86	0.15	0.22	10.13	4.53	1.03	100.02		1.03695	0.00600751	0.29031	0.0765484	0.0019735	0.0461538	0.105029	0.116812	0.110616	0.00352269	1.79392		0.578035	0.00334881	0.16183	0.0426709	0.0011001	0.0257279	0.0585469	0.0651153	0.0616614	0.00196368
Nicotra et al. (2018)		120	1008		62.3	0.48	14.8	5.5	0.14	1.86	5.89	3.62	5.21	0.25	100.05		56.32	0.17	27.15	0.77	0.21	0.18	9.48	4.49	1.23	100		1.03695	0.00600751	0.29031	0.0765484	0.0019735	0.0461538	0.105029	0.116812	0.110616	0.00352269	1.79392		0.578035	0.00334881	0.16183	0.0426709	0.0011001	0.0257279	0.0585469	0.0651153	0.0616614	0.00196368
Nicotra et al. (2018)		126	1008		62.3	0.48	14.8	5.5	0.14	1.86	5.89	3.62	5.21	0.25	100.05		56.69	0.15	26.89	0.67	0.07	0.32	9.08	4.85	1.28	100		1.03695	0.00600751	0.29031	0.0765484	0.0019735	0.0461538	0.105029	0.116812	0.110616	0.00352269	1.79392		0.578035	0.00334881	0.16183	0.0426709	0.0011001	0.0257279	0.0585469	0.0651153	0.0616614	0.00196368
Nicotra et al. (2018)		132	1008		62.3	0.48	14.8	5.5	0.14	1.86	5.89	3.62	5.21	0.25	100.05		55.35	0.16	27.79	0.78	0.2	0.22	9.94	4.5	1.06	100		1.03695	0.00600751	0.29031	0.0765484	0.0019735	0.0461538	0.105029	0.116812	0.110616	0.00352269	1.79392		0.578035	0.00334881	0.16183	0.0426709	0.0011001	0.0257279	0.0585469	0.0651153	0.0616614	0.00196368
Nicotra et al. (2018)		138	1008		62.3	0.48	14.8	5.5	0.14	1.86	5.89	3.62	5.21	0.25	100.05		55.26	0.11	28.05	0.7	0.05	0.27	10.07	4.47	1.02	100		1.03695	0.00600751	0.29031	0.0765484	0.0019735	0.0461538	0.105029	0.116812	0.110616	0.00352269	1.79392		0.578035	0.00334881	0.16183	0.0426709	0.0011001	0.0257279	0.0585469	0.0651153	0.0616614	0.00196368
Nicotra et al. (2018)		144	1008		62.3	0.48	14.8	5.5	0.14	1.86	5.89	3.62	5.21	0.25	100.05		56.53	0.22	27	0.72	0.13	0.24	9.28	4.75	1.14	100.01		1.03695	0.00600751	0.29031	0.0765484	0.0019735	0.0461538	0.105029	0.116812	0.110616	0.00352269	1.79392		0.578035	0.00334881	0.16183	0.0426709	0.0011001	0.0257279	0.0585469	0.0651153	0.0616614	0.00196368
Nicotra et al. (2018)		150	1008		62.3	0.48	14.8	5.5	0.14	1.86	5.89	3.62	5.21	0.25	100.05		55.25	0.17	27.8	0.72	0.06	0.24	10.2	4.53	1.04	100.01		1.03695	0.00600751	0.29031	0.0765484	0.0019735	0.0461538	0.105029	0.116812	0.110616	0.00352269	1.79392		0.578035	0.00334881	0.16183	0.0426709	0.0011001	0.0257279	0.0585469	0.0651153	0.0616614	0.00196368
Nicotra et al. (2018)		156	1008		62.3	0.48	14.8	5.5	0.14	1.86	5.89	3.62	5.21	0.25	100.05		55.67	0.14	27.66	0.74	0.15	0.22	9.92	4.46	1.03	99.99		1.03695	0.00600751	0.29031	0.0765484	0.0019735	0.0461538	0.105029	0.116812	0.110616	0.00352269	1.79392		0.578035	0.00334881	0.16183	0.0426709	0.0011001	0.0257279	0.0585469	0.0651153	0.0616614	0.00196368
Nicotra et al. (2018)		162	1008		62.3	0.48	14.8	5.5	0.14	1.86	5.89	3.62	5.21	0.25	100.05		55.28	0.31	27.69	0.78	0.19	0.29	9.89	4.5	1.07	100		1.03695	0.00600751	0.29031	0.0765484	0.0019735	0.0461538	0.105029	0.116812	0.110616	0.00352269	1.79392		0.578035	0.00334881	0.16183	0.0426709	0.0011001	0.0257279	0.0585469	0.0651153	0.0616614	0.00196368
Nicotra et al. (2018)		168	1008		62.3	0.48	14.8	5.5	0.14	1.86	5.89	3.62	5.21	0.25	100.05		55.15	0.21	27.79	0.7	0.14	0.34	10.17	4.49	1.02	100.01		1.03695	0.00600751	0.29031	0.0765484	0.0019735	0.0461538	0.105029	0.116812	0.110616	0.00352269	1.79392		0.578035	0.00334881	0.16183	0.0426709	0.0011001	0.0257279	0.0585469	0.0651153	0.0616614	0.00196368
Nicotra et al. (2018)		174	1008		62.3	0.48	14.8	5.5	0.14	1.86	5.89	3.62	5.21	0.25	100.05		55.24	0.12	28.21	0.66	0.04	0.21	10.46	4.13	0.94	100.01		1.03695	0.00600751	0.29031	0.0765484	0.0019735	0.0461538	0.105029	0.116812	0.110616	0.00352269	1.79392		0.578035	0.00334881	0.16183	0.0426709	0.0011001	0.0257279	0.0585469	0.0651153	0.0616614	0.00196368
Nicotra et al. (2018)		180	1008		62.3	0.48	14.8	5.5	0.14	1.86	5.89	3.62	5.21	0.25	100.05		55.44	0.1	27.77	0.84	0.1	0.21	9.81	4.72	1.02	100.01		1.03695	0.00600751	0.29031	0.0765484	0.0019735	0.0461538	0.105029	0.116812	0.110616	0.00352269	1.79392		0.578035	0.00334881	0.16183	0.0426709	0.0011001	0.0257279	0.0585469	0.0651153	0.0616614	0.00196368
Nicotra et al. (2018)		186	1008		62.3	0.48	14.8	5.5	0.14	1.86	5.89	3.62	5.21	0.25	100.05		56.5	0.13	26.96	0.71	0.07	0.23	9.45	4.81	1.13	99.99		1.03695	0.00600751	0.29031	0.0765484	0.0019735	0.0461538	0.105029	0.116812	0.110616	0.00352269	1.79392		0.578035	0.00334881	0.16183	0.0426709	0.0011001	0.0257279	0.0585469	0.0651153	0.0616614	0.00196368
Nicotra et al. (2018)		192	1008		62.3	0.48	14.8	5.5	0.14	1.86	5.89	3.62	5.21	0.25	100.05		56.43	0.09	27.2	0.6	0.12	0.24	9.36	4.72	1.23	99.99		1.03695	0.00600751	0.29031	0.0765484	0.0019735	0.0461538	0.105029	0.116812	0.110616	0.00352269	1.79392		0.578035	0.00334881	0.16183	0.0426709	0.0011001	0.0257279	0.0585469	0.0651153	0.0616614	0.00196368
Nicotra et al. (2018)		198	1008		62.3	0.48	14.8	5.5	0.14	1.86	5.89	3.62	5.21	0.25	100.05		56.18	0.23	27.09	0.76	0.2	0.24	9.18	4.81	1.32	100.01		1.03695	0.00600751	0.29031	0.0765484	0.0019735	0.0461538	0.105029	0.116812	0.110616	0.00352269	1.79392		0.578035	0.00334881	0.16183	0.0426709	0.0011001	0.0257279	0.0585469	0.0651153	0.0616614	0.00196368
Nicotra et al. (2018)		204	1008		62.3	0.48	14.8	5.5	0.14	1.86	5.89	3.62	5.21	0.25	100.05		56.6	0.24	26.79	0.78	0.14	0.18	9.14	4.74	1.37	99.98		1.03695	0.00600751	0.29031	0.0765484	0.0019735	0.0461538	0.105029	0.116812	0.110616	0.00352269	1.79392		0.578035	0.00334881	0.16183	0.0426709	0.0011001	0.0257279	0.0585469	0.0651153	0.0616614	0.00196368
Nicotra et al. (2018)		210	1008		62.3	0.48	14.8	5.5	0.14	1.86	5.89	3.62	5.21	0.25	100.05		56.38	0.2	26.9	0.7	0.04	0.27	9.3	4.89	1.31	99.99		1.03695	0.00600751	0.29031	0.0765484	0.0019735	0.0461538	0.105029	0.116812	0.110616	0.00352269	1.79392		0.578035	0.00334881	0.16183	0.0426709	0.0011001	0.0257279	0.0585469	0.0651153	0.0616614	0.00196368
Nicotra et al. (2018)		216	1008		62.3	0.48	14.8	5.5	0.14	1.86	5.89	3.62	5.21	0.25	100.05		56.37	0.23	27.11	0.66	0.11	0.34	9.15	4.76	1.27	100		1.03695	0.00600751	0.29031	0.0765484	0.0019735	0.0461538	0.105029	0.116812	0.110616	0.00352269	1.79392		0.578035	0.00334881	0.16183	0.0426709	0.0011001	0.0257279	0.0585469	0.0651153	0.0616614	0.00196368
Nicotra et al. (2018)		222	1008		62.3	0.48	14.8	5.5	0.14	1.86	5.89	3.62	5.21	0.25	100.05		56.32	0.15	26.84	0.84	0.15	0.33	9.18	4.9	1.29	100		1.03695	0.00600751	0.29031	0.0765484	0.0019735	0.0461538	0.105029	0.116812	0.110616	0.00352269	1.79392		0.578035	0.00334881	0.16183	0.0426709	0.0011001	0.0257279	0.0585469	0.0651153	0.0616614	0.00196368
Nicotra et al. (2018)		228	1008		62.3	0.48	14.8	5.5	0.14	1.86	5.89	3.62	5.21	0.25	100.05		56.2	0.09	27.32	0.66	0.11	0.31	9.27	4.79	1.25	100		1.03695	0.00600751	0.29031	0.0765484	0.0019735	0.0461538	0.105029	0.116812	0.110616	0.00352269	1.79392		0.578035	0.00334881	0.16183	0.0426709	0.0011001	0.0257279	0.0585469	0.0651153	0.0616614	0.00196368
Nicotra et al. (2018)		234	1008		62.3	0.48	14.8	5.5	0.14	1.86	5.89	3.62	5.21	0.25	100.05		56.47	0.35	26.85	0.79	0.12	0.08	9.32	4.66	1.35	99.99		1.03695	0.00600751	0.29031	0.0765484	0.0019735	0.0461538	0.105029	0.116812	0.110616	0.00352269	1.79392		0.578035	0.00334881	0.16183	0.0426709	0.0011001	0.0257279	0.0585469	0.0651153	0.0616614	0.00196368
Nicotra et al. (2018)		240	1008		62.3	0.48	14.8	5.5	0.14	1.86	5.89	3.62	5.21	0.25	100.05		56.59	0.18	27.09	0.7	0	0.27	9.06	4.89	1.21	99.99		1.03695	0.00600751	0.29031	0.0765484	0.0019735	0.0461538	0.105029	0.116812	0.110616	0.00352269	1.79392		0.578035	0.00334881	0.16183	0.0426709	0.0011001	0.0257279	0.0585469	0.0651153	0.0616614	0.00196368
Nicotra et al. (2018)		246	1008		62.3	0.48	14.8	5.5	0.14	1.86	5.89	3.62	5.21	0.25	100.05		56.69	0.33	26.61	0.79	0.17	0.2	8.97	4.95	1.29	100		1.03695	0.00600751	0.29031	0.0765484	0.0019735	0.0461538	0.105029	0.116812	0.110616	0.00352269	1.79392		0.578035	0.00334881	0.16183	0.0426709	0.0011001	0.0257279	0.0585469	0.0651153	0.0616614	0.00196368
[truncated: 31 more columns]
